# Supplementary material
Source: PubMed Central journal article supplement (PMC3050487)

# Supporting Information

**Toward the total synthesis of elisapterosin B:  
A Hg(OTf)<sub>2</sub>-promoted diastereoselective intramolecular  
Friedel-Crafts alkylation reaction**

Weijiang Ying, Charles L Barnes and Michael Harmata\*

Department of Chemistry  
University of Missouri-Columbia  
Columbia, Missouri 65211

### General information:

All reactions were carried out under an atmosphere of nitrogen in flame-dried glassware. THF was distilled over sodium-benzophenone before use. Acetonitrile and dichloromethane were distilled over calcium hydride. Chromatographic separations were carried out using Sorbent<sup>®</sup> standard silica gel (230-400 mesh). Analytical thin layer chromatography was performed on Sigma-Aldrich silica gel TLC plates with UV indicator.

Infrared spectra were recorded (film) on a Perkin Elmer 1600 series FT-IR spectrometer. Optical rotations were measured on a Jasco DIP-370 digital polarimeter. <sup>1</sup>H NMR were recorded on a Bruker ARX-250 (250 MHz), DRX-300 (300 MHz), DRX-500 (500 MHz) spectrometer and are reported in ppm (δ) from tetramethylsilane (TMS: δ 0.0 ppm). Data are reported as follows: chemical shift, multiplicity (s = singlet, d = doublet, t = triplet, q = quartet, m = multiplet, dd = doublet of doublet, ddd = doublet of doublet of doublet), coupling constants (Hz), and integration. <sup>13</sup>C NMR spectra were recorded on a Bruker ARX-250 (62.5 MHz), DRX-300 (75 MHz), and DRX-500 (125 MHz) spectrometer with complete proton decoupling. Chemical shifts are reported in ppm from tetramethylsilane with solvent resonance as the internal standard (CDCl<sub>3</sub>: δ 77.0 ppm).

### Experimental Procedure and Analytical Data

#### (*E*)-ethyl 3-(2-bromo-3,5-dimethoxy-4-methylphenyl)-acrylate (**10**):

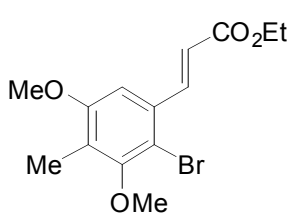

To triethyl phosphonoacetate (23.06 mL, 25.90 g, 115.55 mmol) in 200 mL of THF at 0 °C, *n*-BuLi (2.3 M in Hexanes, 46.37 mL, 106.66 mmol) was added dropwise. Then a solution of starting material aldehyde **7** (22.93 g, 88.88 mmol) in 100 mL of THF was added dropwise. The reaction was allowed to warm to room temperature and stirred for another 4 h before being quenched with 100 mL of water. The mixture was extracted with ethyl acetate (3x 100 mL). The combined organic layers were washed with brine and dried with Na<sub>2</sub>SO<sub>4</sub>. Filtration and concentration gave 31.6 g of crude product. The crude product was subjected to flash silica gel chromatography (20:80, EtOAc:hexanes) to obtain the pale yellow product in 100% yield. IR: 3089, 3072, 2995, 2974, 2946, 2901, 2844, 1712, 1626, 1581, 1552, 1471, 1438, 1385, 1328, 1270, 1246 cm<sup>-1</sup>; <sup>1</sup>H NMR (300 MHz, CDCl<sub>3</sub>): δ 8.08 (d, *J* = 15.9 Hz, 1H), 6.87 (s, 1H), 6.35 (d, *J* = 15.9 Hz, 1H), 4.29 (q, *J* = 7.2 Hz, 2H), 3.85 (s, 3H), 3.78 (s, 3H), 2.21 (s, 3H), 1.35 (t, *J* = 7.2 Hz, 3H); <sup>13</sup>C NMR (75 MHz, CDCl<sub>3</sub>): δ 166.4, 157.7, 156.1, 143.4, 132.7, 124.1, 120.2, 112.3, 104.6, 60.6, 60.3, 55.7, 14.3, 9.9; HRMS: *m/z* [M + Na]<sup>+</sup> calcd for C<sub>14</sub>H<sub>17</sub>BrNO<sub>4</sub>Na<sup>+</sup> 351.0202; Found 351.0201.

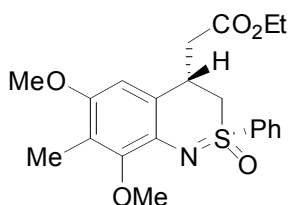

#### ethyl [(4*S*)-6,8-dimethoxy-7-methyl-2-oxido-2-phenyl-3,4-dihydro-2λ<sup>4</sup>,1-benzo-thiazin-4-yl]acetate (**6**):

A 300 mL flame dried round-bottomed flask was charged with **10** (29.15 g, 88.87 mmol), sulfoximine (*S*)-**11** (1.2 equiv, 16.55 g, 106.64 mmol), Cs<sub>2</sub>CO<sub>3</sub> (1.4 equiv, 40.54 g, 124.4 mmol),

BINAP (0.075 equiv, 4.150g, 6.66 mol) and Pd(OAc)<sub>2</sub> (0.05 equiv, 0.998 g, 4.44 mmol) and freshly distilled toluene (180 mL). After degassing with N<sub>2</sub> for 10 minutes, the reaction mixture was refluxed for 48 h. It was cooled, filtered through Celite and concentrated. The crude product was filtered through a short pad of silica gel with ethyl acetate. The eluent was dried with MgSO<sub>4</sub>, filtered through Celite, concentrated and transferred to a flame-dried round-bottomed flask. After removal of solvents from this crude product on a vacuum pump, 600 mL of freshly distilled THF was added. The solution was cooled down to -78 °C for 20 minutes. Then LiHMDS (2 equiv, 1.0 M in THF, 178 mL) was added dropwise over 30 minutes. The reaction was stirred for another 1 h at -78 °C before quenched with 200 mL of water. The reaction was extracted with ethyl acetate (3x 200 mL), and the organics washed with brine, dried with Na<sub>2</sub>SO<sub>4</sub>, and concentrated. Flash silica gel chromatography (50:50, EtOAc:hexanes) afforded 30.45 g of pale yellow semisolid **6** in 85% yield over two steps. IR: 3068, 2991, 2925, 2831, 1724, 1601, 1565, 1467, 1442, 1409, 1250, 1115 cm<sup>-1</sup>; <sup>1</sup>H NMR (250 MHz, CDCl<sub>3</sub>): δ 8.12 (td, *J* = 1.6, 6.9 Hz, 2H), 7.65 (tt, *J* = 1.4, 7.0 Hz, 1H), 7.54 (tt, *J* = 1.6, 7.0 Hz, 2H), 6.47 (s, 1H), 4.05 (q, *J* = 7.2 Hz, 2H), 3.89 (s, 3H), 3.80-3.70 (m, 4H), 3.60-3.35 (m, 2H), 2.90-2.65 (m, 2H), 2.18 (s, 3H), 1.16 (t, *J* = 7.2 Hz, 3H); <sup>13</sup>C NMR (62.5 MHz, CDCl<sub>3</sub>): δ 171.1, 152.4, 152.1, 139.6, 133.5, 131.6, 129.3, 128.8, 123.1, 120.2, 103.9, 60.7, 60.4, 55.9, 53.2, 37.0, 32.8, 14.1, 9.0; HRMS: *m/z* [M + Na]<sup>+</sup> calcd for C<sub>21</sub>H<sub>25</sub>NO<sub>5</sub>Na<sup>+</sup> 426.1346; Found 426.1338.

**2-[(4*S*)-6,8-dimethoxy-7-methyl-2-oxido-2-phenyl-3,4-dihydro-2λ<sup>4</sup>,1-benzothiazin-4-yl]ethanol:**

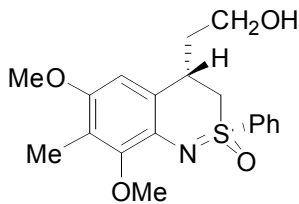

To a solution of **6** (11.58 g, 28.72 mmol) in THF at 0 °C in a flame dried flask under N<sub>2</sub>, LiAlH<sub>4</sub> (1.2 equiv, 1.309 g, 34.47 mmol) was added. The reaction was stirred at this temperature for another 30 minutes before being quenched with ethyl acetate (20 mL) and water (80-100 mL). The stirred mixture was warmed to room temperature. The reaction was extracted with ethyl acetate (3 x 100 mL), washed with brine, dried with

Na<sub>2</sub>SO<sub>4</sub>, and concentrated, and the crude product was purified by silica gel chromatography (75:25, EtOAc:hexanes) to give a pale yellow semisolid (9.874 g, 95%). IR: 3444, 3064, 2991, 2938, 2831, 1605, 1569, 1442, 1405, 1254, 1111 cm<sup>-1</sup>; <sup>1</sup>H NMR (300 MHz, CDCl<sub>3</sub>): δ 8.05 (td, *J* = 1.5, 7.2 Hz, 2H), 7.61 (tt, *J* = 1.5, 7.2 Hz, 1H), 7.52 (tt, *J* = 1.2, 6.9 Hz, 2H), 6.48 (s, 1H), 3.85 (s, 3H), 3.75 (s, 3H), 3.65-3.48 (m, 3H), 3.48-3.32 (m, 1H), 3.19 (dd, *J* = 8.7, 13.2 Hz, 1H), 2.72 (s, 1H), 2.30-2.10 (m, 4H), 1.80-1.60 (m, 1H); <sup>13</sup>C NMR (75 MHz, CDCl<sub>3</sub>): δ 152.2, 151.7, 139.5, 133.5, 131.3, 129.2, 128.6, 124.2, 119.6, 104.5, 60.3, 59.4, 55.9, 53.4, 34.4, 32.6, 8.9; HRMS: *m/z* [M + Na]<sup>+</sup> calcd for C<sub>19</sub>H<sub>23</sub>NO<sub>4</sub>Na<sup>+</sup> 384.1240; Found 384.1230.

**(*S*)-3-(2-amino-3,5-dimethoxy-4-methylphenyl)butan-1-ol (**12**):**

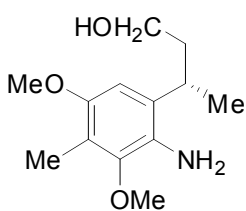

A flame dried round-bottomed flask was charged with Na (10 equiv, 230 mg, 10 mmol) and a magnetic stir bar, and equipped with condenser and N<sub>2</sub> balloon. With vigorous stirring, the flask was heated until the Na was complete melted. While vigorously stirring, Hg (4.37 g) was added onto Na the sand bath was removed. With

vigorous stirring, the 5% Na/Hg amalgam (10 equiv) was broken into small pieces and cooled down to room temperature. To this same flask, MeOH (16 mL) and then Na<sub>2</sub>HPO<sub>4</sub> (10 equiv, 1.42 g) were added. After 10 minutes, a solution of benzothiazine (1 mmol in 4 mL of THF) was added. The yellowish mixture was stirred for 5-8 h and turned to light grey. After filtration through Celite and removal of solvent, the crude product was diluted with water (3 mL) and saturated NH<sub>4</sub>Cl (3 mL). The mixture was extracted with EtOAc (3x 10 mL), dried with MgSO<sub>4</sub> and concentrated. The crude product was purified by silica gel chromatography (80:20, EtOAc:hexanes) to give **12** (216 mg, 90%); pale yellow oil; IR: 3361, 2935, 2833, 1582, 1486, 1461, 1418, 1363, 1287, 1230, 1192, 1130 cm<sup>-1</sup>; <sup>1</sup>H NMR (250 MHz, CDCl<sub>3</sub>): δ 6.44 (s, 1H), 3.76 (s, 3H), 3.71 (s, 3H), 3.66-3.44 (m, 4H), 3.35-3.23 (m, 1H), 3.22-3.04 (m, 1H), 2.14 (s, 3H), 2.00-1.80 (m, 1H), 1.65-1.45 (m, 1H), 1.30 (d, *J* = 7.0 Hz, 3H); <sup>13</sup>C NMR (62.5 MHz, CDCl<sub>3</sub>): δ 152.2, 147.6, 130.8, 130.6, 117.7, 104.4, 60.7, 59.9, 56.3, 41.6, 29.0, 21.0, 9.2; HRMS: *m/z* [M + Na]<sup>+</sup> calcd for C<sub>13</sub>H<sub>21</sub>O<sub>3</sub>Na<sup>+</sup> 262.1414, found 262.1411.

**(S)-5-(4-hydroxybutan-2-yl)-3-methoxy-2-methylcyclohexa-2,5-diene-1,4-dione (13):**

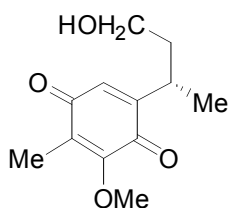

To a solution of ceric ammonium nitrate (CAN, 4 equiv, 2.193 g, 4 mmol) in water (33 mL) and MeCN (28 mL) at room temperature, a solution of aniline (1 mmol) in MeCN (5 mL) was added dropwise over 0.5 h, then water (33 mL) was added. The mixture was extracted with EtOAc (3x 40 mL). The combined organic layers were washed with water (2x 35 mL) and brine, dried with MgSO<sub>4</sub> and concentrated.

The crude product was purified by silica gel chromatography (75:25, EtOAc:hexanes) to give **13** as a pale yellow oil (170 mg, 76%); IR: 3407, 2942, 2876, 1667, 1646, 1605, 1446, 1373, 1340, 1315, 1270, 1201, 1136 cm<sup>-1</sup>; <sup>1</sup>H NMR (250 MHz, CDCl<sub>3</sub>): δ 6.42 (s, 1H), 3.95 (s, 3H), 3.65-3.45 (m, 2H), 3.20-2.95 (m, 1H), 2.15 (s, 1H), 1.89 (s, 3H), 1.68 (q, *J* = 6.5 Hz, 2H), 1.12 (d, *J* = 7.0 Hz, 3H); <sup>13</sup>C NMR (62.5 MHz, CDCl<sub>3</sub>): δ 188.8, 183.5, 156.3, 152.1, 131.2, 128.7, 60.9, 60.6, 39.4, 28.4, 19.6, 8.6; HRMS: *m/z* [M + Na]<sup>+</sup> calcd for C<sub>12</sub>H<sub>16</sub>O<sub>4</sub>Na 247.0941, found 247.0940.

**(S)-3-(2,3,5-trimethoxy-4-methylphenyl)butan-1-ol (14):**

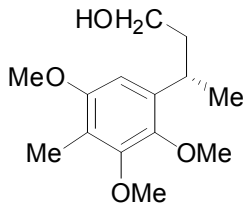

To a solution of quinone **13** (166 mg, 0.74 mmol) and Bu<sub>4</sub>NBr (0.5 equiv, 119 mg, 0.37 mol) in THF (10.9 mL) at room temperature under N<sub>2</sub>, a solution of Na<sub>2</sub>S<sub>2</sub>O<sub>4</sub> (6 equiv, 85%, 909 mg, 4.44 mmol) in water (5.4 mL) was added. After stirring for 15 minutes, a solution of KOH (30 equiv, 1.245 g, 22.2 mmol) in water (3.5 mL) was added. After 15 minutes, Me<sub>2</sub>SO<sub>4</sub> (10 equiv, 933 mg, 0.704 mL, 7.4 mmol) was added. The reaction was stirred for another 10 h. The mixture was extracted with EtOAc (3x 15 mL). The combined organic layers were washed with brine, dried with MgSO<sub>4</sub> and concentrated. The crude product was purified by silica gel chromatography (40:60, EtOAc:hexanes) to give **14** as a pale yellow oil (151 mg, 83%). IR: 3416, 2954, 2929, 2864, 1605, 1581, 1479, 1462, 1397, 1336, 1230, 1189, 1123 cm<sup>-1</sup>; <sup>1</sup>H NMR (250 MHz, CDCl<sub>3</sub>): δ 6.43 (s, 1H), 3.81 (s, 3H), 3.80 (s, 3H), 3.79 (s, 3H), 3.60-3.45 (m, 1H), 3.45-3.25 (m, 2H), 2.45 (dd, *J* = 4.5, 7.3 Hz, 1H), 2.11 (s, 3H),

2.00-1.80 (m, 1H), 1.63-1.42 (m, 1H), 1.29 (d,  $J = 7.0$  Hz, 3H);  $^{13}\text{C}$  NMR (62.5 MHz,  $\text{CDCl}_3$ ):  $\delta$  154.7, 151.6, 144.6, 136.4, 118.5, 103.1, 61.2, 60.8, 60.3, 55.7, 41.33, 28.0, 21.6, 8.7; HRMS:  $m/z$   $[\text{M} + \text{Na}]^+$  calcd for  $\text{C}_{14}\text{H}_{22}\text{O}_4\text{Na}$  277.1410, found 277.1411.

**(S)-3-(2,3,5-trimethoxy-4-methylphenyl)butanal:**

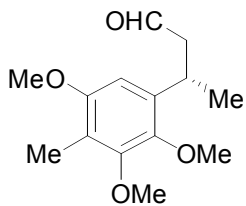

To a solution of  $(\text{ClCO})_2$  (1.3 equiv, 350 mL, 0.518 mg, 4.078 mmol) in  $\text{CH}_2\text{Cl}_2$  (20 mL) at  $-78^\circ\text{C}$ , DMSO (2.6 equiv, 0.579 mL, 8.156 mmol) was added dropwise. After stirring for 5 minutes, a solution of **14** (798 mg, 3.137 mmol) in  $\text{CH}_2\text{Cl}_2$  (10 mL) was added dropwise. The reaction was stirred for another 15 minutes before  $\text{Et}_3\text{N}$  (5 equiv, 2.3 mL, 15.685 mmol) was added dropwise. The reaction was warmed to room temperature and quenched with water (30 mL). The mixture was extracted with  $\text{CH}_2\text{Cl}_2$  (3x 25 mL). The combined organic layers were washed with brine, dried with  $\text{MgSO}_4$  and concentrated. The crude product was purified by silica gel chromatography (20:80,  $\text{EtOAc}$ :hexanes) to give a pale yellow oil (752 mg, 95%). IR: 2966, 2933, 2827, 1728, 1605, 1581, 1487, 1458, 1401, 1344, 1225, 1123  $\text{cm}^{-1}$ ;  $^1\text{H}$  NMR (250 MHz,  $\text{CDCl}_3$ ):  $\delta$  9.70 (s, 1H), 6.41 (s, 1H), 3.82 (s, 1H), 3.80 (s, 3H), 3.78 (s, 3H), 3.71 (dd,  $J = 7.3, 14.4$  Hz, 1H), 2.80-2.55 (m, 2H), 2.10 (s, 3H), 1.30 (d,  $J = 7.0$  Hz, 3H);  $^{13}\text{C}$  NMR (62.5 MHz,  $\text{CDCl}_3$ ):  $\delta$  201.9, 154.1, 151.9, 144.3, 135.5, 118.9, 103.4, 60.7, 59.9, 55.6, 51.1, 27.7, 21.4, 8.6; HRMS:  $m/z$   $[\text{M} + \text{Na}]^+$  calcd for  $\text{C}_{14}\text{H}_{20}\text{O}_4\text{Na}$  275.1254, found 275.1255.

**(S)-4-(2,3,5-trimethoxy-4-methylphenyl)pentanal (15):**

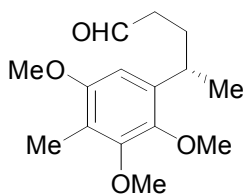

To a solution of diisopropylamine (1.42 equiv, 1.219 mL, 8.7 mmol) in THF (20 mL)  $n\text{-BuLi}$  (2.5 M in Hexanes, 3.408 mL, 8.52 mmol) was added dropwise at  $-20^\circ\text{C}$  and the solution was stirred for 15 minutes. This colorless LDA solution was added into a solution of methoxymethyl triphenylphosphonium chloride (1.5 equiv, 3.085 g, 9.0 mmol) in THF (30 mL) at  $0^\circ\text{C}$ . Upon addition of LDA, the reaction turned red and was stirred for another 10 minutes and cooled down to  $-78^\circ\text{C}$ . To this solution, a solution of (S)-3-(2,3,5-trimethoxy-4-methylphenyl)butanal (1.505 g, 5.965 mmol) in THF (10 mL) was added dropwise. The reaction was stirred at  $-78^\circ\text{C}$  for another 0.5 h and warmed to room temperature. The reaction was quenched by addition of water (20 mL) and extracted with  $\text{EtOAc}$  (3x 25 mL) and concentrated. The crude intermediate was used in the next step. The crude intermediate ((S)-1,3,4-trimethoxy-5-(5-methoxypent-4-en-2-yl)-2-methylbenzene) was dissolved in acetone (60 mL) and water (2 mL).  $p\text{-Toluenesulfonic acid}$  (3.0 equiv, 17.895 mmol) was added. After 15 minutes, water was added and the reaction was warmed to room temperature and quenched with water (180 mL). The mixture was extracted with  $\text{EtOAc}$  (3x 100 mL). The combined organic layers were washed with saturated  $\text{NaHCO}_3$  and brine, dried with  $\text{MgSO}_4$  and concentrated. The crude product was purified by silica gel chromatography (10:90,  $\text{EtOAc}$ :hexanes) to give **15** as a pale yellow oil (1.375 g, 89% over two steps). IR: 2958, 2933, 2868, 2831, 2721, 1724, 1605, 1581, 1487, 1458, 1401, 1225, 1123  $\text{cm}^{-1}$ ;  $^1\text{H}$  NMR (500 MHz,  $\text{CDCl}_3$ ):  $\delta$  9.70 (s, 1H), 6.40 (s, 1H), 3.81 (s, 3H), 3.79 (s, 3H), 3.77 (s, 3H), 3.30-3.10 (m, 1H), 2.48-2.35 (m, 1H), 2.35-

2.26 (m, 1H), 2.11 (s, 3H), 1.99-1.89 (m, 1H), 1.89-1.78 (m, 1H), 1.26 (d,  $J = 7.0$  Hz, 3H);  $^{13}\text{C}$  NMR (125 MHz,  $\text{CDCl}_3$ ):  $\delta$  202.4, 154.3, 151.8, 144.8, 136.4, 118.6, 103.1, 60.8, 60.1, 55.7, 42.2, 31.6, 29.8, 21.8, 8.7; HRMS:  $m/z$   $[\text{M} + \text{Na}]^+$  calcd for  $\text{C}_{15}\text{H}_{22}\text{O}_4\text{Na}$  289.1410, found 289.1408.

**(S)-1,3,4-trimethoxy-5-(5-methoxypent-4-en-2-yl)-2-methylbenzene:**

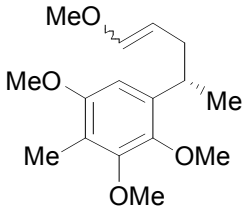 A mixture of two diastereomers,  $dr = 1.6:1$ ; IR: 2995, 2958, 2929, 2827, 1654, 1605, 1585, 1487, 1462, 1405, 1225, 1127  $\text{cm}^{-1}$ ;  $^1\text{H}$  NMR (500 MHz,  $\text{CDCl}_3$ ):  $\delta$  6.49 (s, 1H, minor), 6.43 (s, 1H, major), 6.29 (d,  $J = 12.5$  Hz, 1H, major), 5.88 (d,  $J = 6.5$  Hz, 1H, minor), 4.68 (td,  $J = 6.0, 12.5$  Hz, 1H, major), 4.31 (q,  $J = 6.5$  Hz, 1H, minor), 3.83 (s, 6H), 3.81 (s, 6H), 3.80 (s, 3H, minor), 3.79 (s, 3H, major), 3.57 (s, 3H, minor), 3.48 (s, 3H, major), 3.24-3.12 (m, 2H), 2.42-2.26 (m, 2H), 2.26-2.17 (m, 1H, major), 2.16-2.06 (m, 7H), 1.22 (d,  $J = 7.0$  Hz, 3H, minor), 1.21 (d,  $J = 7.0$  Hz, 3H, major);  $^{13}\text{C}$  NMR (125 MHz,  $\text{CDCl}_3$ ):  $\delta$  154.1, 154.1, 151.8, 151.7, 147.8, 146.6, 144.6, 137.9, 137.7, 118.1, 118.0, 105.4, 103.6, 103.6, 101.3, 61.0, 61.0, 60.2, 60.2, 59.4, 55.8, 55.8, 55.7, 36.0, 33.3, 32.5, 31.5, 30.3, 21.7, 20.9, 8.7; HRMS:  $m/z$   $[\text{M} + \text{Na}]^+$  calcd for  $\text{C}_{16}\text{H}_{24}\text{O}_4\text{Na}$  303.1567, found 303.1564.

**General Procedure Roush Modified Horner-Wadsworth-Emmons Reaction**

A flame-dried flask was charged with LiCl (1.2 equiv, 1.2 mmol) and MeCN (5 mL), followed by addition of triethyl 2-phosphonopropionate (1.2 equiv, 1.2 mmol) (or triethyl phosphonoacetate (1.2 equiv, 1.2 mmol)) and DBU (1.1 equiv, 1.1 mmol). Then a solution of **15** (1 equiv, 1 mmol) in MeCN (5 mL) was added. The reaction was stirred at room temperature for 0.5 h before being diluted with  $\text{Et}_2\text{O}$  (30 mL), washed with  $\text{H}_2\text{O}$  (2x 20 mL) and dried with  $\text{MgSO}_4$  and concentrated. The crude product was purified by silica gel chromatography (15:85, EtOAc:hexanes) to give pale yellow oil enoate.

**(S,E)-ethyl 2-methyl-6-(2,3,5-trimethoxy-4-methylphenyl)hept-2-enoate:**

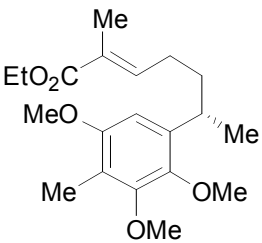 pale yellow oil, 93%; IR: 2958, 2933, 2868, 2831, 1708, 1650, 1605, 1585, 1487, 1458, 1405, 1266, 1225, 1131  $\text{cm}^{-1}$ ;  $^1\text{H}$  NMR (300 MHz,  $\text{CDCl}_3$ ):  $\delta$  6.76 (qt,  $J = 1.5, 7.2$  Hz, 1H), 6.42 (s, 1H), 4.17 (q,  $J = 7.2$  Hz, 2H), 3.81 (s, 3H), 3.79 (s, 3H), 3.78 (s, 3H), 3.28-3.10 (m, 1H), 2.22-2.00 (m, 5H), 1.82-1.62 (m, 5H), 1.28 (t,  $J = 7.2$  Hz, 3H), 1.23 (d,  $J = 6.9$  Hz, 3H);  $^{13}\text{C}$  NMR (75 MHz,  $\text{CDCl}_3$ ):  $\delta$  168.1, 154.2, 151.7, 144.7, 142.1, 137.2, 127.6, 118.2, 103.2, 60.8, 60.2, 60.0, 55.6, 36.3, 32.0, 27.0, 21.9, 14.2, 12.2, 8.6; HRMS:  $m/z$   $[\text{M} + \text{Na}]^+$  calcd for  $\text{C}_{20}\text{H}_{30}\text{O}_5\text{Na}$  373.1985, found 373.1975.

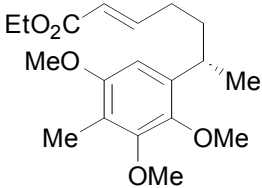 **(S,E)-ethyl 6-(2,3,5-trimethoxy-4-methylphenyl)hept-2-enoate:**  
pale yellow oil, 87%; IR: 2966, 2933, 2864, 2831, 1716, 1654, 1487, 1467, 1401, 1262, 1189, 1127  $\text{cm}^{-1}$ ;  $^1\text{H}$  NMR (500 MHz,  $\text{CDCl}_3$ ):  $\delta$  6.95 (td,  $J = 7.0, 15.5$  Hz, 1H), 6.40 (s, 1H), 5.79 (d,  $J$

= 15.5 Hz, 1H), 4.15 (q,  $J$  = 7.5 Hz, 2H), 3.81 (s, 3H), 3.79 (s, 3H), 3.77 (s, 3H), 3.22-3.10 (m, 1H), 2.24-2.05 (m, 5H), 1.80-1.65 (m, 2H), 1.27 (t,  $J$  = 7.5 Hz, 3H), 1.23 (d,  $J$  = 7.0 Hz, 3H);  $^{13}\text{C}$  NMR (125 MHz,  $\text{CDCl}_3$ ):  $\delta$  166.6, 154.2, 151.8, 149.0, 144.7, 136.9, 121.1, 118.3, 103.2, 60.8, 60.0, 59.9, 55.6, 35.9, 31.9, 30.4, 21.8, 14.2, 8.6; HRMS:  $m/z$   $[\text{M} + \text{Na}]^+$  calcd for  $\text{C}_{19}\text{H}_{28}\text{O}_5\text{Na}$  359.1829, found 359.1822.

### General Procedure for DIBAL Reduction, Synthesis of **5a** and **5b**

To a solution of enoate (1 mmol) in toluene (7 mL) at  $-78\text{ }^\circ\text{C}$  under  $\text{N}_2$ , DIBAL (3 equiv, 1.0 M in toluene, 3 mmol) was added dropwise. After stirring for 2 hours, the reaction was quenched with EtOAc (5 mL) and water (10 mL). The mixture was extracted with EtOAc (3x 10 mL). The combined organic layers were washed with brine, dried with  $\text{MgSO}_4$  and concentrated. The crude product was purified by silica gel chromatography (20:80, EtOAc:hexanes) to give **5a** or **5b**.

#### (*S,E*)-2-methyl-6-(2,3,5-trimethoxy-4-methylphenyl)hept-2-en-1-ol (**5a**):

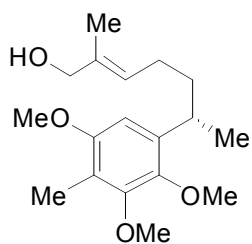

97%, colorless oil; IR: 3420, 2954, 2929, 2852, 1605, 1581, 1487, 1458, 1405, 1230, 1131  $\text{cm}^{-1}$ ;  $^1\text{H}$  NMR (500 MHz,  $\text{CDCl}_3$ ):  $\delta$  6.42 (s, 1H), 5.39 (t,  $J$  = 7.0 Hz, 1H), 3.96 (s, 2H), 3.81 (s, 3H), 3.79 (s, 3H), 3.78 (s, 3H), 3.22-3.13 (m, 1H), 2.11 (s, 3H), 2.07-1.88 (m, 2H), 1.70-1.58 (m, 3H), 1.56 (s, 3H), 1.22 (d,  $J$  = 7.5 Hz, 3H);  $^{13}\text{C}$  NMR (125 MHz,  $\text{CDCl}_3$ ):  $\delta$  154.2, 151.7, 144.6, 137.7, 134.7, 126.3, 118.0, 103.3, 68.9, 60.9, 60.1, 55.7, 37.2, 31.6, 25.8, 22.2, 13.5, 8.6; HRMS:  $m/z$   $[\text{M} + \text{Na}]^+$  calcd for  $\text{C}_{18}\text{H}_{28}\text{O}_4\text{Na}$  331.1880, found 331.1874.

#### (*S,E*)-6-(2,3,5-trimethoxy-4-methylphenyl)hept-2-en-1-ol (**5b**):

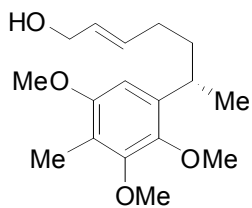

91%, colorless oil; IR: 3420, 2954, 2933, 2848, 1605, 1581, 1487, 1450, 1397, 1344, 1230, 1127, 1037  $\text{cm}^{-1}$ ;  $^1\text{H}$  NMR (500 MHz,  $\text{CDCl}_3$ ):  $\delta$  6.42 (s, 1H), 5.66 (td,  $J$  = 6.5, 15.0 Hz, 1H), 5.56 (td,  $J$  = 6.0, 15.5 Hz, 1H), 4.04 (d,  $J$  = 6.0 Hz, 2H), 3.81 (s, 3H), 3.79 (s, 3H), 3.77 (s, 3H), 3.25-3.12 (m, 1H), 2.11 (s, 3H), 2.06-1.90 (m, 2H), 1.80 (s, 1H), 1.72-1.59 (m, 2H), 1.21 (d,  $J$  = 7.5 Hz, 3H);  $^{13}\text{C}$  NMR (125 MHz,  $\text{CDCl}_3$ ):  $\delta$  154.2, 151.7, 144.6, 137.6, 133.1, 129.0, 118.1, 103.3, 63.7, 61.0, 60.2, 55.7, 36.9, 31.5, 30.4, 22.2, 8.7; HRMS:  $m/z$   $[\text{M} + \text{Na}]^+$  calcd for  $\text{C}_{17}\text{H}_{26}\text{O}_4\text{Na}$  317.1723, found 317.1720.

#### (1*R*,4*S*)-5,6,8-trimethoxy-4,7-dimethyl-1-(prop-1-en-2-yl)-1,2,3,4-tetrahydronaphthalene (**4**):

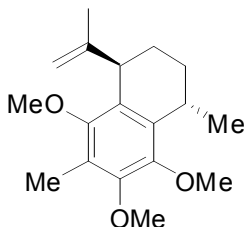

A flame-dried flask was charged with  $\text{Hg}(\text{OTf})_2$  (0.005 equiv, 0.1 M in MeCN, 0.0139 mL, 0.001394 mmol). After removal of MeCN on vacuum pump, the flask was vented twice with  $\text{N}_2$  and charged with 4.6 mL of toluene and followed by addition of a solution of **5a** (86 mg, 0.279 mmol) in toluene (1 mL). The mixture was heated at  $45\text{ }^\circ\text{C}$

for 4 h. The reaction was cooled down to room temperature and filtered through Celite and concentrated. The crude product (NMR shows *dr* = 9:1) was carefully purified by silica gel column (5:95, EtOAc:hexanes) to give **4** as a colorless oil (44 mg, 54%); two diastereomers, *dr* = 10:1; IR: 3068, 2933, 2860, 2823, 1646, 1589, 1454, 1405, 1332, 1279, 1246, 1103, 1066  $\text{cm}^{-1}$ ;  $^1\text{H}$  NMR (500 MHz,  $\text{CDCl}_3$ ):  $\delta$  4.81 (s, 1H, minor), 4.79 (s, 1H, major), 4.43 (s, 1H, minor), 3.94 (s, 1H, major), 3.85 (s, 3H, major), 3.84 (s, 3H, minor), 3.82 (s, 3H, minor), 3.81 (s, 3H, major), 3.67 (s, 3H, major), 3.63 (s, 3H, minor), 3.54-3.48 (m, 2H), 3.40-3.31 (m, 1H, minor), 3.17-3.00 (m, 1H, major), 2.18 (s, 3H, minor), 2.16 (s, 3H, major), 1.97-1.85 (m, 10H), 1.66-1.60 (m, 2H), 1.44-1.36 (m, 2H), 1.26 (d,  $J$  = 7.0 Hz, 3H, minor), 1.19 (d,  $J$  = 7.0 Hz, 3H, major);  $^{13}\text{C}$  NMR (125 MHz,  $\text{CDCl}_3$ ):  $\delta$  152.4, 152.3, 150.2, 150.0, 150.0, 149.8, 147.4, 146.9, 134.6, 134.3, 128.0, 127.8, 122.2, 121.9, 111.6, 110.8, 60.4, 60.3, 60.1, 60.0, 59.8, 59.8, 41.7, 39.8, 28.1, 27.2, 25.2, 24.5, 23.3, 23.0, 22.3, 22.1, 20.5, 20.4, 9.6, 9.4; HRMS:  $m/z$   $[\text{M} + \text{Na}]^+$  calcd for  $\text{C}_{18}\text{H}_{26}\text{O}_3\text{Na}^+$  313.1774, found 313.1772.

**(1*R*,4*S*)-5,6,8-trimethoxy-4,7-dimethyl-1-vinyl-1,2,3,4-tetrahydronaphthalene (16):**

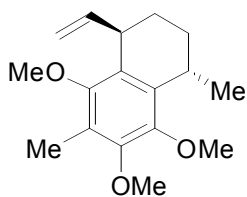

A flame-dried flask was charged with  $\text{Hg}(\text{OTf})_2$  (0.02 equiv, 0.1 M in MeCN, 0.0543 mL, 0.00543 mmol). After removal of MeCN on vacuum pump, the flask was vented twice with  $\text{N}_2$  and charged with 4.5 mL of toluene and followed by addition of a solution of **5b** (79.6 mg, 0.270 mmol) in toluene (0.9 mL). The mixture was heated at 70  $^\circ\text{C}$  for 15 minutes. The reaction was cooled down to room temperature and filtered through Celite and concentrated. The crude product (NMR shows *dr* = 6.3:1) was carefully purified by silica gel chromatography (5:95, EtOAc:hexanes) to give **16** (55 mg, 73%). Major isomer: IR: 3077, 2938, 2864, 2827, 1634, 1589, 1458, 1405, 1319, 1246, 1103, 1066  $\text{cm}^{-1}$ ;  $^1\text{H}$  NMR (300 MHz,  $\text{CDCl}_3$ ):  $\delta$  5.97 (ddd,  $J$  = 6.0, 10.2, 16.8 Hz, 1H), 5.00 (td,  $J$  = 1.6, 10.5 Hz, 1H), 4.62 (td,  $J$  = 1.5, 17.1 Hz, 1H), 3.85 (s, 3H), 3.81 (s, 3H), 3.80-3.74 (m, 1H), 3.68 (s, 3H), 3.20-3.00 (m, 1H), 2.18 (s, 3H), 2.10-1.80 (m, 2H), 1.70-1.60 (m, 1H), 1.50-1.40 (m, 1H), 1.19 (d,  $J$  = 7.2 Hz, 3H);  $^{13}\text{C}$  NMR (75 MHz,  $\text{CDCl}_3$ ):  $\delta$  152.7, 150.1, 147.3, 143.1, 134.2, 126.3, 122.4, 113.9, 60.6, 60.4, 59.8, 36.4, 27.3, 24.6, 22.4, 9.6; HRMS:  $m/z$   $[\text{M} + \text{Na}]^+$  calcd for  $\text{C}_{17}\text{H}_{24}\text{O}_3\text{Na}$  299.1618, found 299.1623.

**2-((1*R*,4*S*)-5,6,8-trimethoxy-4,7-dimethyl-1,2,3,4-tetrahydronaphthalen-1-yl)ethanol (17):**

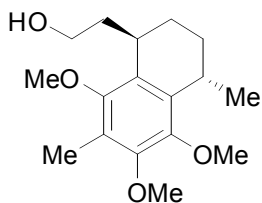

*dr* = 5:1

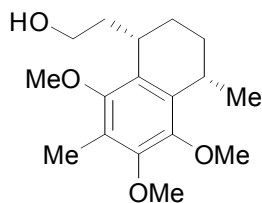

To a solution of **16** (98 mg, 0.355 mmol, *dr* = 5:1) in THF (3 mL) at 0  $^\circ\text{C}$ ,  $\text{BH}_3\cdot\text{THF}$  (2 equiv, 1.0 M in THF, 0.709 mL, 0.709 mmol) was added dropwise. The reaction was warmed to room temperature and stirred for another 1h and cooled down to 0  $^\circ\text{C}$  before an aqueous NaOH solution (5.2 equiv, 2M, 0.922 mL, 1.844 mmol) was added carefully, followed by addition of  $\text{H}_2\text{O}_2$  (5 equiv, 30% in water, 0.183 mL, 1.773

mmol). The reaction was stirred for another 2 h at room temperature and quenched with water (3 mL). The mixture was extracted with EtOAc (3x 6 mL). The combined organic layers were washed with brine, dried with MgSO<sub>4</sub> and concentrated. The crude product was purified by silica gel chromatography (30:70, EtOAc:hexanes) to give **17** as a colorless oil (74 mg, 71%, *dr* = 5:1). IR: 3314, 2929, 2864, 2819, 1589, 1454, 1405, 1303, 1254, 1119, 1099, 1066 cm<sup>-1</sup>; <sup>1</sup>H NMR (500 MHz, CDCl<sub>3</sub>): δ 3.85 (s, 3H, major), 3.82 (s, 3H, minor), 3.81 (s, 3H, minor), 3.79 (s, 3H, major), 3.70 (s, 3H, major), 3.69-3.53 (m, 7H), 3.20-3.07 (m, 2H), 3.07-2.97 (m, 2H), 2.39 (s, 2H, broad), 2.18 (s, 3H, minor), 2.17 (s, 3H, major), 2.00-1.86 (m, 4H), 1.85-1.55 (m, 6H), 1.55-1.47 (m, 2H), 1.26 (d, *J* = 7.0 Hz, 3H, minor), 1.18 (d, *J* = 7.0 Hz, 3H, major); <sup>13</sup>C NMR (125 MHz, CDCl<sub>3</sub>): δ 152.1, 151.9, 149.8, 149.6, 148.0, 147.4, 134.1, 133.7, 129.6, 129.3, 122.3, 121.8, 61.3, 61.0, 60.6, 60.5, 60.3, 59.9, 59.8, 39.6, 39.2, 28.8, 28.7, 27.6, 27.3, 27.2, 27.0, 24.7, 23.4, 22.6, 21.5, 9.5, 9.3; HRMS: *m/z* [M + Na]<sup>+</sup> calcd for C<sub>17</sub>H<sub>26</sub>O<sub>4</sub>Na 317.1723, found 317.1723.

**2-((1*R*,4*S*)-5,6,8-trimethoxy-4,7-dimethyl-1,2,3,4-tetrahydronaphthalen-1-yl)ethyl 4-methylbenzenesulfonate (**18**):**

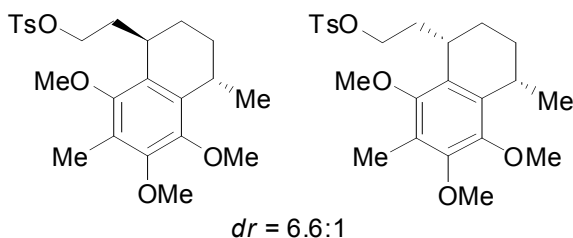

To a solution of **17** (77 mg, 0.261 mmol) in CH<sub>2</sub>Cl<sub>2</sub> (2.6 mL) at 0 °C, DMAP (0.1 equiv, 3.2 mg, 0.0262 mmol), Et<sub>3</sub>N (5 equiv, 0.184 mL, 1.31 mmol) and TsCl (1.3 equiv, 65 mg, 0.341 mmol) were added. The reaction was warmed to room temperature and stirred for 2 h before being quenched with water (3 mL). The

mixture was extracted with CH<sub>2</sub>Cl<sub>2</sub> (3x 5 mL). The combined organic layers were washed with brine, dried with MgSO<sub>4</sub> and concentrated. The crude product was purified by silica gel chromatography (20:80, EtOAc:hexanes) to give **18** as a white semisolid (94 mg, 84%, two diastereomers mixture, *dr* = 6.6: 1). IR: 2933, 2868, 2827, 1597, 1462, 1401, 1356, 1299, 1254, 1193, 1176, 1099, 1070 cm<sup>-1</sup>; <sup>1</sup>H NMR (500 MHz, CDCl<sub>3</sub>): δ 7.82 (d, *J* = 8.5 Hz, 2H, major), 7.81 (d, *J* = 8.5 Hz, 2H, minor), 7.35 (d, *J* = 8.5 Hz, 4H), 4.22-4.10 (m, 4H), 3.83 (s, 3H, major), 3.81 (s, 3H, minor), 3.79 (s, 3H, minor), 3.78 (s, 3H, major), 3.64 (s, 3H, major), 3.61 (s, 3H, minor), 3.14-3.04 (m, 2H), 3.03-2.87 (m, 2H), 2.45 (s, 6H), 2.18 (s, 3H, minor), 2.15 (s, 3H, major), 2.00-1.90 (m, 2H), 1.88-1.72 (m, 4H), 1.72-1.62 (m, 2H), 1.62-1.52 (m, 2H), 1.52-1.40 (m, 2H), 1.20 (d, *J* = 7.0 Hz, 3H, minor), 1.17 (d, *J* = 7.0 Hz, 3H, major); <sup>13</sup>C NMR (125 MHz, CDCl<sub>3</sub>): δ 152.4, 152.3, 149.9, 149.8, 147.4, 147.1, 144.5, 134.5, 133.6, 133.3, 129.7, 128.8, 128.7, 127.8, 122.7, 122.4, 70.0, 69.6, 60.3, 60.0, 60.0, 59.7, 35.3, 34.4, 29.4, 29.0, 27.7, 27.6, 27.1, 25.0, 24.5, 22.3, 22.1, 21.6, 20.3, 9.4, 9.3; HRMS: *m/z* [M + Na]<sup>+</sup> calcd for C<sub>24</sub>H<sub>32</sub>O<sub>6</sub>SN 471.1812, found 471.1809.

**(1*R*,4*S*)-5,6,8-trimethoxy-4,7-dimethyl-1-(2-(phenylsulfonyl)ethyl)-1,2,3,4-tetrahydronaphthalene (**19**):**

A mixture of tosylate **18** (145 mg, 0.323 mmol), thiophenol (2 equiv, 0.066 mL, 0.646 mmol), and anhydrous K<sub>2</sub>CO<sub>3</sub> (3 equiv, 134 mg, 0.97 mmol) in dry DMSO (3.2 mL)

under N<sub>2</sub> were stirred at 30 °C for 3 h. The reaction mixture was poured into water (15 mL). The mixture was extracted with Et<sub>2</sub>O (3x 15 mL). The combined organic layers were washed with brine, dried with MgSO<sub>4</sub> and concentrated. To a solution of crude sulfide in dry CH<sub>2</sub>Cl<sub>2</sub> (3 mL) at 0 °C under N<sub>2</sub>, was added *m*CPBA (3 equiv, 70-75%, 167 mg, 0.969 mmol). The reaction was stirred for another 17 h and quenched with water (4 mL). The mixture was extracted with CH<sub>2</sub>Cl<sub>2</sub> (3x 5 mL). The combined organic layers were washed with brine, dried with MgSO<sub>4</sub> and concentrated. The crude product was purified by silica gel chromatography (20:80, EtOAc:hexanes) to give **19** as a white solid (85 mg, 63%, two diastereomers mixture, *dr* = 6.6: 1). After recrystallization from CH<sub>2</sub>Cl<sub>2</sub>/MeOH, colorless needle crystals were obtained (the major isomer); m.p. 121-123 °C, IR: 2954, 2933, 2864, 2827, 1585, 1462, 1446, 1401, 1307, 1242, 1140, 1066 cm<sup>-1</sup>; <sup>1</sup>H NMR (500 MHz, CDCl<sub>3</sub>): δ 7.91 (d, *J* = 7.5 Hz, 2H), 7.64 (t, *J* = 7.5 Hz, 1H), 7.55 (d, *J* = 7.5 Hz, 2H), 3.83 (s, 3H), 3.78 (s, 3H), 3.59 (s, 3H), 3.30-3.15 (m, 2H), 3.13-3.03 (m, 1H), 2.93-2.80 (m, 1H), 2.13 (s, 3H), 2.04-1.93 (m, 1H), 1.90-1.68 (m, 3H), 1.56-1.50 (m, 1H), 1.49-1.41 (m, 1H), 1.15 (d, *J* = 7.0 Hz, 3H); <sup>13</sup>C NMR (125 MHz, CDCl<sub>3</sub>): δ 152.4, 150.1, 147.2, 139.3, 133.6, 133.5, 129.2, 128.1, 127.9, 122.7, 60.4, 60.4, 59.8, 55.4, 31.6, 28.2, 27.1, 24.4, 22.3, 20.7, 9.5; HRMS: *m/z* [M + Na]<sup>+</sup> calcd for C<sub>23</sub>H<sub>30</sub>O<sub>5</sub>SNa 441.1706, found 441.1703.

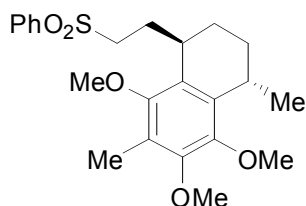

1H NMR

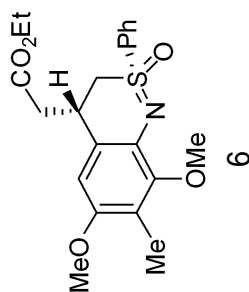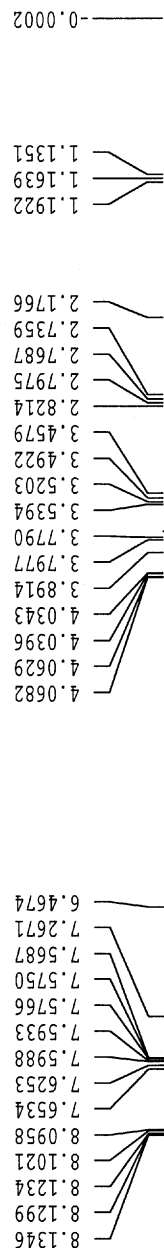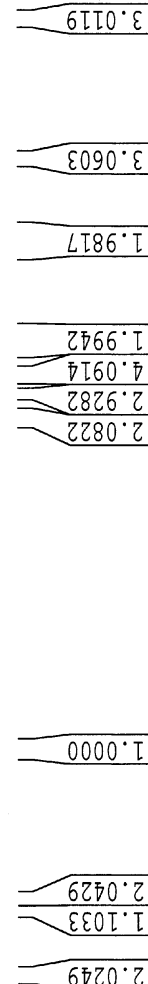

Current Data Parameters  
NAME wy-IV-134-A  
EXPNO 1  
PROCNO 1

F2 - Acquisition Parameters  
Date\_ 20090421  
Time 15.55  
INSTRUM arx250  
PROBHD 5 mm QNP 1H  
PULPROG zg30  
TD 32768  
SOLVENT CDCl3  
NS 16  
DS 2  
SWH 5208.333 Hz  
FIDRES 0.158946 Hz  
AQ 3.1457779 sec  
RG 715  
DW 96.000 usec  
DE 137.14 usec  
TE 300.0 K  
D1 1.0000000 sec  
P1 8.50 usec  
SF01 250.1315321 MHz  
NUCLEUS 1H

F2 - Processing parameters  
SI 16384  
SF 250.1300059 MHz  
WDW EM  
SSB 0  
LB 0.20 Hz  
GB 0  
PC 1.50

1D NMR plot parameters  
CX 20.00 cm  
CY 10.00 cm  
F1P 10.000 ppm  
F1 2501.30 Hz  
F2P -1.000 ppm  
F2 -250.13 Hz  
PPMCM 0.55000 ppm/cm  
HZCM 137.57150 Hz/cm

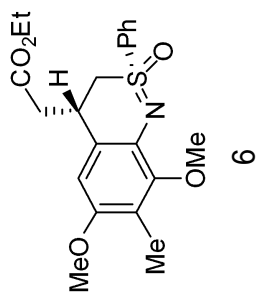

Current Data Parameters  
 NAME wy-IV-134-A  
 EXPNO 2  
 PROCNO 1

F2 - Acquisition Parameters  
 Date\_ 20090421  
 Time 15.59  
 INSTRUM arx250  
 PROBHD 5 mm QNP 1H  
 PULPROG zgdc30  
 TD 36864  
 SOLVENT CDCl3  
 NS 68  
 DS 4  
 SWH 17241.379 Hz  
 FIDRES 0.467702 Hz  
 AQ 1.0691060 sec  
 RG 22800  
 DW 29.000 usec  
 DE 41.43 usec  
 TE 300.0 K  
 D12 0.0002000 sec  
 DL5 23.00 dB  
 CPDPRG waltz16  
 P31 103.00 usec  
 D1 2.0000000 sec  
 P1 6.25 usec  
 SFO1 62.9023694 MHz  
 NUCLEUS 13C  
 D11 0.0300000 sec

F2 - Processing parameters  
 SI 32768  
 SF 62.8952445 MHz  
 WDW EM  
 SSB 0  
 LB 1.00 Hz  
 GB 0  
 PC 1.40

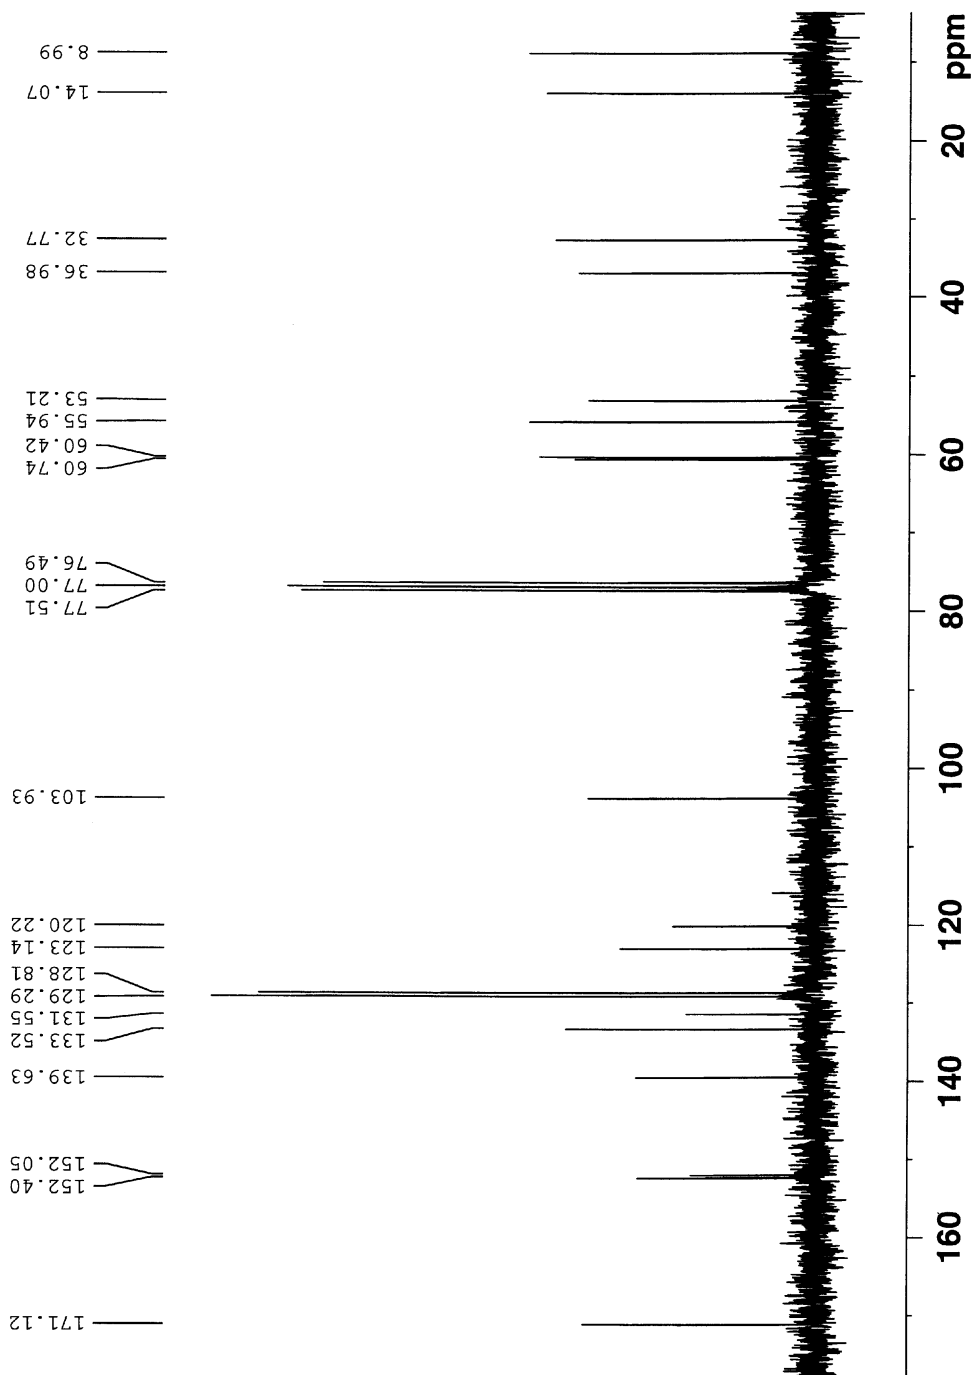

<sup>1</sup>H NMR

Current Data Parameters  
 NAME wy-IV-127-Cr  
 EXPNO 1  
 PROCNO 1

F2 - Acquisition Parameters  
 Date\_ 20090402  
 Time 11.03  
 INSTRUM DRX300  
 PROHD 5 mm Multinucl  
 PULPROG zg30pad  
 TD 32768  
 SOLVENT CDCl3  
 NS 16  
 DS 2  
 SWH 6172.839 Hz  
 FIDRES 0.188380 Hz  
 AQ 2.6542580 sec  
 RG 114  
 DW 81.000 usec  
 DE 6.00 usec  
 TE 300.0 K  
 D1 1.00000000 sec  
 D31 0.00000000 sec

===== CHANNEL f1 =====  
 NUC1 <sup>1</sup>H  
 P1 7.05 usec  
 PL1 0.00 dB  
 SFO1 300.1318534 MHz

F2 - Processing parameters  
 SI 32768  
 SF 300.1300018 MHz  
 WDW EM  
 SSB 0  
 LB 0.30 Hz  
 GB 0  
 PC 1.30

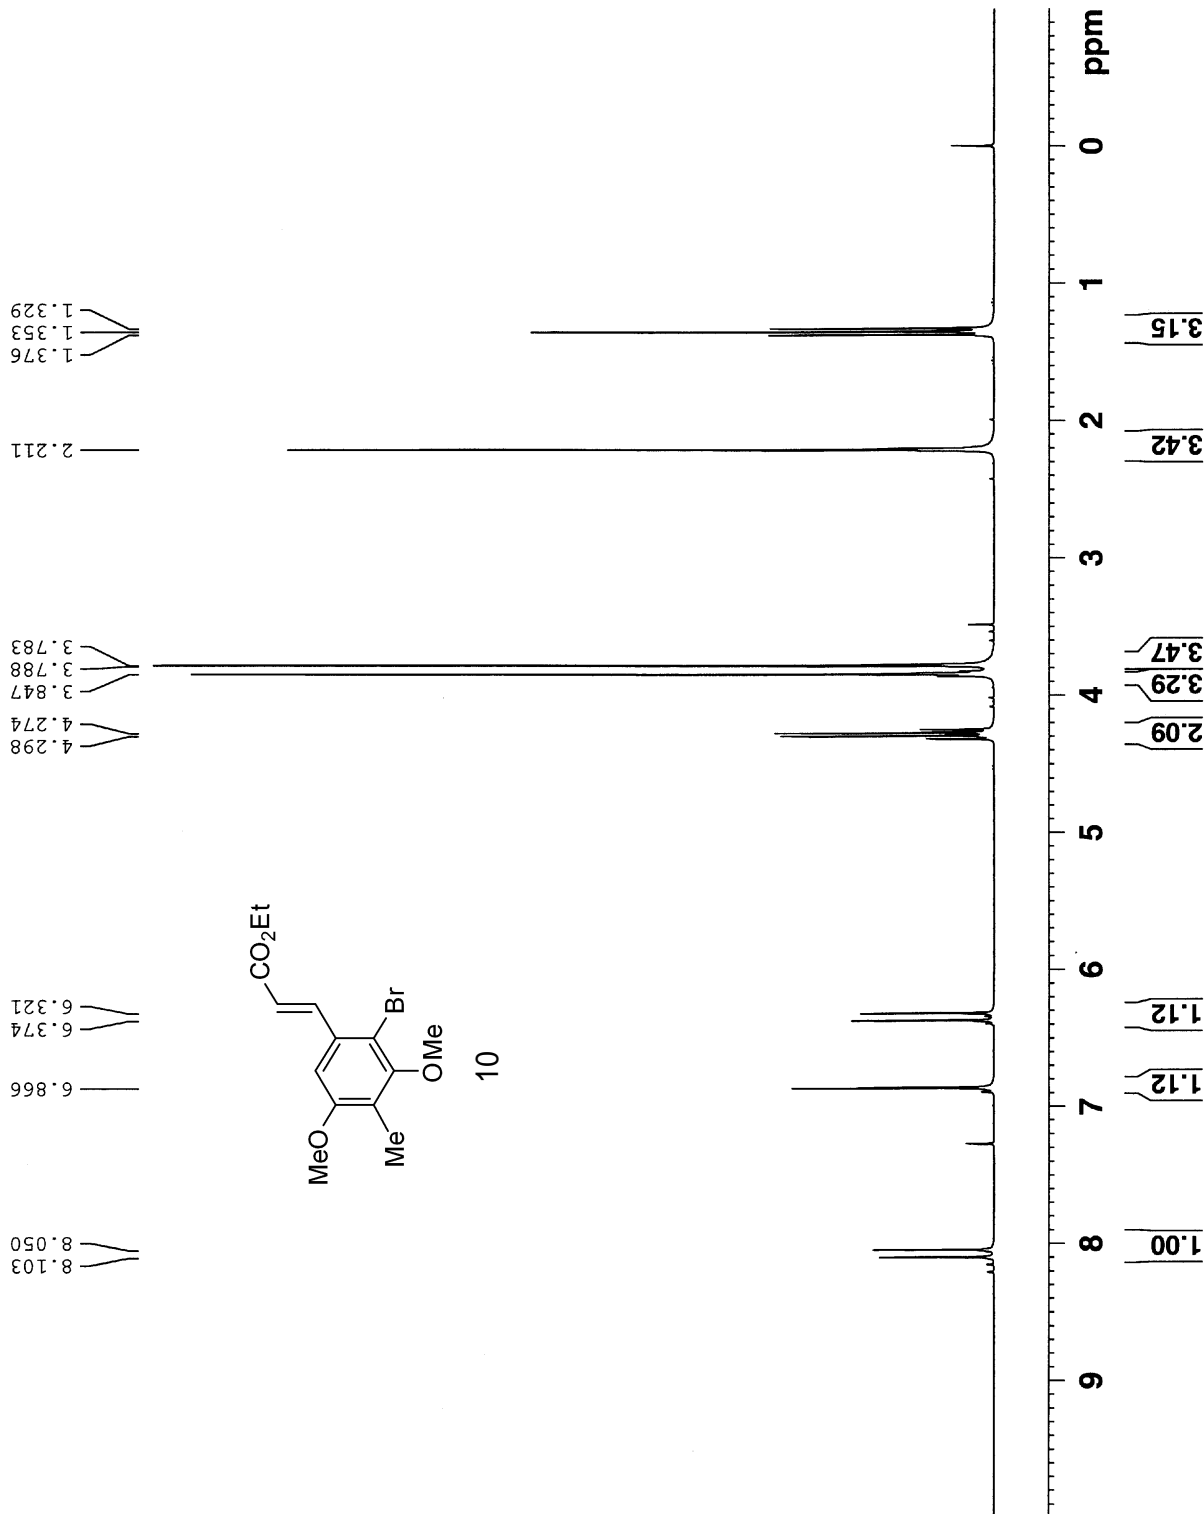

<sup>13</sup>C NMR

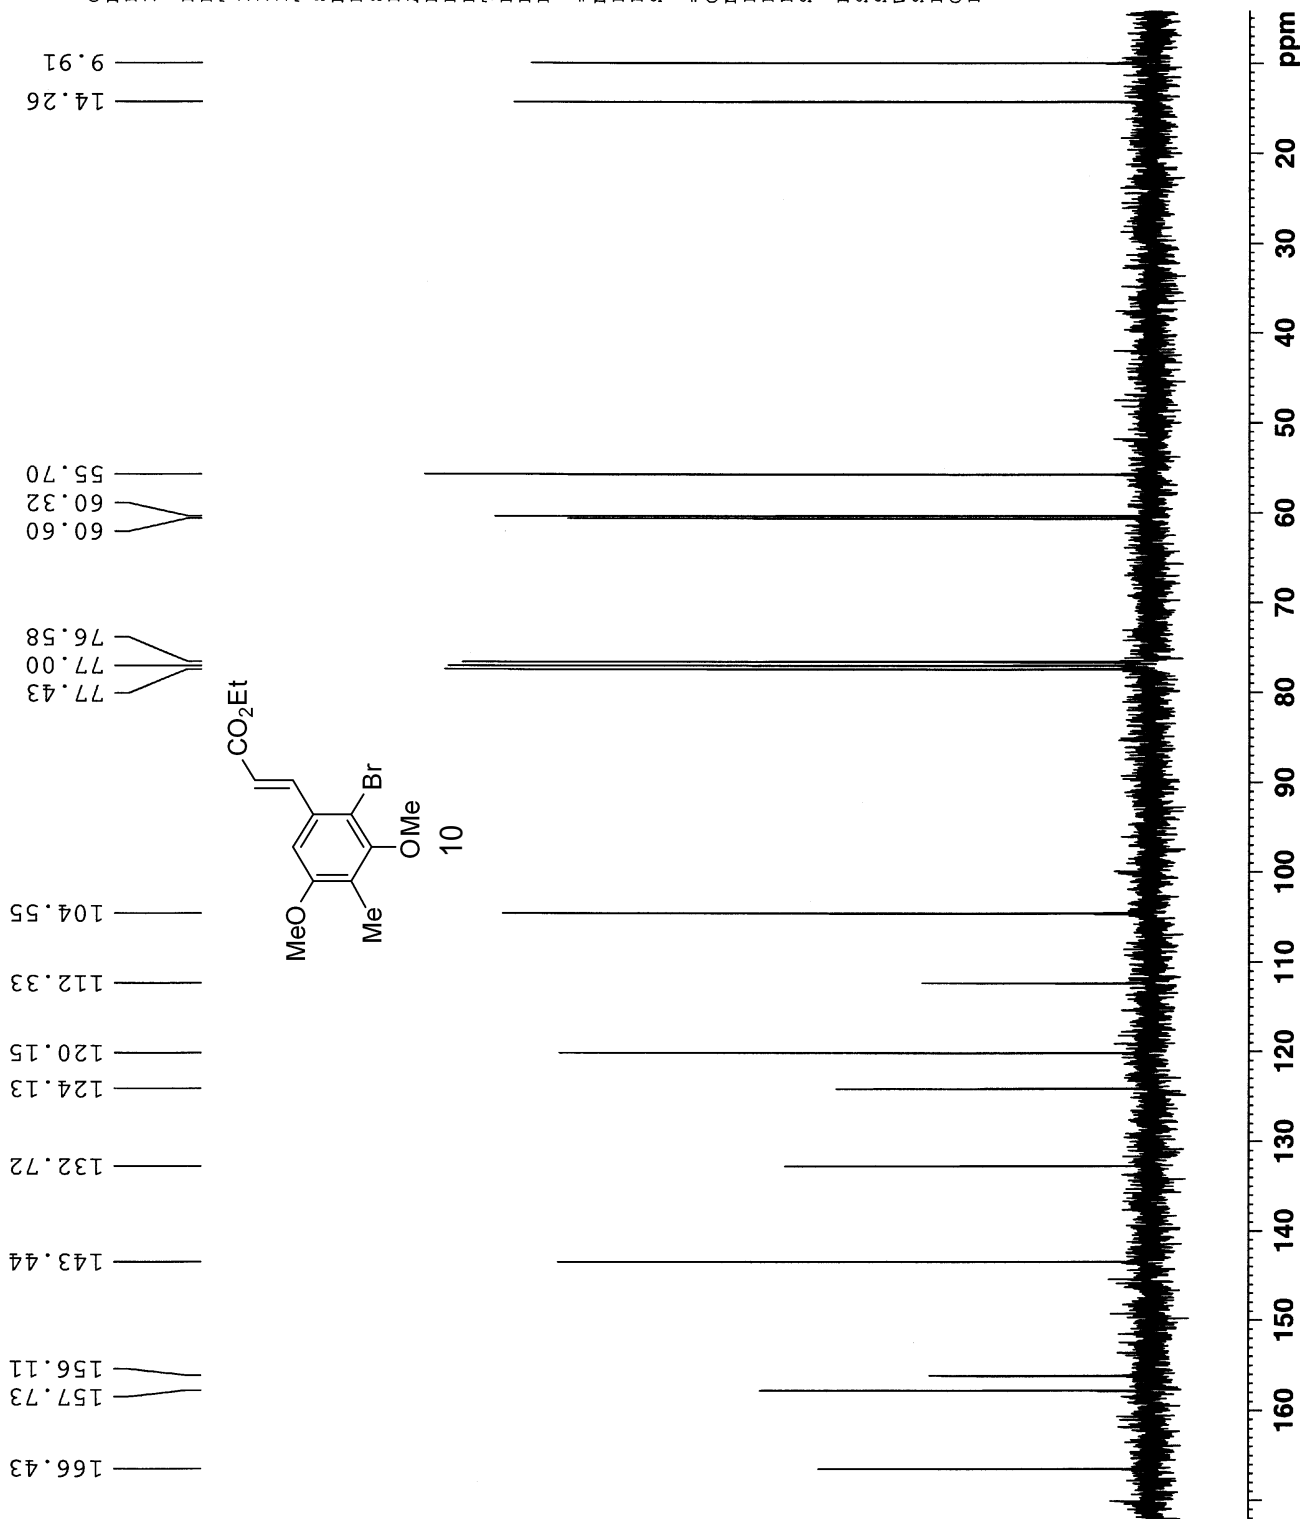

Current Data Parameters  
 NAME wy-IV-127-Cr  
 EXPNO 2  
 PROCNO 1

F2 - Acquisition Parameters  
 Date\_ 20090402  
 Time 11.08  
 INSTRUM DRX300  
 PROBHD 5 mm Multinucl  
 PULPROG zgpg30pad  
 TD 65536  
 SOLVENT CDCl3  
 NS 57  
 DS 4  
 SWH 18832.393 Hz  
 FIDRES 0.287360 Hz  
 AQ 1.7400308 sec  
 RG 22528  
 DW 26.550 usec  
 DE 6.00 usec  
 TE 300.0 K  
 D1 2.00000000 sec  
 D11 0.03000000 sec  
 D31 0.00000000 sec

==== CHANNEL f1 =====  
 NUC1 <sup>13</sup>C  
 P1 10.00 usec  
 PL1 5.00 dB  
 SFO1 75.4760107 MHz

==== CHANNEL f2 =====  
 CPDPRG2 waltz16  
 NUC2 <sup>1</sup>H  
 P2 100.00 usec  
 PL2 120.00 dB  
 PL12 21.41 dB  
 SFO2 300.1312005 MHz

F2 - Processing parameters  
 SI 32768  
 SF 75.4677537 MHz  
 WDW EM  
 SSB 0  
 LB 1.00 Hz  
 GB 0  
 PC 1.40

# <sup>1</sup>H NMR

-0.000

3.849  
3.749  
3.592  
3.574  
3.558  
3.530  
3.515  
3.433  
3.409  
3.393  
3.322  
3.193  
3.178  
3.149  
2.719  
2.222  
2.201  
2.175  
2.153  
1.764  
1.738  
1.718  
1.693

8.060  
8.036  
8.031  
7.638  
7.622  
7.613  
7.606  
7.593  
7.589  
7.585  
7.546  
7.525  
7.520  
7.502  
7.497  
7.493  
7.272  
6.484

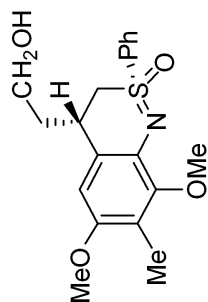

Current Data Parameters  
NAME wy-VI-8-A2  
EXPNO 1  
PROCNO 1  
F2 - Acquisition Parameters  
Date\_ 20090504  
Time 23.25  
INSTRUM DRX300  
PROBHD 5 mm Multinucl  
PULPROG zg30pad  
TD 32768  
SOLVENT CDC13  
NS 16  
DS 2  
SWH 6172.839 Hz  
FIDRES 0.188380 Hz  
AQ 2.6542580 sec  
RG 28.5  
DW 81.000 usec  
DE 6.00 usec  
TE 300.0 K  
D1 1.00000000 sec  
D31 0.00000000 sec  
===== CHANNEL f1 =====  
NUC1 1H  
P1 7.05 usec  
PL1 0.00 dB  
SFO1 300.1318534 MHz  
F2 - Processing parameters  
SI 32768  
SF 300.1300026 MHz  
WDW EM  
SSB 0  
LB 0.30 Hz  
GB 0  
PC 1.40

ppm

1

1.04

4.19

1.01

1.03

1.15

3.08

3.24

3.04

1.00

2.14

1.02

2.03

1.00

2.14

1.02

2.03

1.00

2.14

1.02

2.03

<sup>13</sup>C NMR

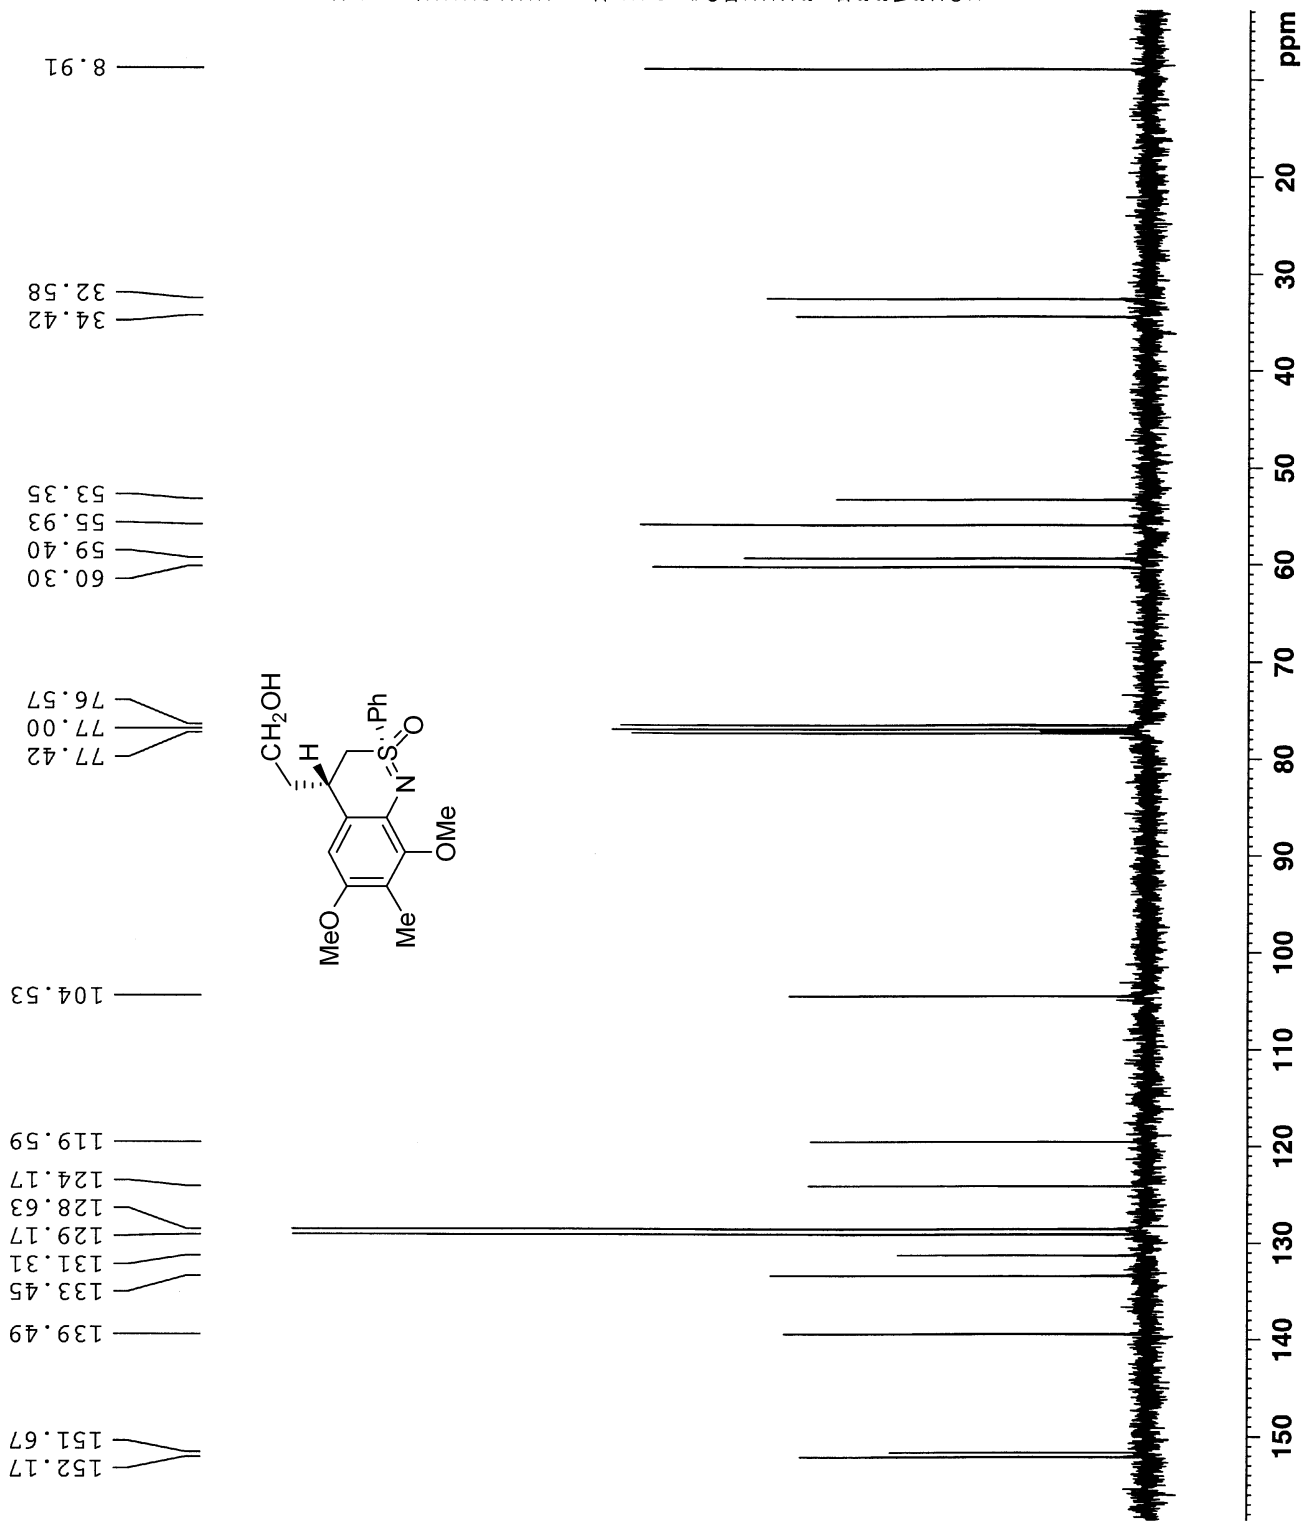

# <sup>1</sup>H NMR

3.761  
3.713  
3.617  
3.599  
3.580  
3.573  
3.554  
3.535  
3.299  
3.284

2.135

1.553  
1.537  
1.314  
1.286

6.442

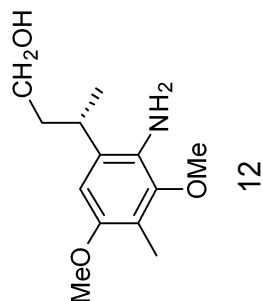

Current Data Parameters  
NAME wy-X-54-A2  
EXPNO 1  
PROCNO 1

F2 - Acquisition Parameters  
Date\_ 20080715  
Time 16.53  
INSTRUM air250  
PROBHD 5 mm QNP 1H  
PULPROG zg30  
TD 32768  
SOLVENT CDCl3  
NS 16  
DS 2  
SWH 5208.333 Hz  
FIDRES 0.158946 Hz  
AQ 3.1457779 sec  
RG 512  
DW 96.000 usec  
DE 137.14 usec  
TE 300.0 K  
D1 1.00000000 sec  
P1 9.50 usec  
SFO1 250.1315321 MHz  
NUCLEUS 1H

F2 - Processing parameters  
SI 16384  
SF 250.1300073 MHz  
WDW EM  
SSB 0  
LB 0.20 Hz  
GB 0  
PC 1.50

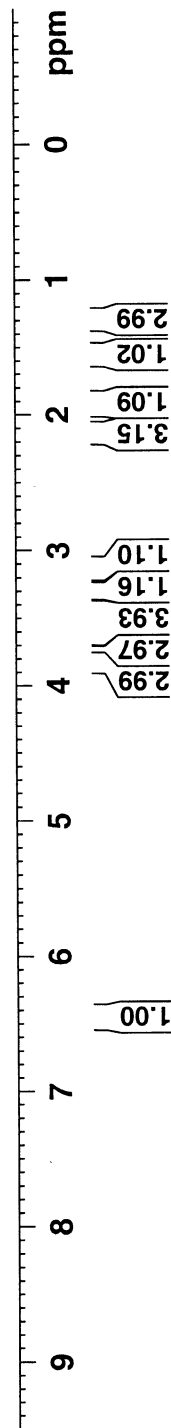

# 13C NMR

Current Data Parameters  
 NAME Wy-X-54-A2  
 EXPNO 2  
 PROCNO 1

F2 - Acquisition Parameters  
 Date\_ 20080715  
 Time 16.56  
 INSTRUM arx250  
 PROBHD 5 mm QNP 1H  
 PULPROG zgpg30  
 TD 36864  
 SOLVENT CDCl3  
 NS 111  
 DS 4  
 SWH 17241.379 Hz  
 FIDRES 0.467702 Hz  
 AQ 1.0691060 sec  
 RG 22800  
 DW 29.000 usec  
 DE 41.43 usec  
 TE 300.0 K  
 D12 0.00002000 sec  
 DLS 23.00 dB  
 CPDPRG waltz16  
 P31 103.00 usec  
 D1 2.00000000 sec  
 P1 8.00 usec  
 SFO1 62.9023694 MHz  
 NUCLEUS 13C  
 D11 0.03000000 sec

F2 - Processing parameters  
 SI 32768  
 SF 62.8952284 MHz  
 WDW EM  
 SSB 0  
 LB 1.00 Hz  
 GB 0  
 PC 1.40

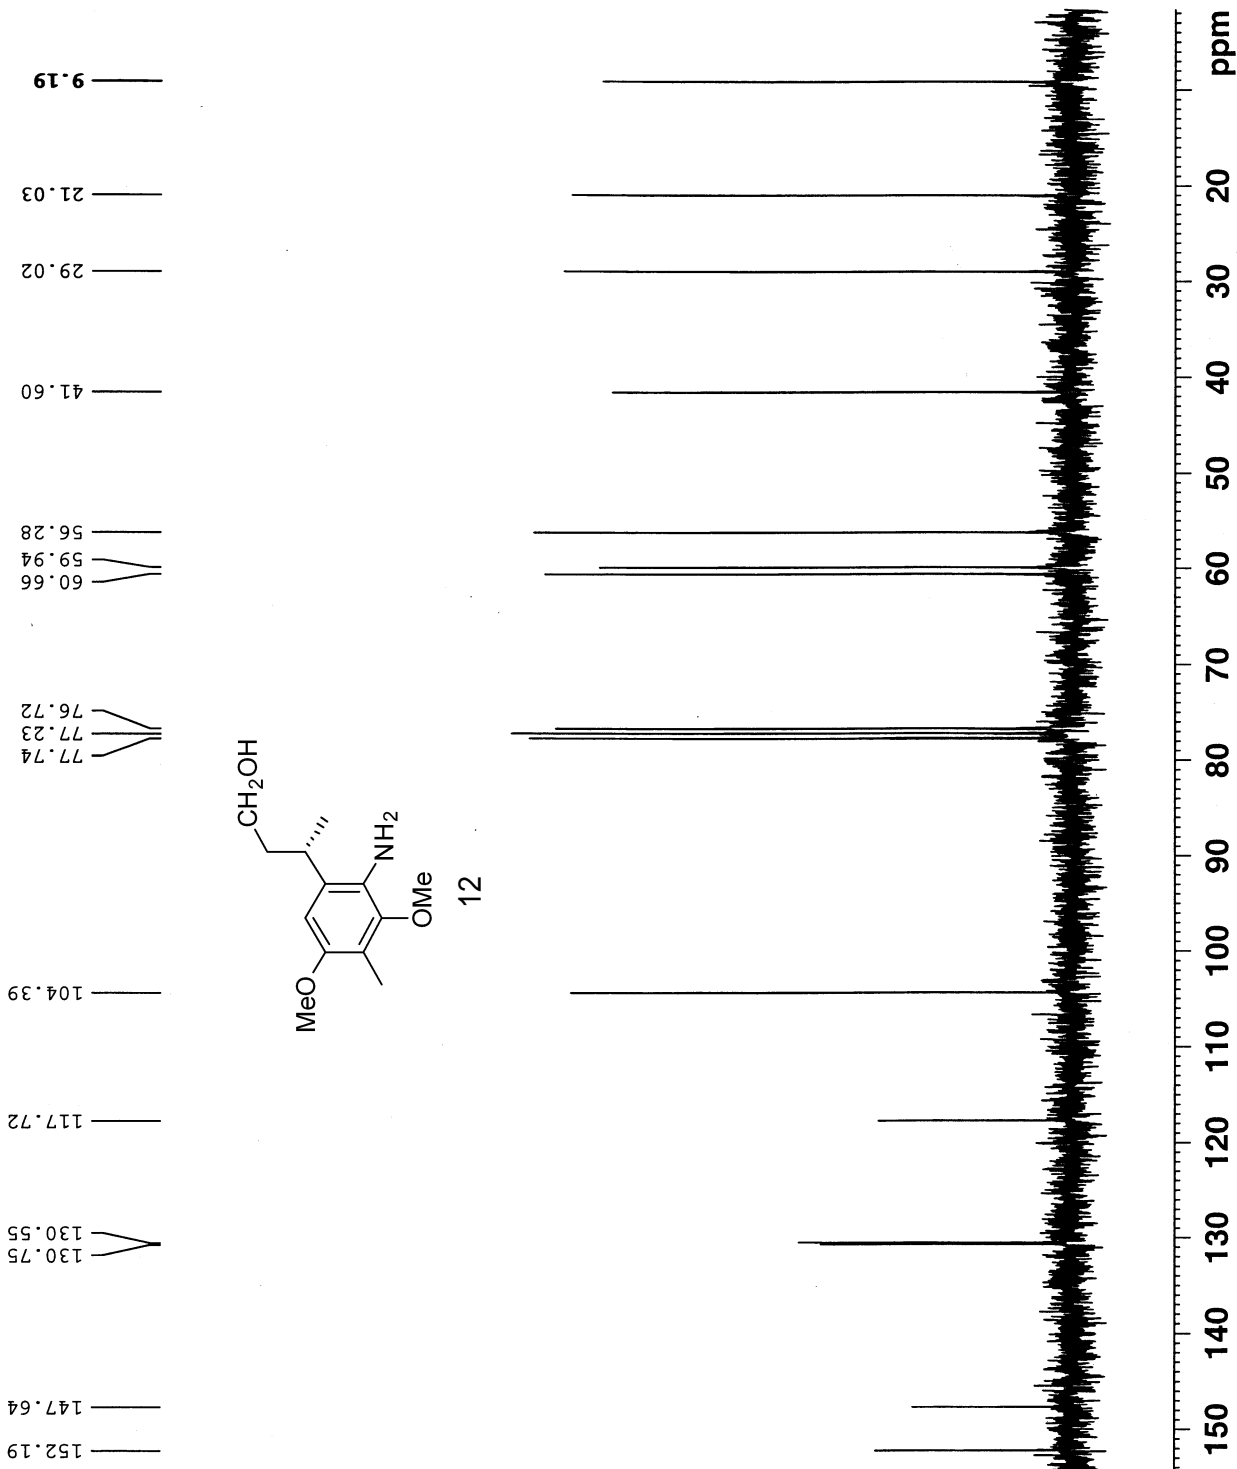

1H NMR

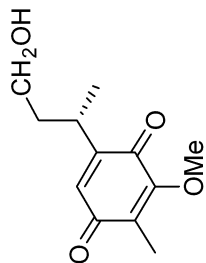

13

S-19

Current Data Parameters  
 NAME wy-X-55-A  
 EXPNO 1  
 PROCNO 1  
 F2 - Acquisition Parameters  
 Date\_ 20080716  
 Time 14.43  
 INSTRUM arx250  
 PROBHD 5 mm QNP 1H  
 PULPROG zg30  
 TD 32768  
 SOLVENT CDCl3  
 NS 16  
 DS 2  
 SWH 5208.333 Hz  
 FIDRES 0.158946 Hz  
 AQ 3.1457779 sec  
 RG 256  
 DW 96.000 usec  
 DE 137.14 usec  
 TE 300.0 K  
 D1 1.0000000 sec  
 P1 9.50 usec  
 SFO1 250.1315321 MHz  
 NUCLEUS 1H  
 F2 - Processing parameters  
 SI 16384  
 SF 250.1300076 MHz  
 WDW EM  
 SSB 0  
 LB 0.20 Hz  
 GB 0  
 PC 1.50

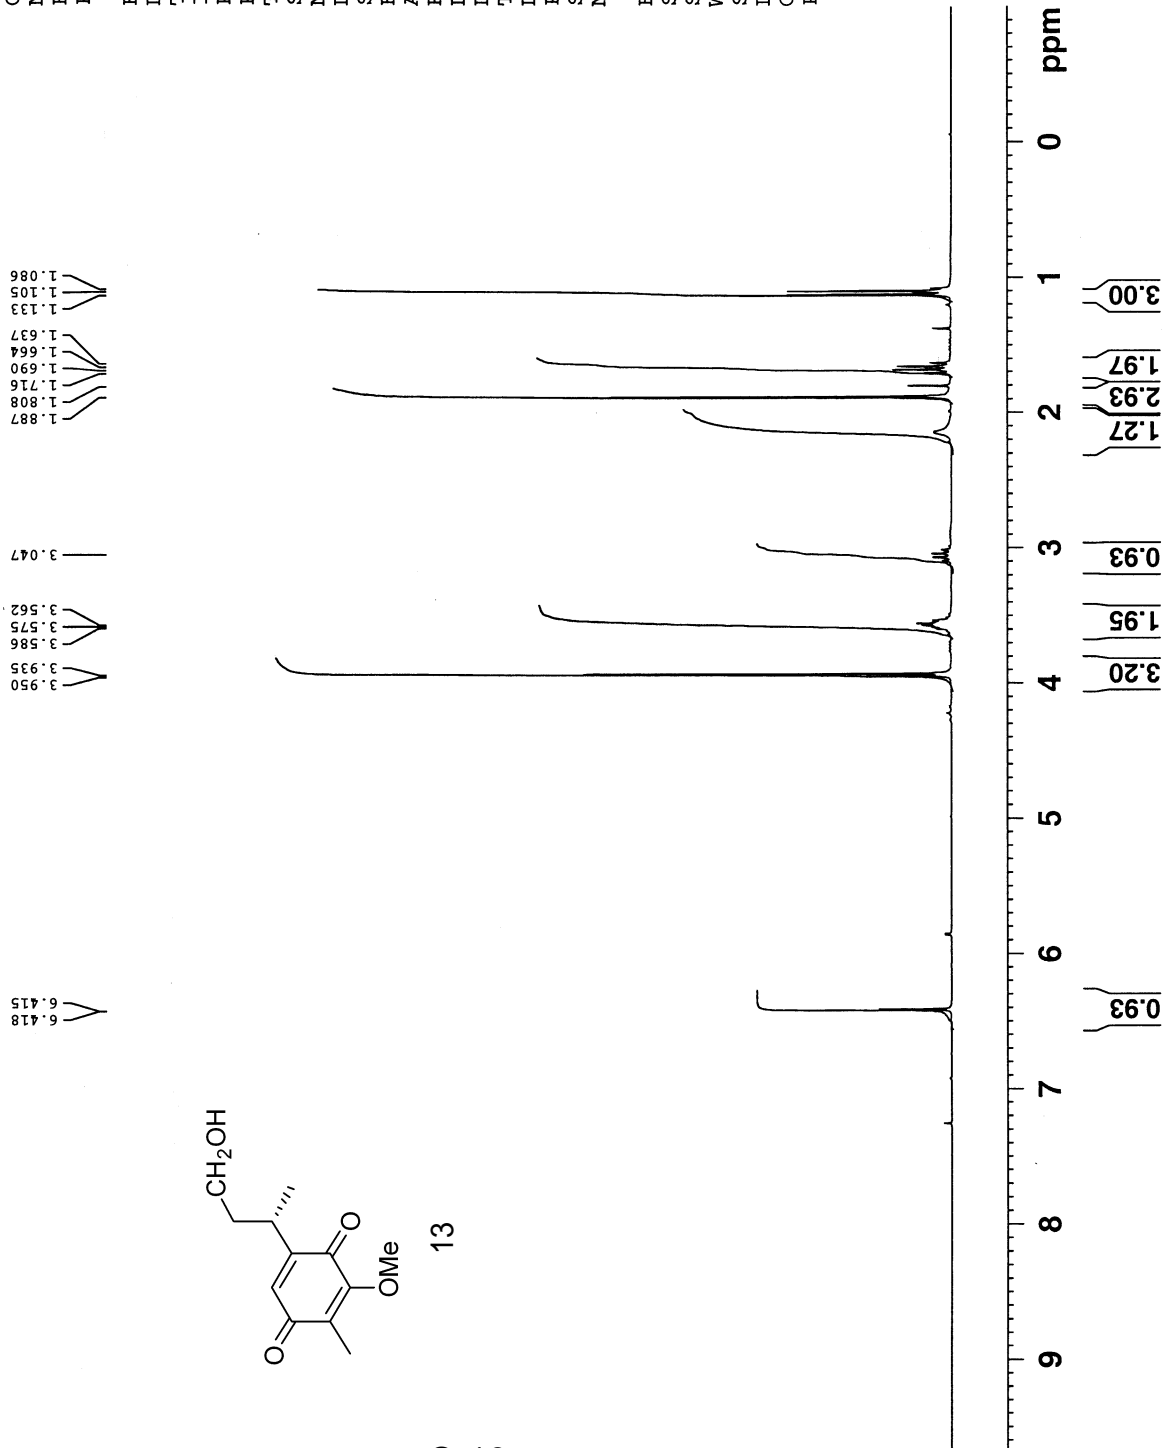

# 13C NMR

Current Data Parameters  
 NAME wy-X-55-A  
 EXPNO 2  
 PROCNO 1  
 F2 - Acquisition Parameters  
 Date\_ 20080716  
 Time 14.59  
 INSTRUM arx250  
 PROBHD 5 mm QNP 1H  
 PULPROG zgpg30  
 TD 36864  
 SOLVENT CDCl3  
 NS 319  
 DS 4  
 SWH 17241.379 Hz  
 FIDRES 0.467702 Hz  
 AQ 1.0691060 sec  
 RG 22800  
 DW 29.000 usec  
 DE 41.43 usec  
 TE 300.0 K  
 D12 0.00002000 sec  
 DL5 23.00 dB  
 CPDPRG waltz16  
 P31 103.00 usec  
 D1 2.0000000 sec  
 P1 8.00 usec  
 SFO1 62.9023694 MHz  
 NUCLEUS 13C  
 D11 0.0300000 sec  
 F2 - Processing parameters  
 SI 32768  
 SF 62.8952300 MHz  
 EM 0  
 LB 1.00 Hz  
 GB 0  
 PC 1.40

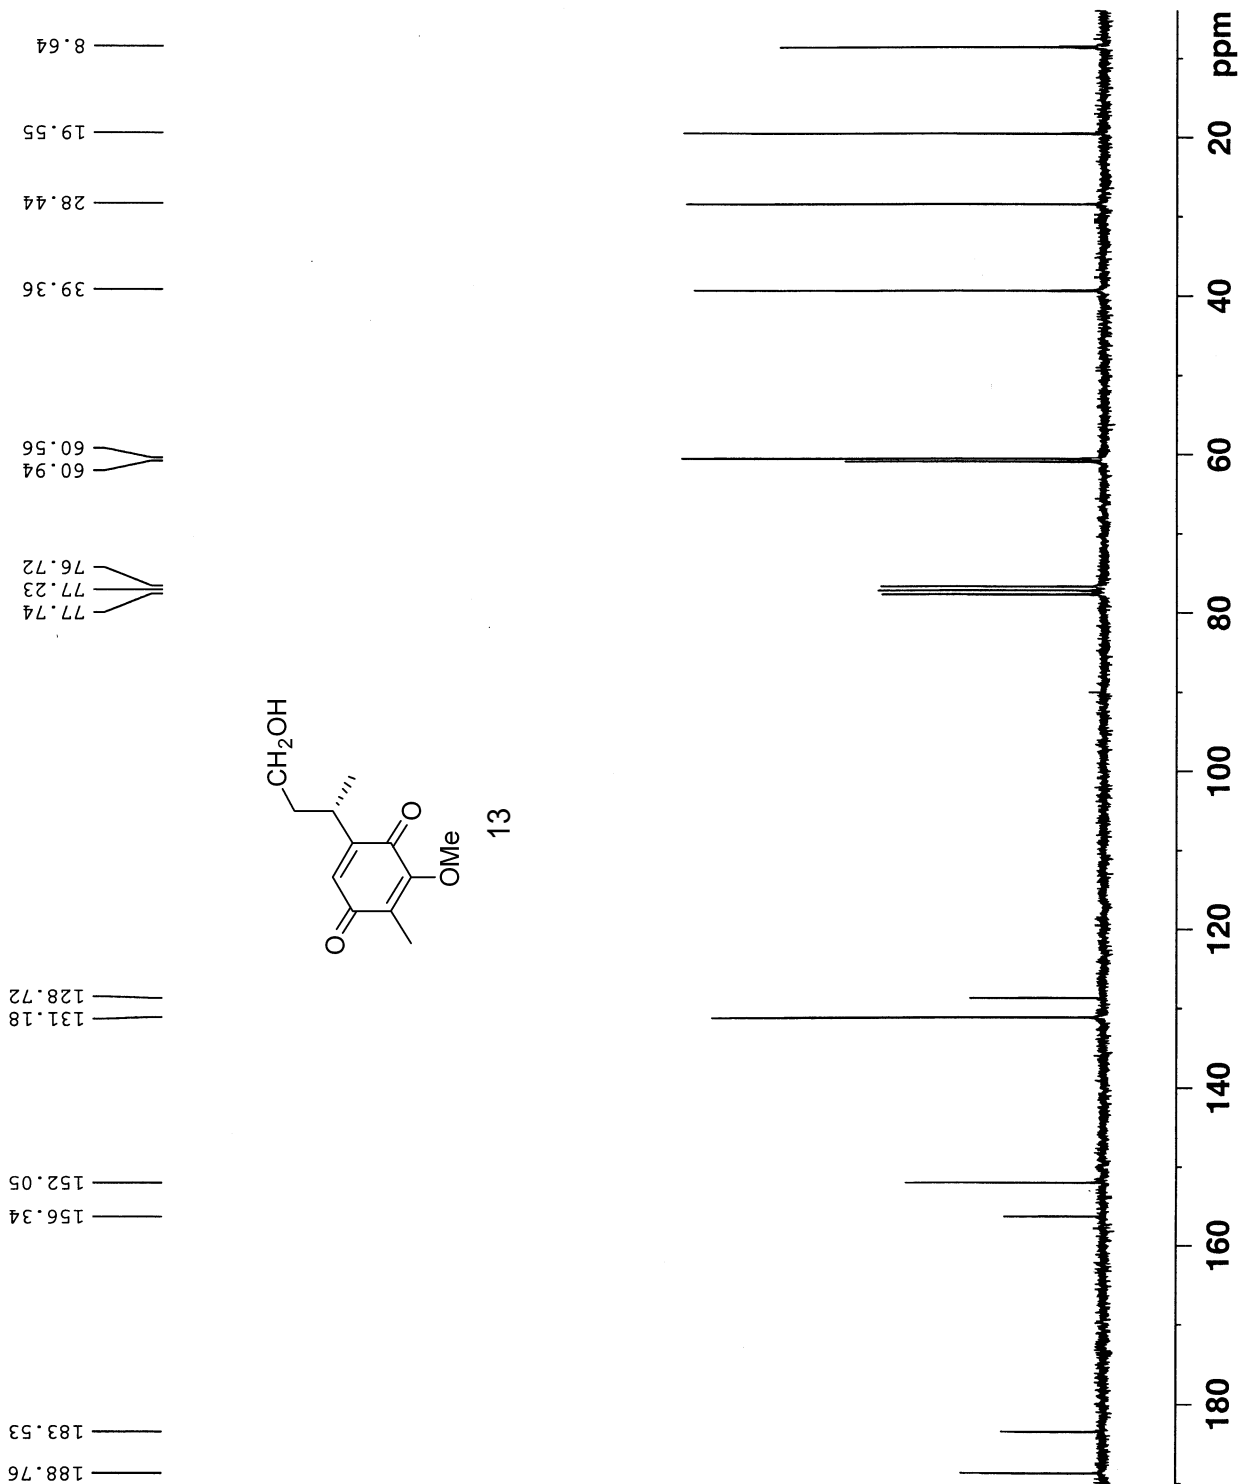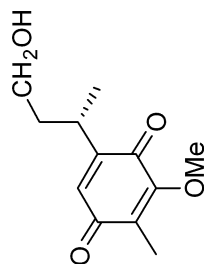

13

1H NMR

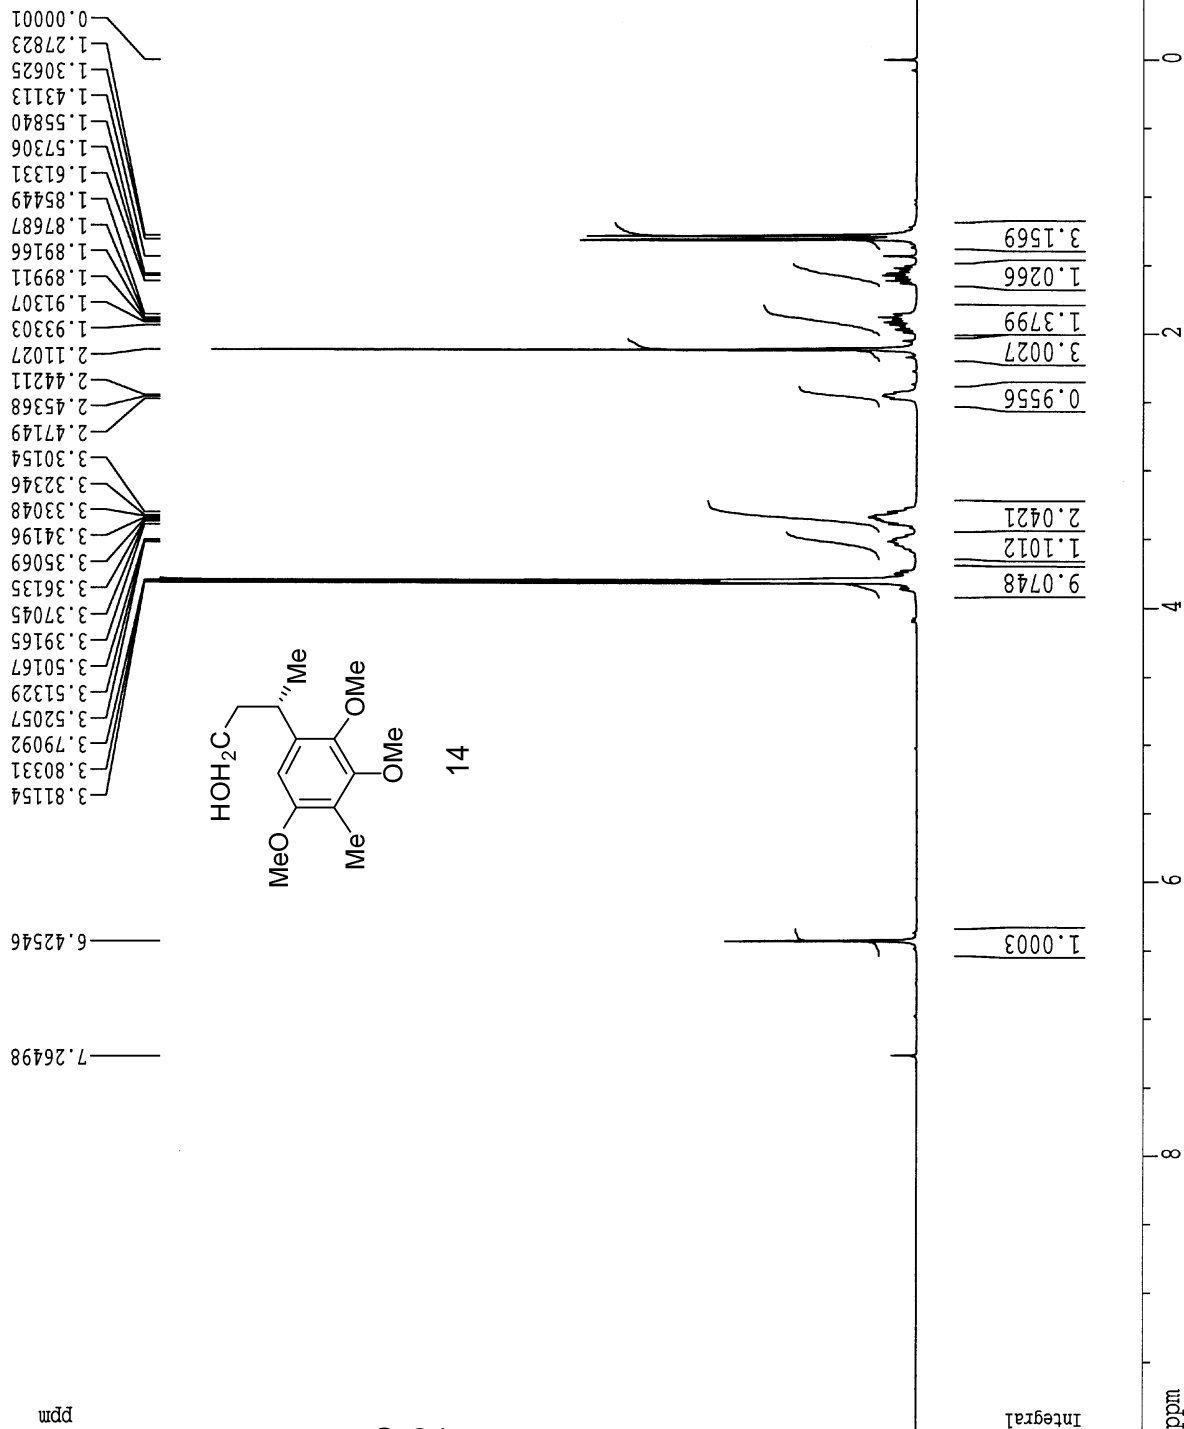

Current Data Parameters  
NAME wy-X-78-A  
EXPNO 1  
PROCNO 1

F2 - Acquisition Parameters  
Date\_ 20080731  
Time 11.31  
INSTRUM arx250  
PROBHD 5 mm QNP 1H  
PULPROG zg30  
TD 32768  
SOLVENT CDCl3  
NS 16  
DS 2  
SWH 5208.333 Hz  
FIDRES 0.158946 Hz  
AQ 3.1457779 sec  
RG 512  
DW 96.000 usec  
DE 137.14 usec  
TE 300.0 K  
D1 1.0000000 sec  
P1 9.50 usec  
SFO1 250.1315321 MHz  
NUCLEUS 1H

F2 - Processing parameters  
SI 16384  
SF 250.1300062 MHz  
WDW EM  
SSB 0  
LB 0.20 Hz  
GB 0  
PC 1.50

1D NMR plot parameters  
CX 20.00 cm  
CY 12.50 cm  
F1P 10.000 ppm  
F1 2501.30 Hz  
F2P -1.000 ppm  
F2 -250.13 Hz  
PPMCM 0.55000 ppm/cm  
HZCM 137.57150 Hz/cm

# <sup>13</sup>C NMR

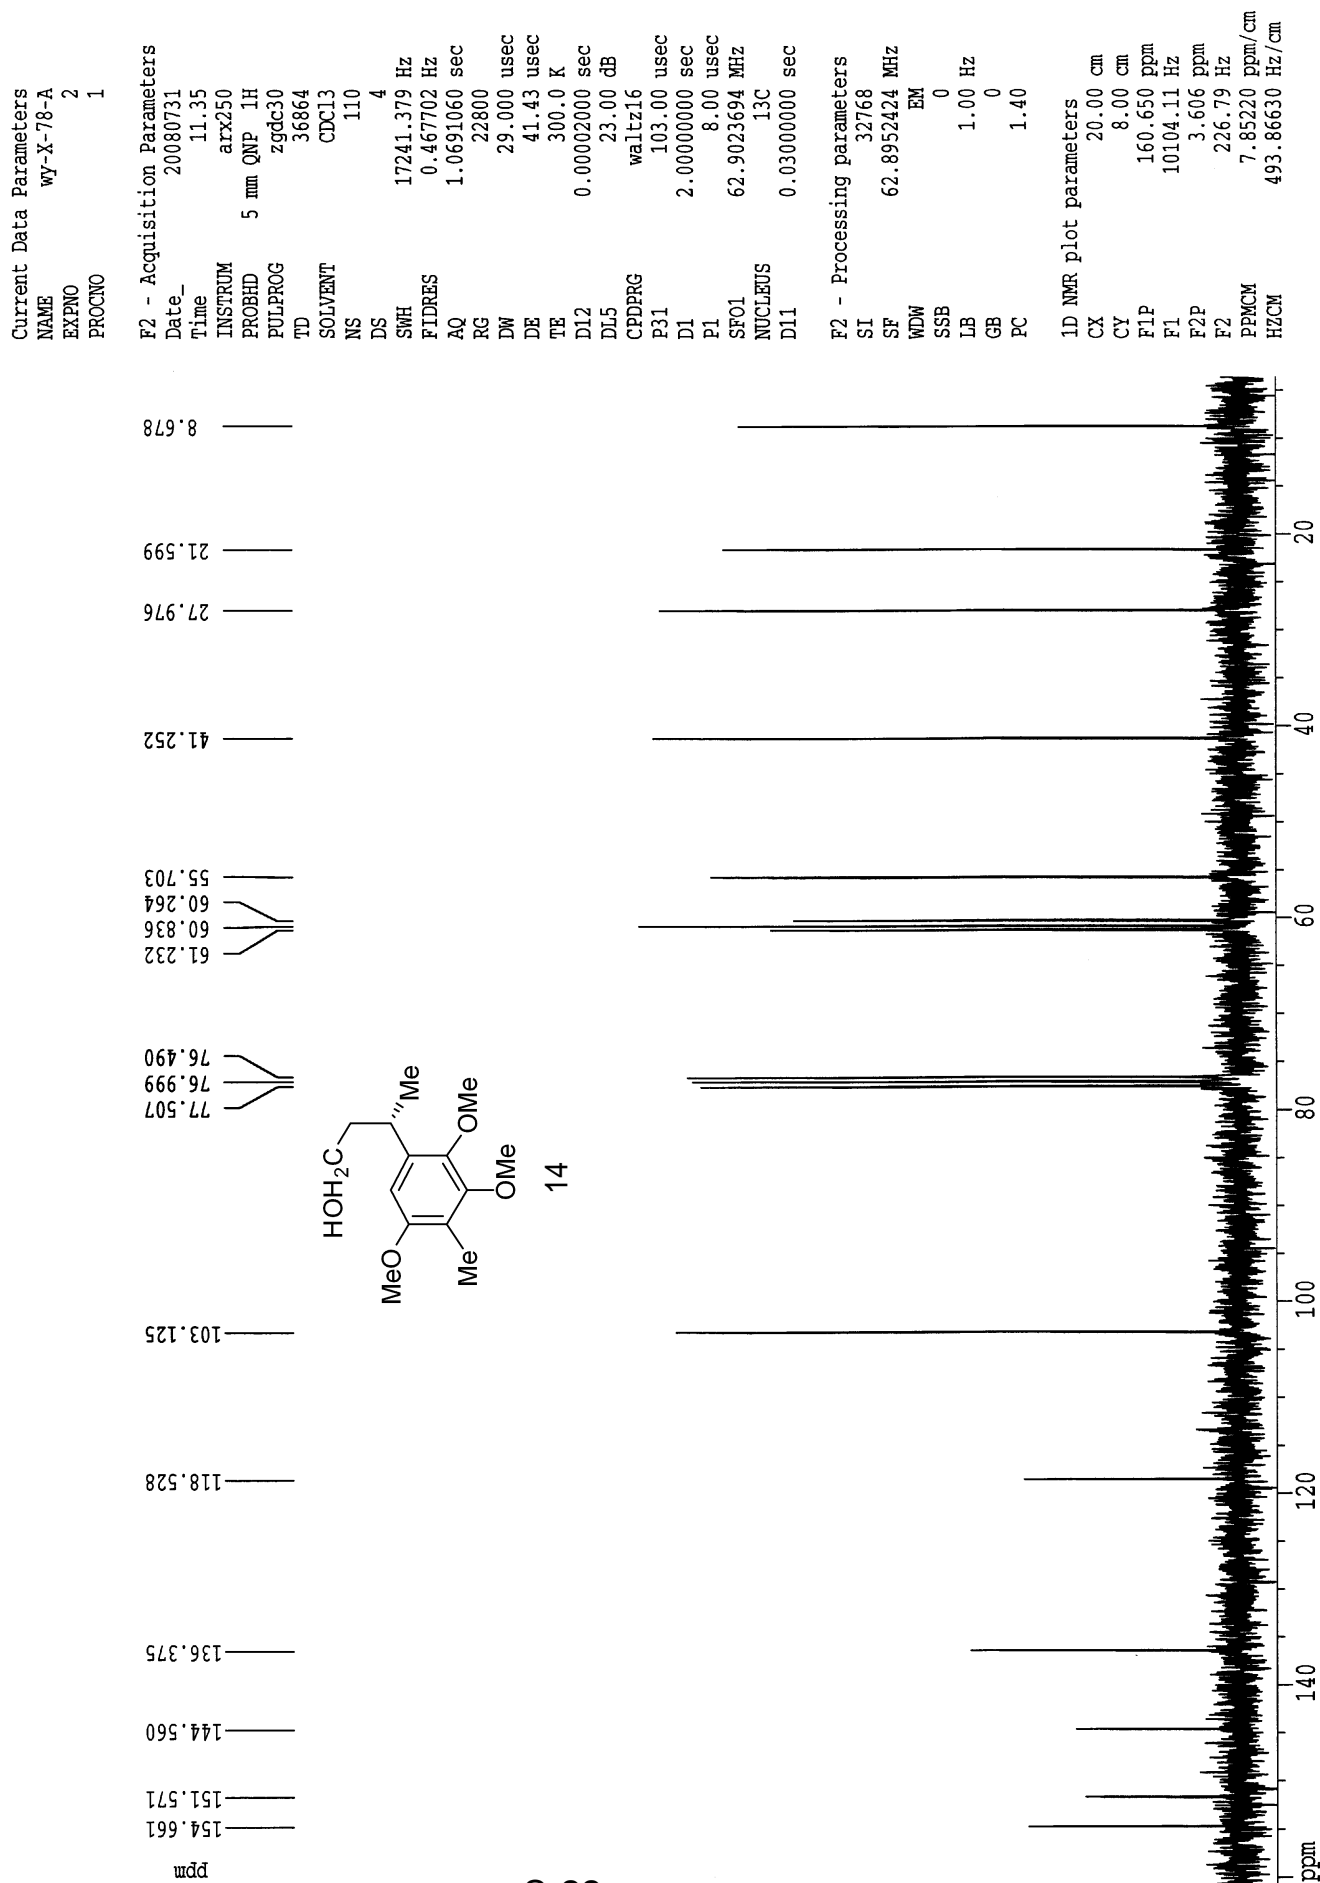

# 1H NMR

Current Data Parameters  
 NAME wy-X-124-A1  
 EXPNO 1  
 PROCNO 1

F2 - Acquisition Parameters  
 Date\_ 20080925  
 Time 15.24  
 INSTRUM arx250  
 PROBHD 5 mm QNP 1H  
 PULPROG zg30  
 TD 32768  
 SOLVENT CDC13  
 NS 16  
 DS 2  
 SWH 5208.333 Hz  
 FIDRES 0.158946 Hz  
 AQ 3.145779 sec  
 RG 128  
 DW 96.000 usec  
 DE 137.14 usec  
 TE 300.0 K  
 D1 1.0000000 sec  
 P1 9.50 usec  
 SF01 250.1315321 MHz  
 NUCLEUS 1H

F2 - Processing parameters  
 SI 16384  
 SF 250.1300048 MHz  
 WDW EM  
 SSB 0  
 LB 0.20 Hz  
 GB 0  
 PC 1.50

1D NMR plot parameters  
 CX 20.00 cm  
 CY 8.00 cm  
 F1P 10.000 ppm  
 F1 2501.30 Hz  
 F2P -1.000 ppm  
 F2 -250.13 Hz  
 PPMCM 0.55000 ppm/cm  
 HZCM 137.57152 Hz/cm

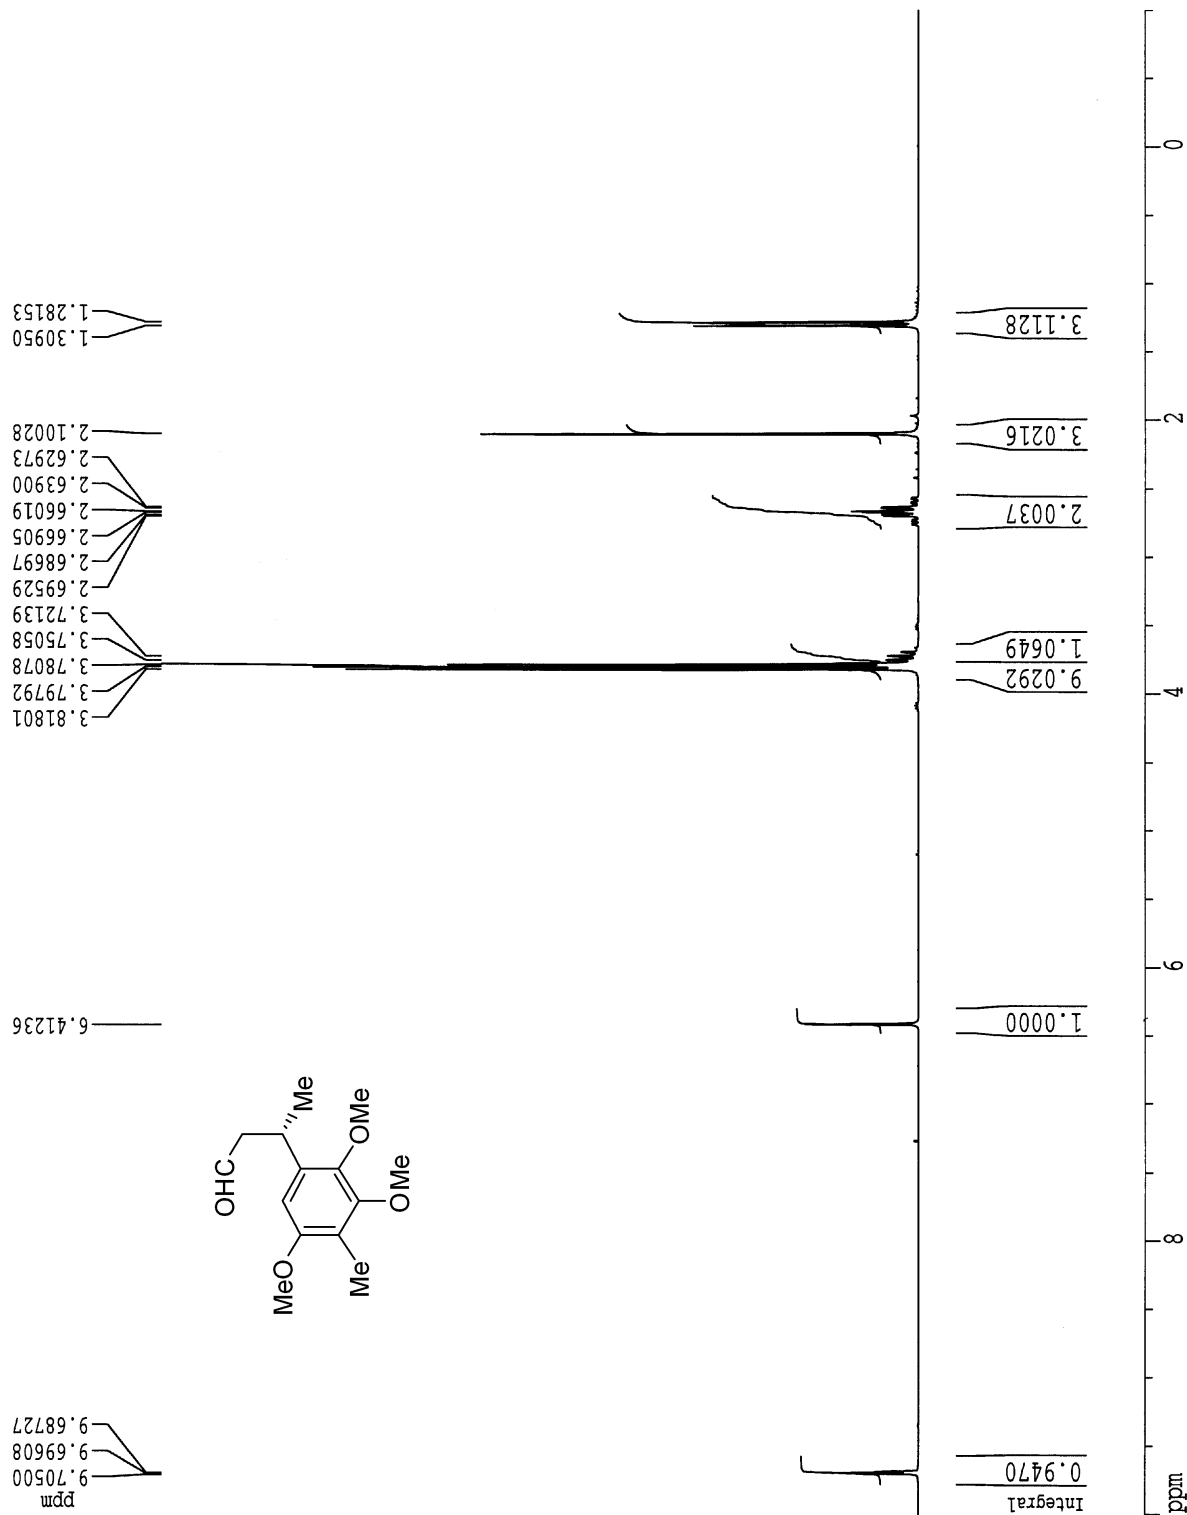

# 13C NMR

Current Data Parameters  
 NAME wy-X-124-A1  
 EXPNO 2  
 PROCNO 1

## F2 - Acquisition Parameters

Date\_ 20080925  
 Time 15.28  
 INSTRUM arx250  
 PROBHD 5 mm QNP 1H  
 PULPROG zgpg30  
 TD 36864  
 SOLVENT CDC13  
 NS 51  
 DS 4  
 SWH 17241.379 Hz  
 FIDRES 0.467702 Hz  
 AQ 1.0691060 sec  
 RG 22800  
 DW 29.000 usec  
 DE 41.43 usec  
 TE 300.0 K  
 D12 0.0002000 sec  
 DL5 23.00 dB  
 CPDPRG waltz16  
 P31 103.00 usec  
 D1 2.0000000 sec  
 P1 8.00 usec  
 SFO1 62.9023694 MHz  
 NUCLEUS 13C  
 D11 0.0300000 sec

## F2 - Processing parameters

SI 32768  
 SF 62.8952482 MHz  
 WDW EM  
 SSB 0  
 LB 1.00 Hz  
 GB 0  
 PC 1.40

## 1D NMR plot parameters

CX 20.00 cm  
 CY 10.00 cm  
 F1P 212.128 ppm  
 F1 13341.84 Hz  
 F2 4.455 ppm  
 F2 280.19 Hz  
 PPMCM 10.38365 ppm/cm  
 HZCM 653.08252 Hz/cm

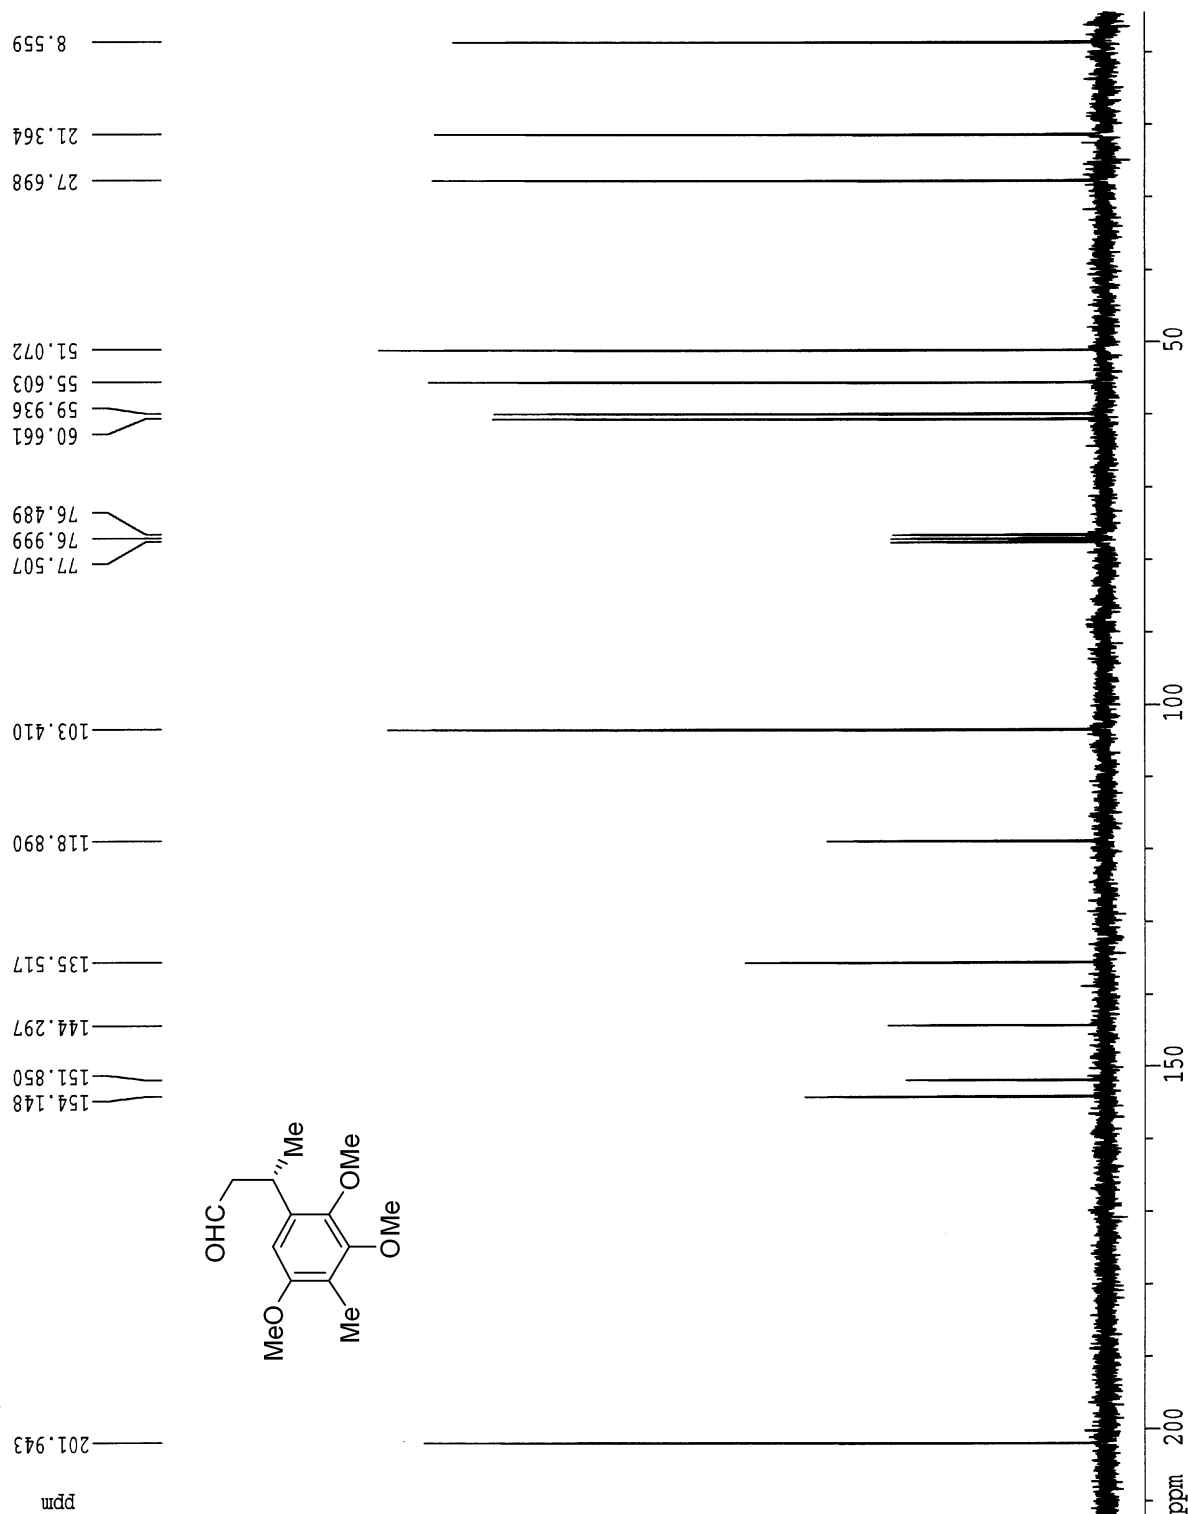

<sup>1</sup>H NMR

7.270  
6.486  
6.426  
6.303  
6.278  
5.887  
5.874  
4.712  
4.697  
4.686  
4.682  
4.672  
4.656  
4.312  
4.298  
3.828  
3.806  
3.799  
3.794  
3.567  
3.477  
3.207  
3.193  
3.182  
3.179  
3.168  
3.154  
3.140  
2.377  
2.364  
2.362  
2.349  
2.347  
2.334  
2.333  
2.235  
2.221  
2.207  
2.194  
2.143  
2.123  
2.119  
2.099  
1.621  
1.445

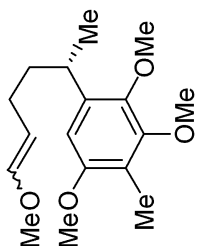

Current Data Parameters  
NAME wy-X-125-A2  
EXPNO 1  
PROCNO 1

F2 - Acquisition Parameters  
Date\_ 20080928  
Time 16.07  
INSTRUM DRX500  
PROBHD 5 mm CPTCI 1H-  
PULPROG zg30  
TD 65536  
SOLVENT CDCl3  
NS 8  
DS 2  
SWH 10330.578 Hz  
FIDRES 0.157632 Hz  
AQ 3.1719923 sec  
RG 14.3  
DW 48.400 usec  
DE 6.00 usec  
TE 300.0 K  
D1 1.00000000 sec  
MCREST 0.00000000 sec  
MCWRK 0.01500000 sec

==== CHANNEL f1 =====  
NUC1 1H  
P1 8.00 usec  
PL1 4.30 dB  
SFO1 500.1335009 MHz

F2 - Processing parameters  
SI 32768  
WDW EM  
SSB 0  
LB 0.30 Hz  
GB 0  
PC 1.00

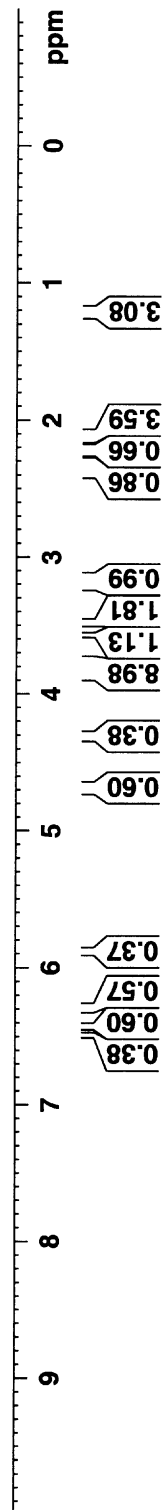

13C NMR

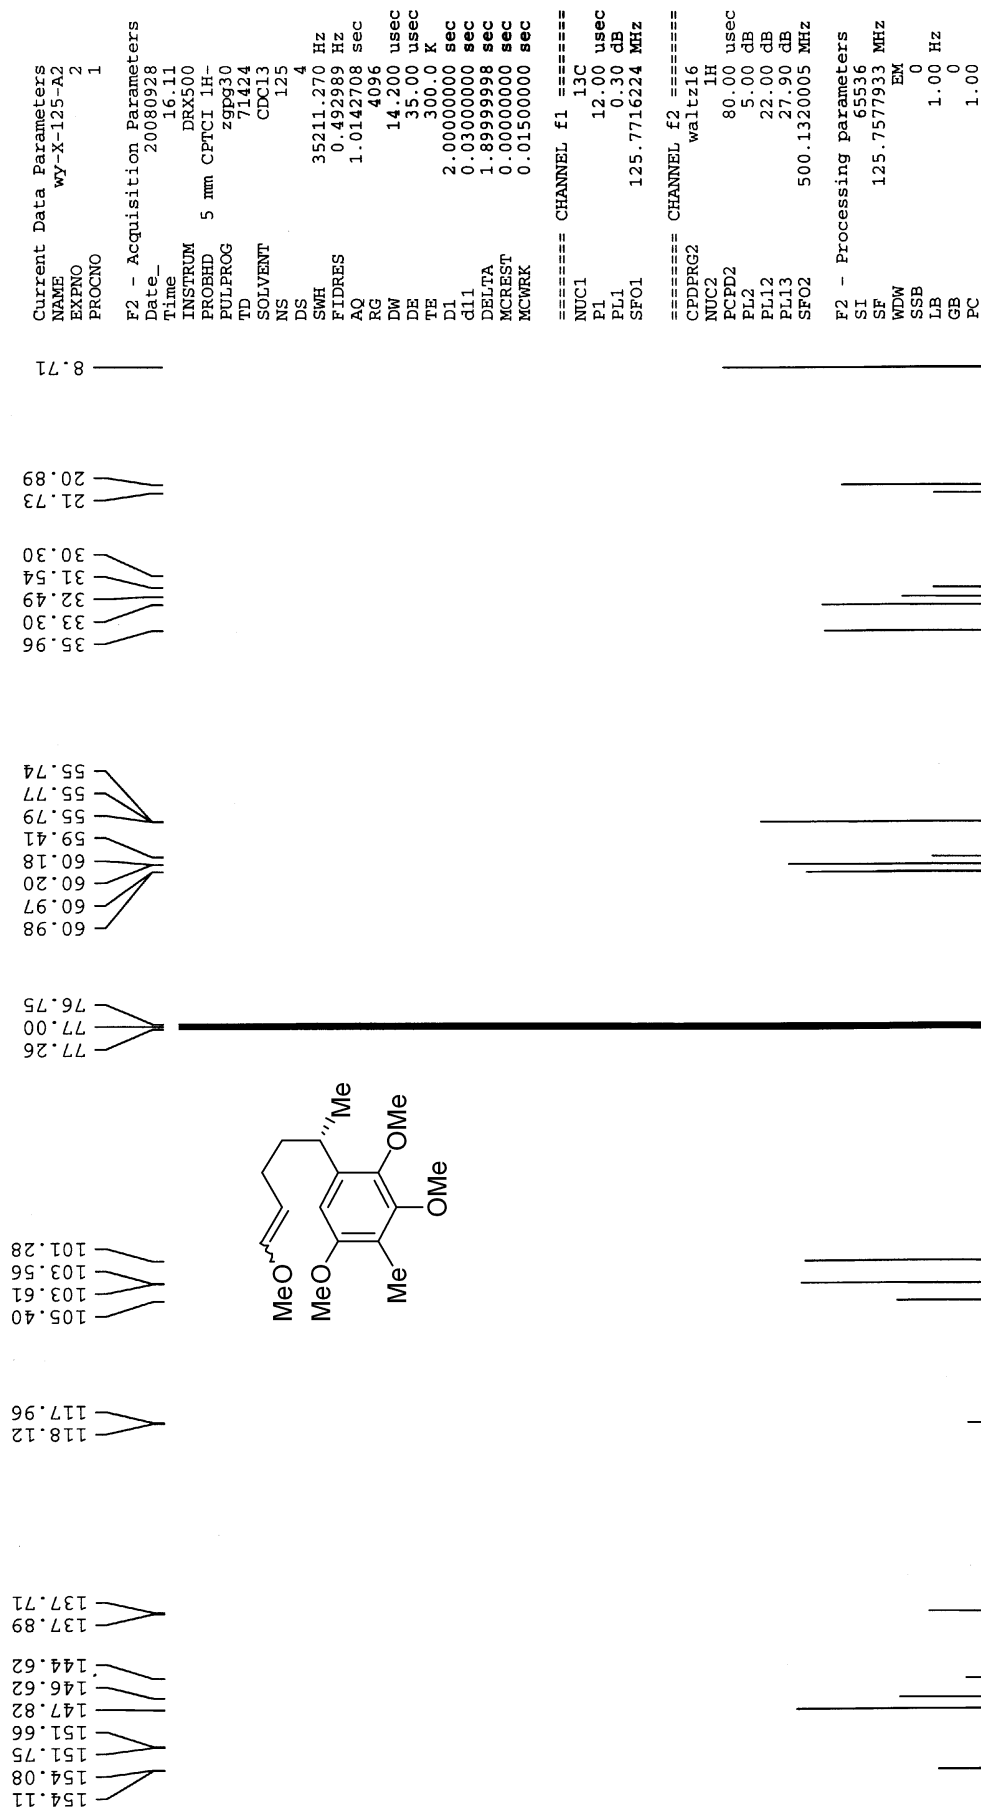

1H NMR

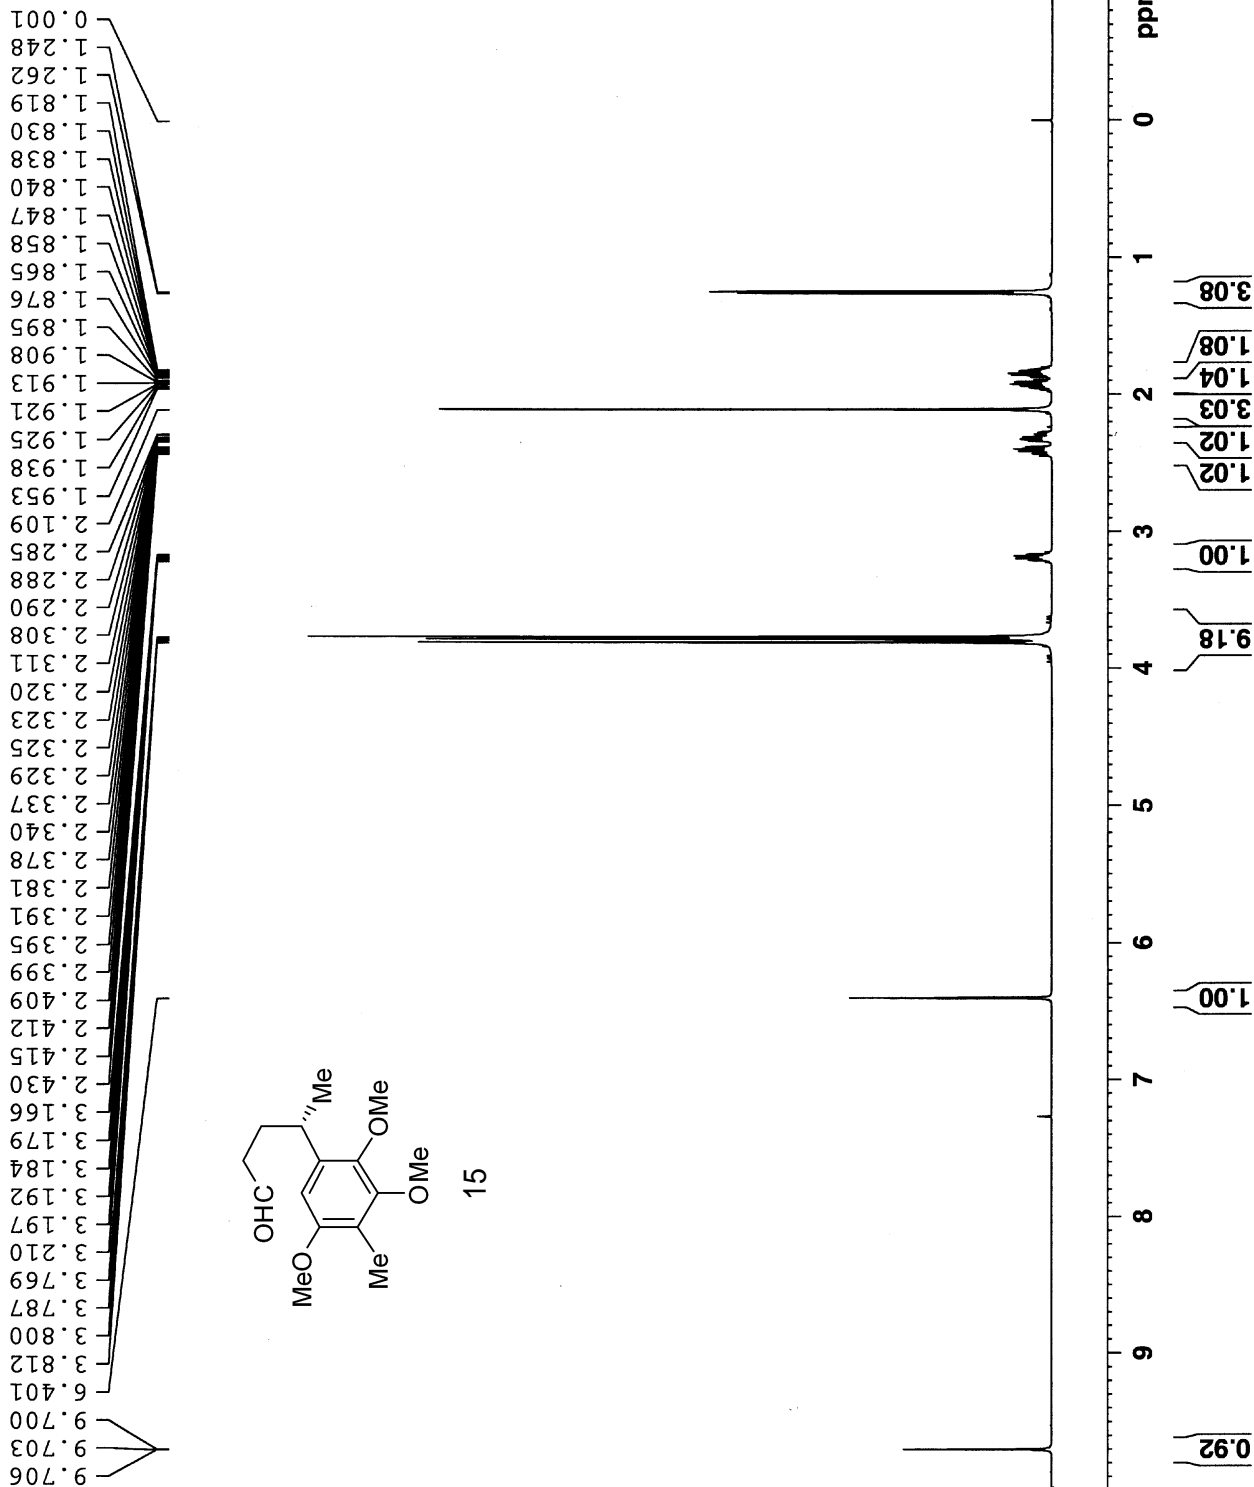

Current Data Parameters  
 NAME wy-X-126-A2  
 EXNO 1  
 PROCNO 1

F2 - Acquisition Parameters  
 Date\_ 20080928  
 Time 22.31  
 INSTRUM DRX500  
 PROBHD 5 mm CPTCI 1H-  
 PULPROG zg30  
 TD 65536  
 SOLVENT CDCl3  
 NS 8  
 DS 2  
 SWH 10330.578 Hz  
 FIDRES 0.157632 Hz  
 AQ 3.1719923 sec  
 RG 9  
 DW 48.400 usec  
 DE 6.00 usec  
 TE 300.0 K  
 D1 1.00000000 sec  
 MCREST 0.00000000 sec  
 MCWRK 0.01500000 sec

==== CHANNEL f1 =====  
 NUC1 1H  
 P1 8.00 usec  
 PL1 4.30 dB  
 SF01 500.1335009 MHz

F2 - Processing parameters  
 SI 32768  
 SF 500.1300087 MHz  
 WDW EM  
 SSB 0  
 LB 0.30 Hz  
 GB 0  
 PC 1.00

# <sup>13</sup>C NMR

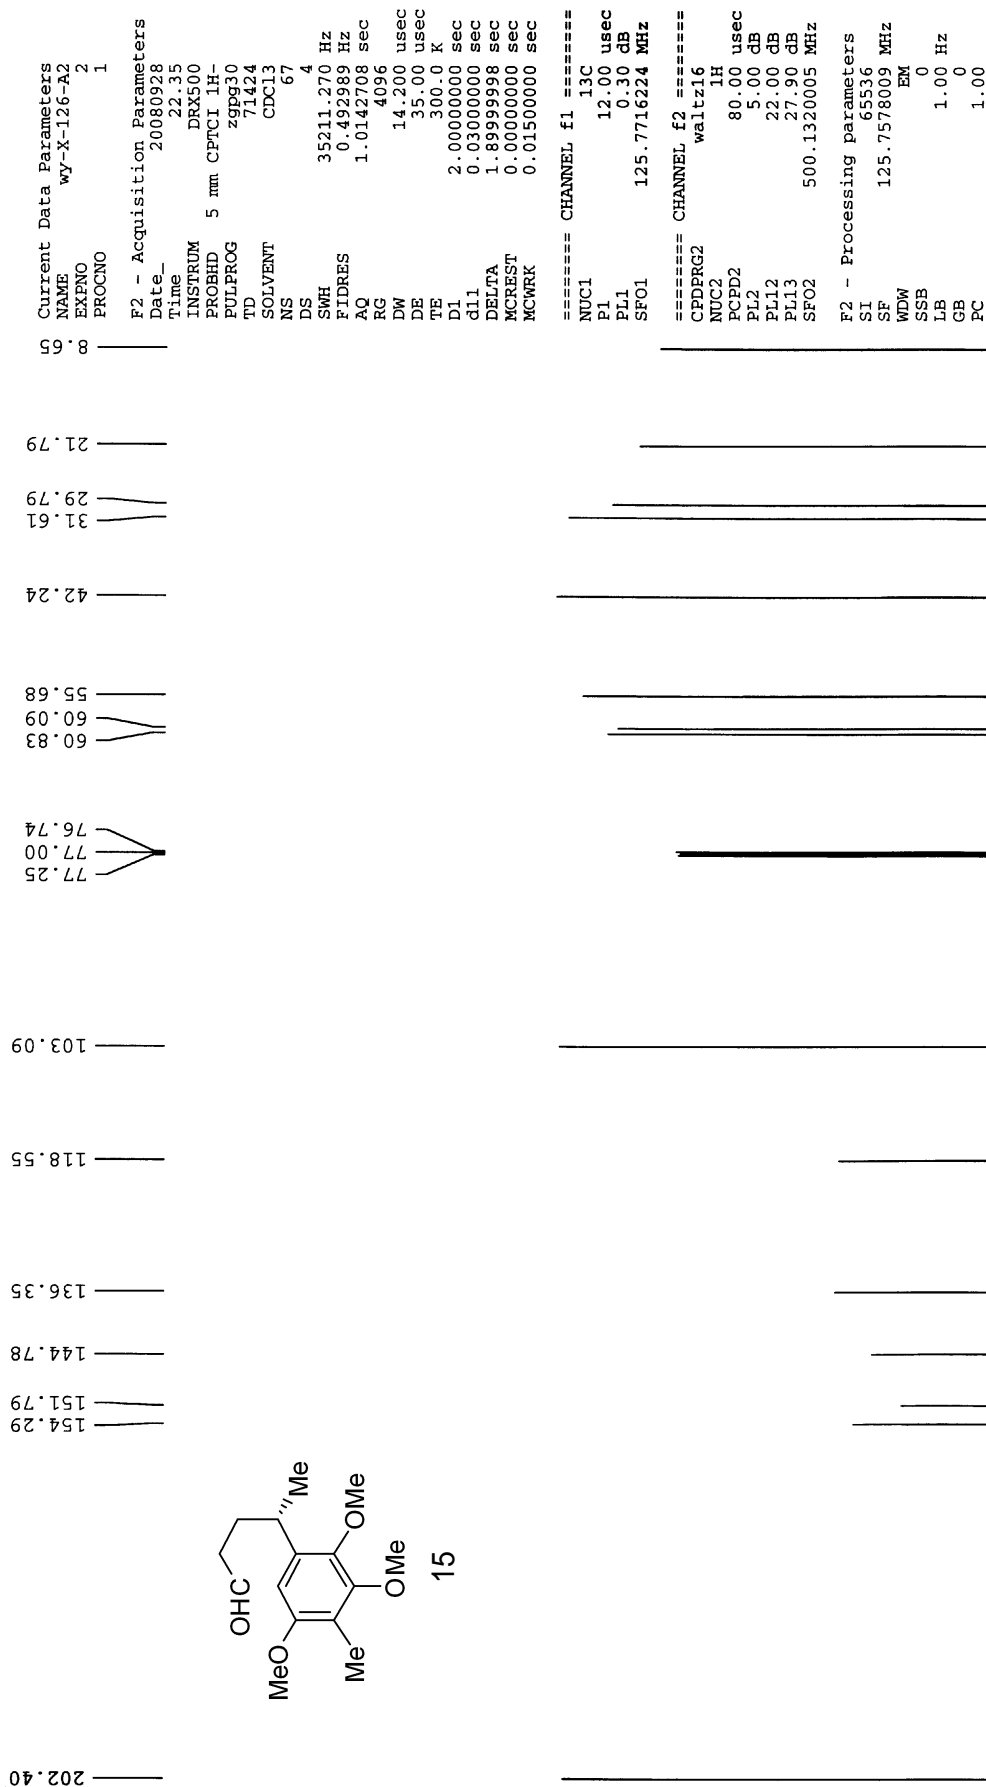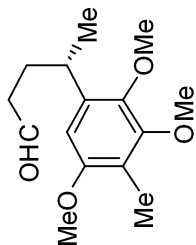

15

# <sup>1</sup>H NMR

6.768  
6.764  
6.419

4.212  
4.189  
4.165  
4.141  
3.816  
3.806  
3.795  
3.784  
3.767  
3.206  
3.182  
2.149  
2.117  
2.091  
1.771  
1.768  
1.751  
1.745  
1.722  
1.696  
1.310  
1.286  
1.262  
1.249  
1.226

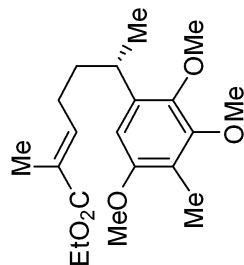

Current Data Parameters  
 NAME wy-XI-15-A  
 EXPNO 1  
 PROCNO 1

F2 - Acquisition Parameters  
 Date\_ 20081031  
 Time 20.00  
 INSTRUM DRX300  
 PROBD 5 mm Multinucl  
 PULPROG zg30pad  
 TD 32768  
 SOLVENT CDCl3  
 NS 16  
 DS 2  
 SWH 6172.839 Hz  
 FIDRES 0.188380 Hz  
 AQ 2.6542580 sec  
 RG 40.3  
 DW 81.000 usec  
 DE 6.00 usec  
 TE 300.0 K  
 D1 1.00000000 sec  
 D31 0.00000000 sec

===== CHANNEL f1 =====  
 NUC1 <sup>1</sup>H  
 P1 7.05 usec  
 PL1 0.00 dB  
 SFO1 300.1318534 MHz

F2 - Processing parameters  
 SI 32768  
 SF 300.1300022 MHz  
 WDW EM  
 SSB 0  
 LB 0.30 Hz  
 GB 0  
 PC 1.30

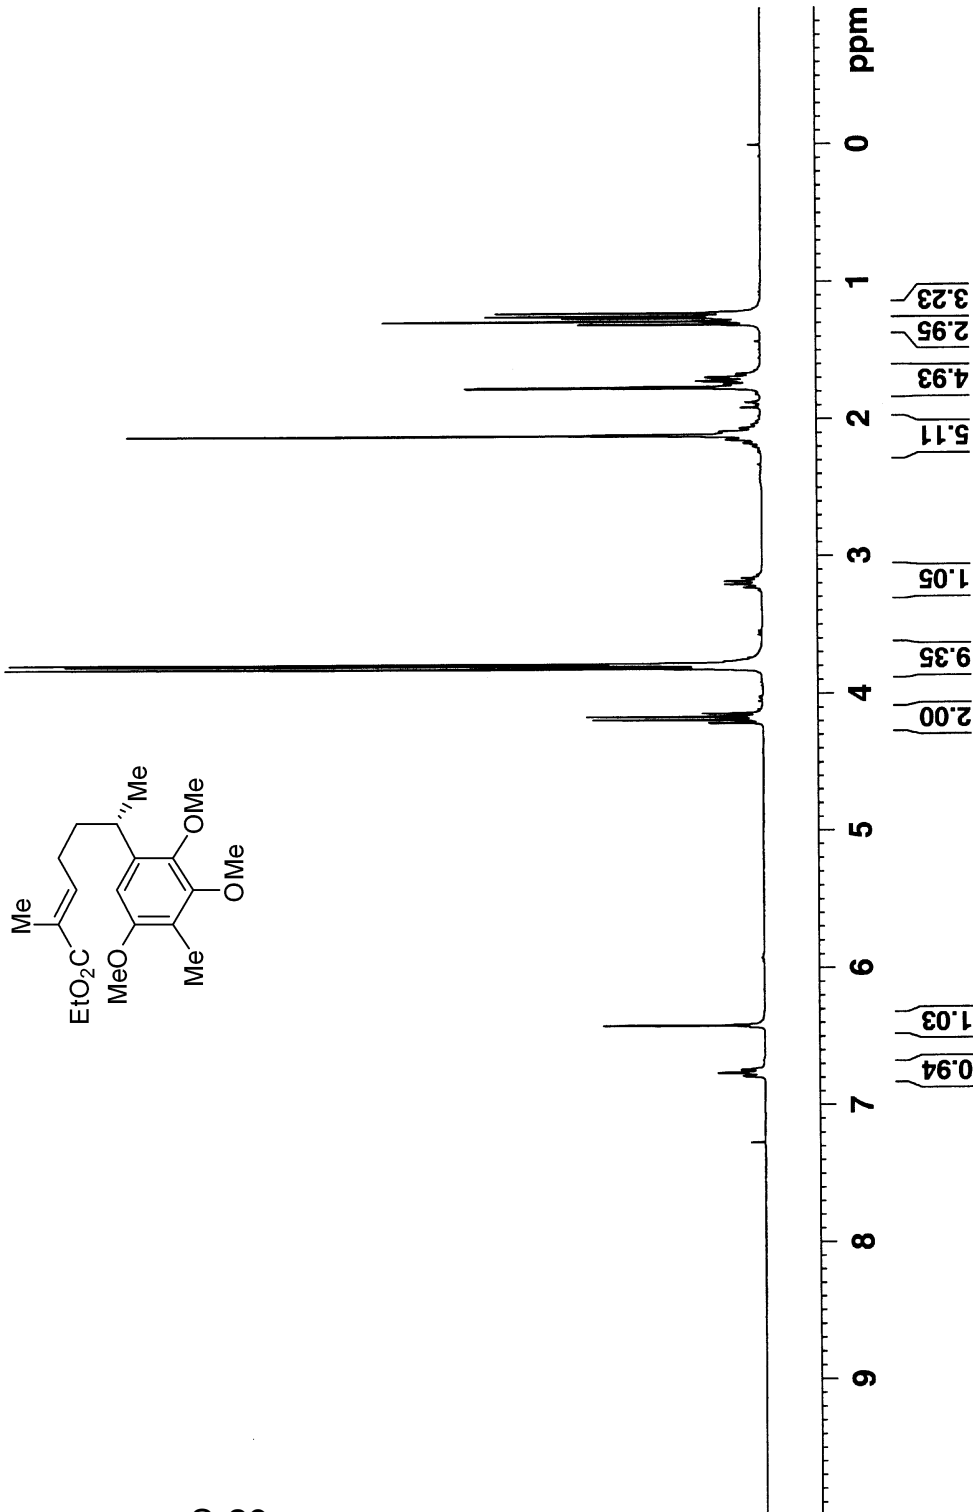

<sup>13</sup>C NMR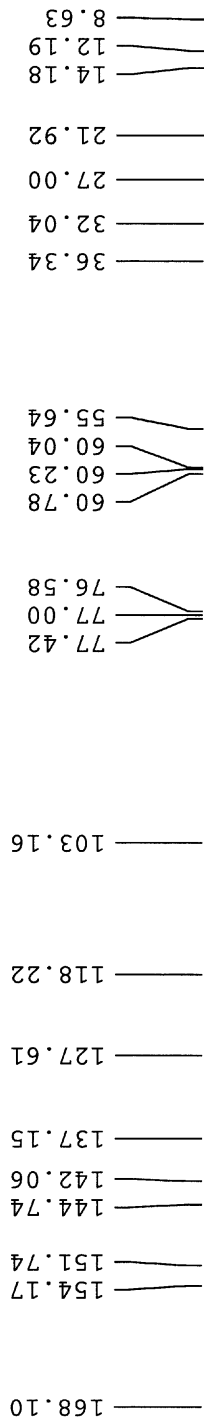

Current Data Parameters  
 NAME wy-XI-15-A  
 EXPNO 2  
 PROCNO 1

F2 - Acquisition Parameters  
 Date\_ 20081031  
 Time 20.08  
 INSTRUM DRX300  
 PROBHD 5 mm Multinucl  
 PULPROG zgpg30pad  
 TD 65536  
 SOLVENT CDCl3  
 NS 95  
 DS 4  
 SWH 18832.393 Hz  
 FIDRES 0.287360 Hz  
 AQ 1.7400308 sec  
 RG 22528  
 DW 26.550 usec  
 DE 6.00 usec  
 TE 300.0 K  
 D1 2.00000000 sec  
 D11 0.03000000 sec  
 D31 0.00000000 sec

===== CHANNEL f1 =====  
 NUC1 13C  
 P1 9.00 usec  
 PL1 5.00 dB  
 SFO1 75.4760107 MHz

===== CHANNEL f2 =====  
 CPDPRG2 waltz16  
 NUC2 1H  
 PCPD2 100.00 usec  
 PL2 120.00 dB  
 PL12 21.41 dB  
 SFO2 300.1312005 MHz

F2 - Processing parameters  
 SI 32768  
 SF 75.4677560 MHz  
 EM 0  
 SSB 0  
 LB 1.00 Hz  
 GB 0  
 PC 1.40

170 160 150 140 130 120 110 100 90 80 70 60 50 40 30 20 10 ppm

1H NMR

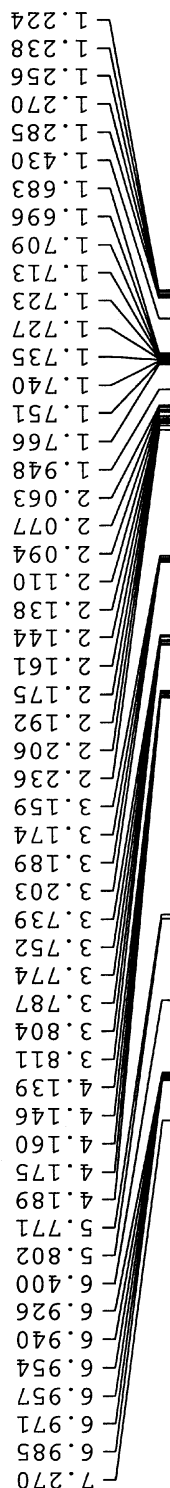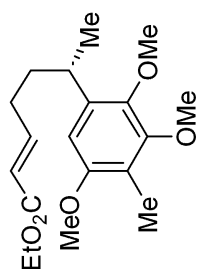

Current Data Parameters  
NAME wy-XI-18-A  
EXPNO 1  
PROCNO 1

F2 - Acquisition Parameters  
Date\_ 20081106  
Time 12.06  
INSTRUM DRX500  
PROBHD 5 mm CPTCI 1H-  
PULPROG zg30  
TD 65536  
SOLVENT CDCl<sub>3</sub>  
NS 8  
DS 2  
SWH 10330.578 Hz  
FIDRES 0.157632 Hz  
AQ 3.1719923 sec  
RG 5  
DW 48.400 usec  
DE 6.00 usec  
TE 300.0 K  
D1 1.00000000 sec  
MCREST 0.00000000 sec  
MCWRK 0.01500000 sec

===== CHANNEL f1 =====  
NUC1 1H  
P1 8.00 usec  
PL1 4.30 dB  
SF01 500.1335009 MHz

F2 - Processing parameters  
SI 32768  
SF 500.1300087 MHz  
WDW EM  
SSB 0  
LB 0.30 Hz  
GB 0  
PC 1.00

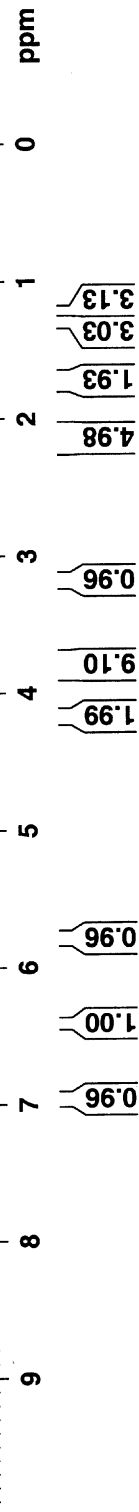

# 13C NMR

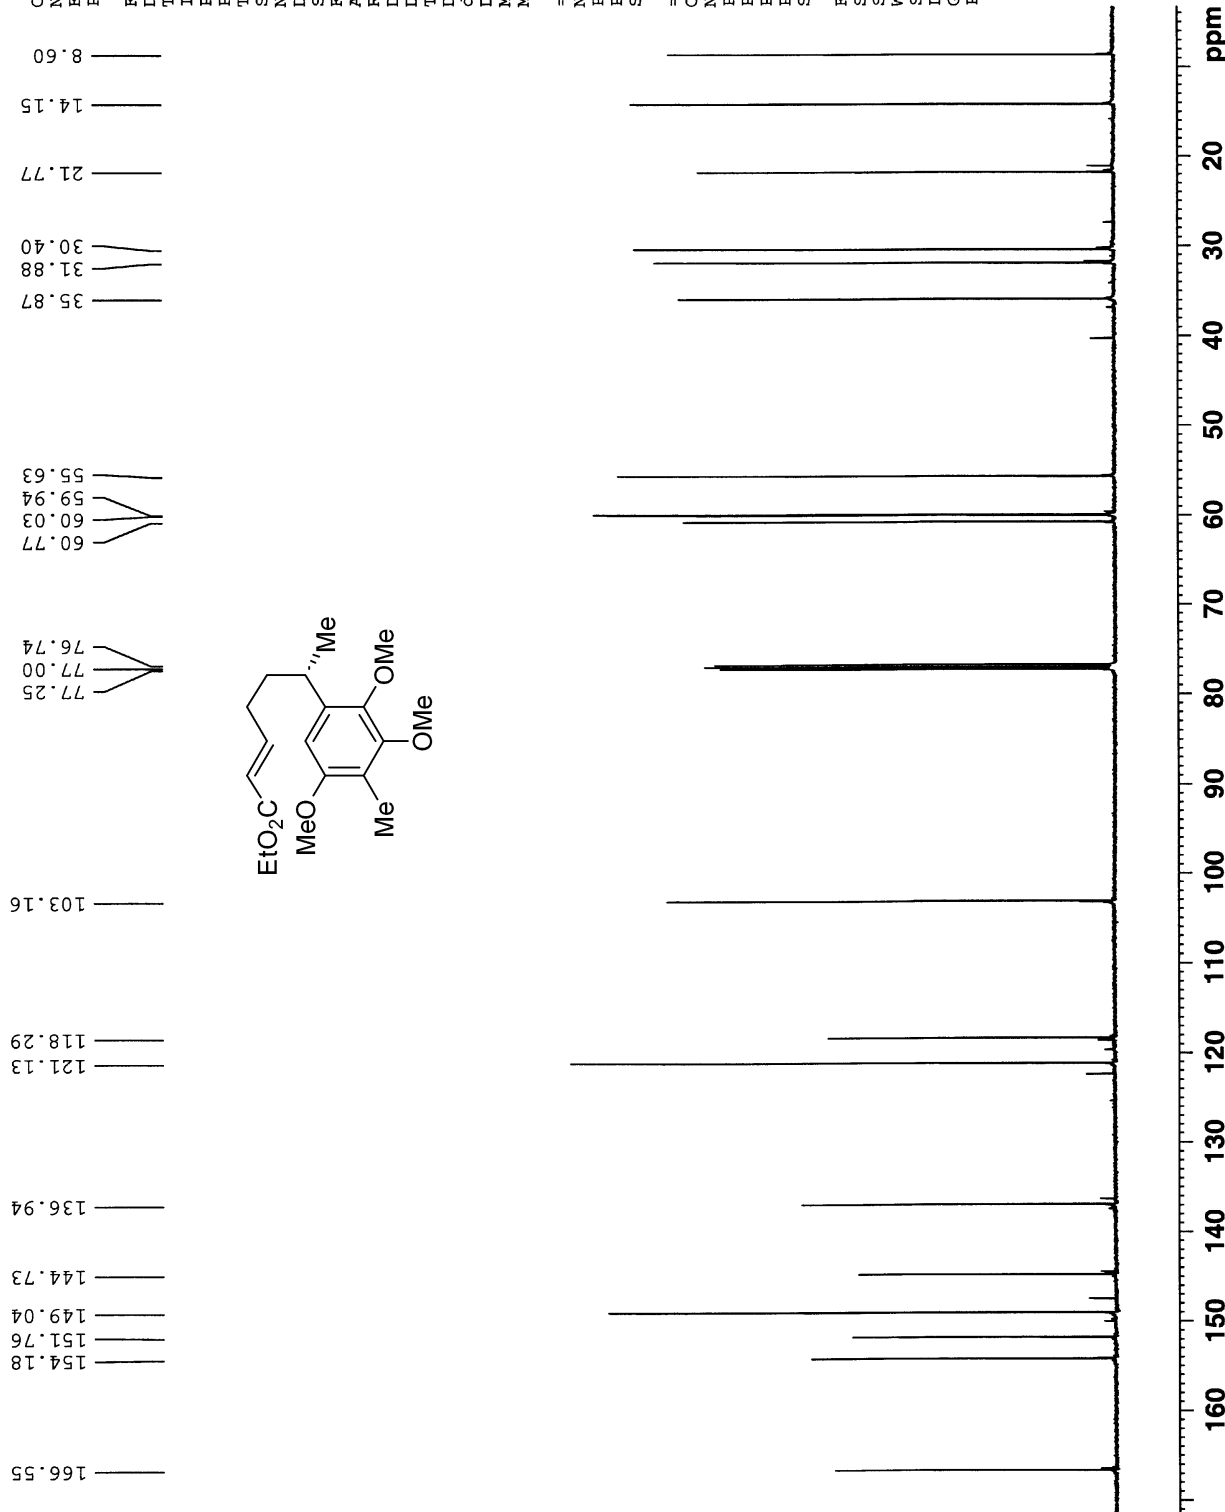

Current Data Parameters  
 NAME wy-XI-18-A  
 EXPNO 2  
 PROCNO 1  
 F2 - Acquisition Parameters  
 Date\_ 20081106  
 Time 12.10  
 INSTRUM DRX500  
 PROBHD 5 mm CPTCI 1H-  
 PULPROG zgpg30  
 TD 71424  
 SOLVENT CDCl3  
 NS 62  
 DS 4  
 SWH 35211.270 Hz  
 FIDRES 0.492989 Hz  
 AQ 1.0142708 sec  
 RG 4096  
 DW 14.200 usec  
 DE 35.00 usec  
 TE 300.0 K  
 D1 2.00000000 sec  
 d11 0.03000000 sec  
 DELTA 1.89999998 sec  
 MCREST 0.00000000 sec  
 MCWRK 0.01500000 sec  
 ===== CHANNEL f1 =====  
 NUC1 13C  
 P1 12.00 usec  
 PL1 0.30 dB  
 SFO1 125.7716224 MHz  
 ===== CHANNEL f2 =====  
 CPDPRG2 waltz16  
 NUC2 1H  
 P2 80.00 usec  
 PL2 5.00 dB  
 PL12 22.00 dB  
 PL13 27.90 dB  
 SFO2 500.1320005 MHz  
 F2 - Processing parameters  
 SI 65536  
 SF 125.7578030 MHz  
 WDW EM  
 SSB 0  
 LB 1.00 Hz  
 GB 0  
 PC 1.40

<sup>1</sup>H NMR

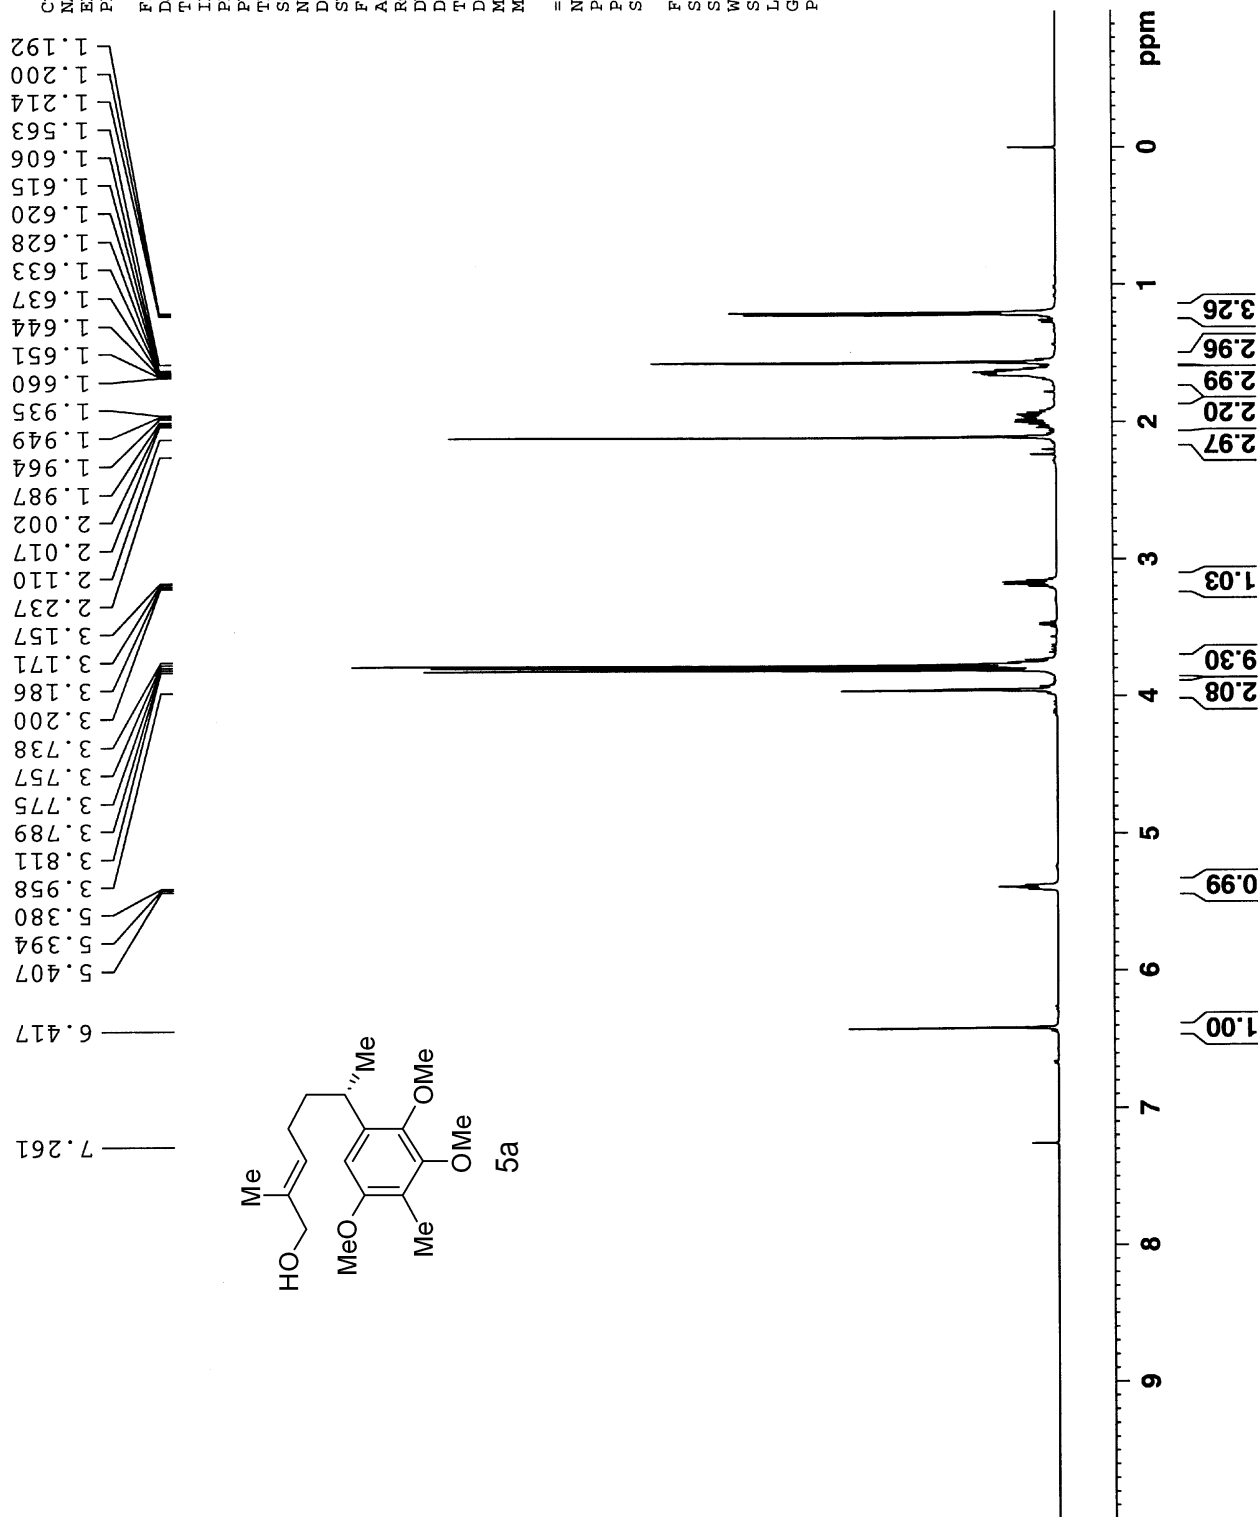

Current Data Parameters  
 NAME wy-XI-20-A  
 EXNO 1  
 PROCNO 1

F2 - Acquisition Parameters  
 Date\_ 20081106  
 Time 21.31  
 INSTRUM DRX500  
 PROHD 5 mm CPTCI 1H-  
 PULPROG zg30  
 TD 65536  
 SOLVENT CDCl3  
 NS 8  
 DS 2  
 SWH 10330.578 Hz  
 FIDRES 0.157632 Hz  
 AQ 3.1719923 sec  
 RG 8  
 DW 48.400 usec  
 DE 6.00 usec  
 TE 300.0 K  
 D1 1.00000000 sec  
 MCREST 0.00000000 sec  
 MCWRK 0.01500000 sec

===== CHANNEL f1 =====  
 NUC1 1H  
 P1 8.00 usec  
 PL1 4.30 dB  
 SFO1 500.1335009 MHz

F2 - Processing parameters  
 SI 32768  
 SF 500.1300135 MHz  
 WDW EM  
 SSB 0  
 LB 0.30 Hz  
 GB 0  
 PC 1.00

<sup>13</sup>C NMR

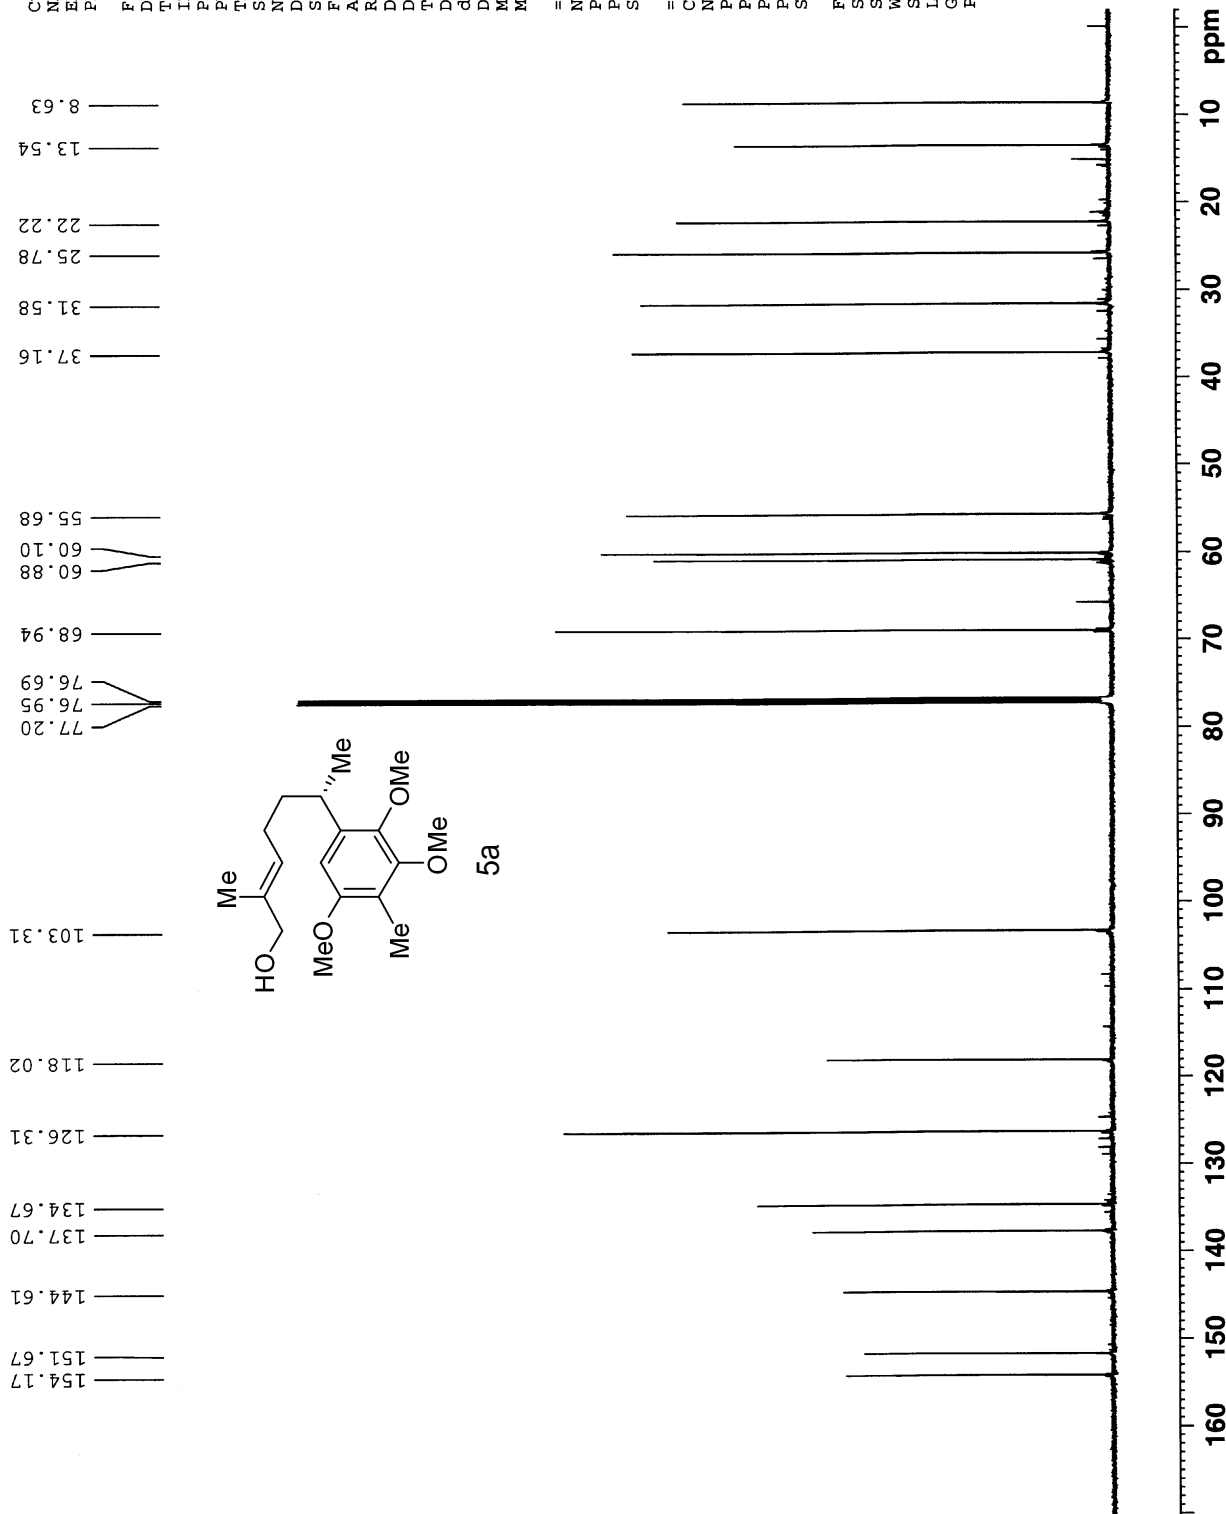

Current Data Parameters  
NAME wy-XI-20-A  
EXPNO 2  
PROCNO 1

F2 - Acquisition Parameters  
Date\_ 20081106  
Time 21.40  
INSTRUM 5 mm CPTCI 1H-  
PROBHD DRX500  
PULPROG zgpg30  
TD 71424  
SOLVENT CDCl<sub>3</sub>  
NS 148  
DS 4  
SWH 35211.270 Hz  
FIDRES 0.492989 Hz  
AQ 1.0142708 sec  
RG 4096  
DW 14.200 usec  
DE 35.00 usec  
TE 300.0 K  
D1 2.00000000 sec  
d11 0.03000000 sec  
DELTA 1.89999998 sec  
MCREST 0.00000000 sec  
MCWERK 0.01500000 sec

===== CHANNEL f1 =====  
NUC1 <sup>13</sup>C  
P1 12.00 usec  
PL1 0.30 dB  
SFO1 125.7716224 MHz

===== CHANNEL f2 =====  
CPDPRG2 waltz16  
NUC2 <sup>1</sup>H  
PCPD2 80.00 usec  
PL2 5.00 dB  
PL12 22.00 dB  
PL13 27.90 dB  
SFO2 500.1320005 MHz

F2 - Processing parameters  
SI 65536  
SF 125.7578041 MHz  
WDW EM  
SSB 0  
LB 1.00 Hz  
GB 0  
PC 1.40

<sup>1</sup>H NMR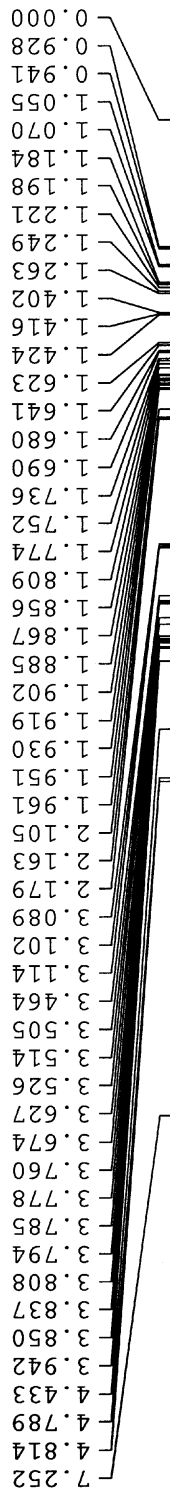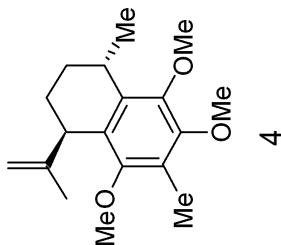

| Current Data Parameters     |                 |
|-----------------------------|-----------------|
| NAME                        | wy-XI-80-A      |
| EXPNO                       | 1               |
| PROCNO                      | 1               |
| F2 - Acquisition Parameters |                 |
| Date_                       | 20090119        |
| Time                        | 12.46           |
| INSTRUM                     | DRX500          |
| PROBHD                      | 5 mm CPTCI 1H-  |
| PULPROG                     | zg30            |
| TD                          | 65536           |
| SOLVENT                     | CDCl3           |
| NS                          | 8               |
| DS                          | 2               |
| SWH                         | 10330.578 Hz    |
| FIDRES                      | 0.157632 Hz     |
| AQ                          | 3.1719923 sec   |
| RG                          | 5               |
| DW                          | 48.400 usec     |
| DE                          | 6.00 usec       |
| TE                          | 300.0 K         |
| DI                          | 1.00000000 sec  |
| MCREST                      | 0.00000000 sec  |
| MCWRK                       | 0.01500000 sec  |
| ===== CHANNEL f1 =====      |                 |
| NUCL                        | 1H              |
| PL1                         | 8.00 usec       |
| PL1                         | 4.30 dB         |
| SFO1                        | 500.1335009 MHz |
| F2 - Processing parameters  |                 |
| SI                          | 32768           |
| SF                          | 500.1300182 MHz |
| WDW                         | EM              |
| SSB                         | 0               |
| LB                          | 0.30 Hz         |
| GB                          | 0               |
| PC                          | 1.00            |

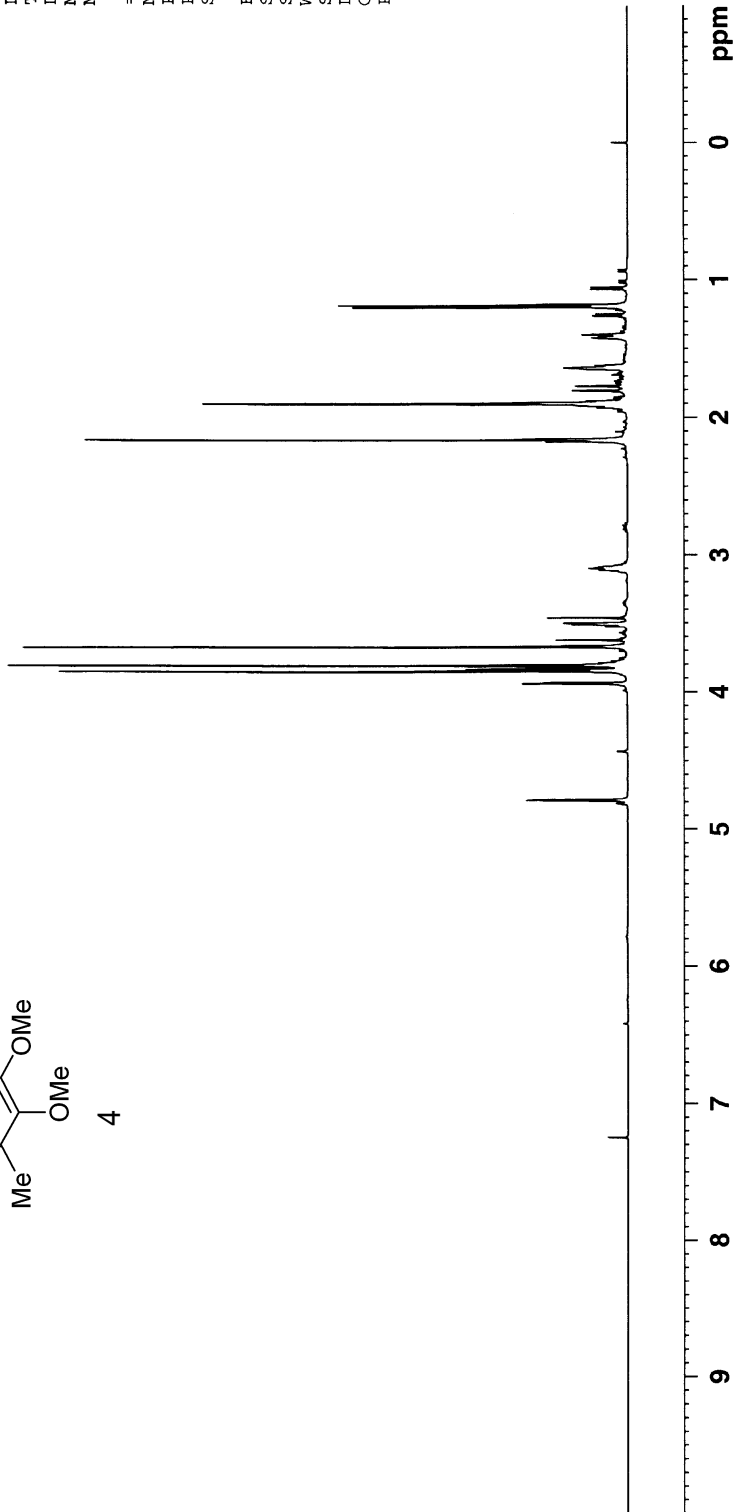

# 13C NMR

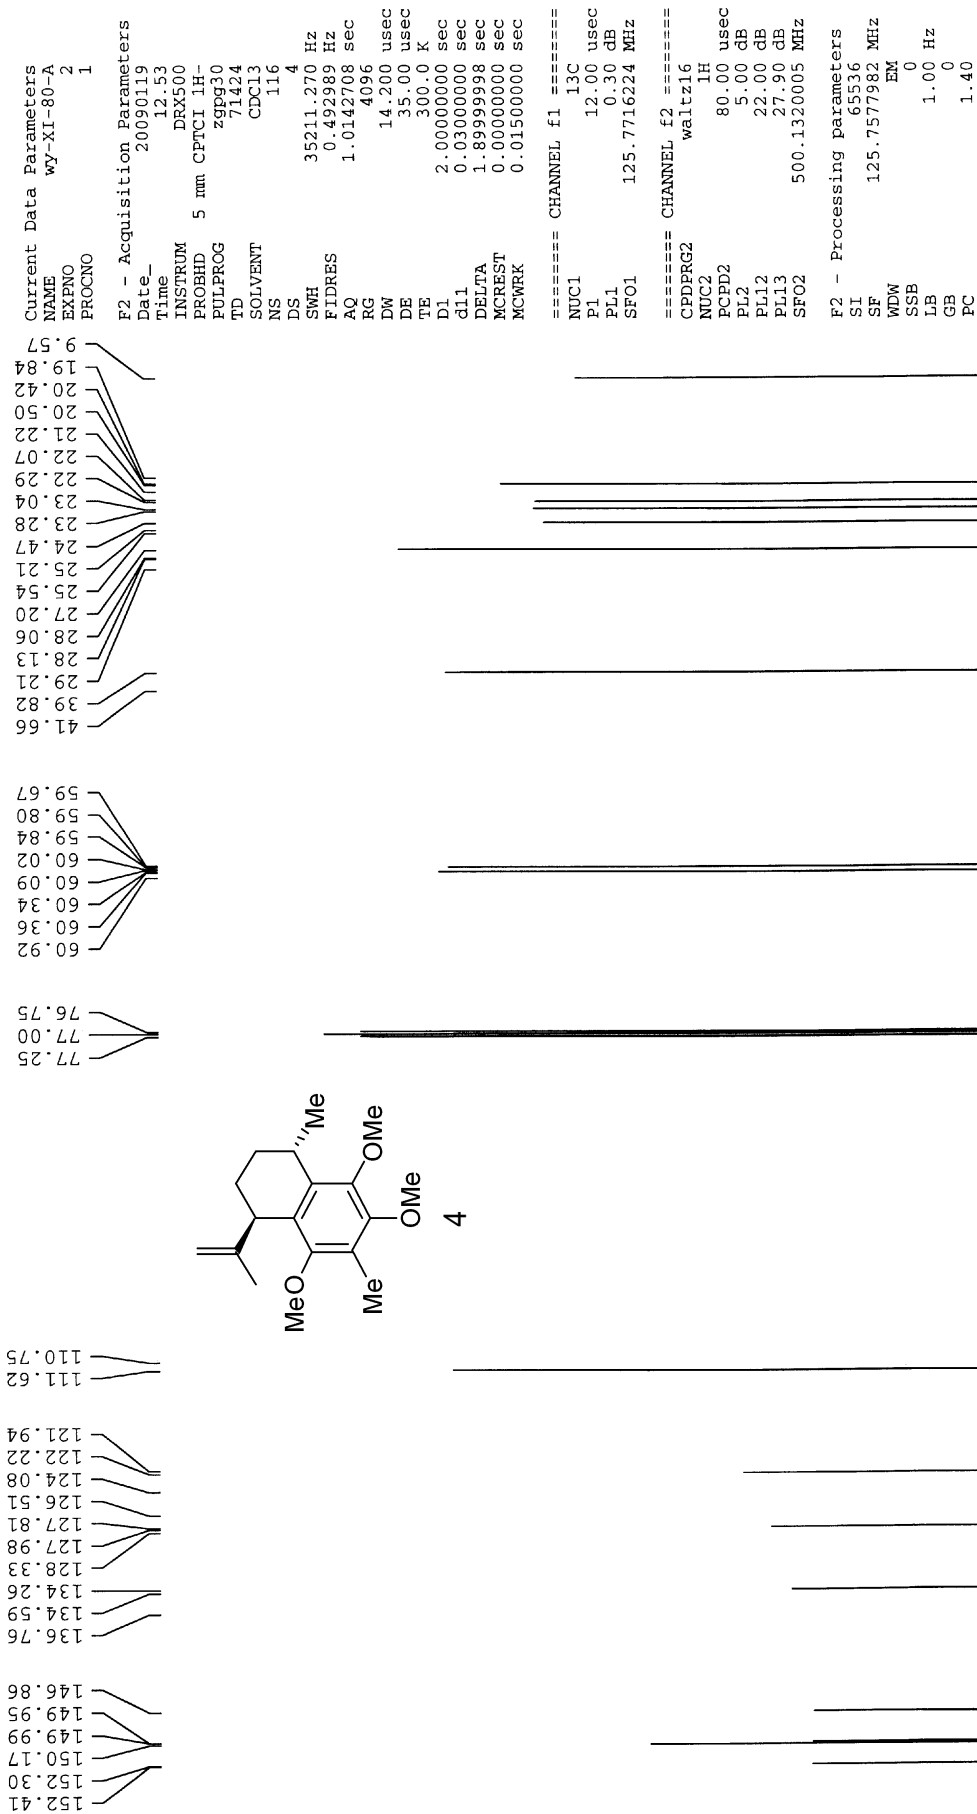

1H NMR

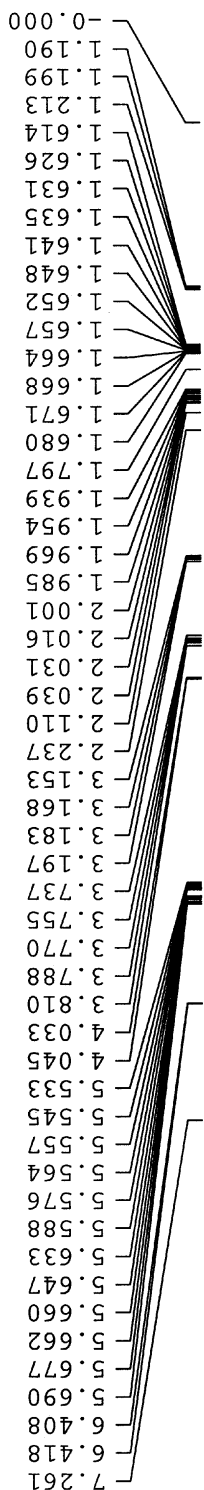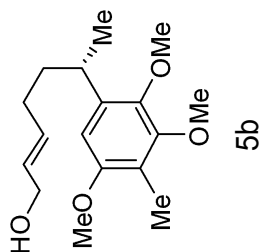

Current Data Parameters  
 NAME wy-XI-21-A  
 EXPNO 1  
 PROCNO 1

F2 - Acquisition Parameters  
 Date\_ 20081106  
 Time 21.25  
 INSTRUM DRX500  
 PROBHD 5 mm CPTCI 1H-  
 PULPROG zg30  
 TD 65536  
 SOLVENT CDCl3  
 NS 8  
 DS 2  
 SWH 10330.578 Hz  
 FIDRES 0.157632 Hz  
 AQ 3.1719923 sec  
 RG 5  
 DW 48.400 usec  
 DE 6.00 usec  
 TE 300.0 K  
 D1 1.00000000 sec  
 MCREST 0.00000000 sec  
 MCWRK 0.01500000 sec

===== CHANNEL f1 =====  
 NUC1 1H  
 P1 8.00 usec  
 PL1 4.30 dB  
 SF01 500.1335009 MHz

F2 - Processing parameters  
 SI 32768  
 SF 500.1300131 MHz  
 EM  
 WDW 0  
 SSB 0  
 LB 0.30 Hz  
 GB 0  
 PC 1.40

13C NMR

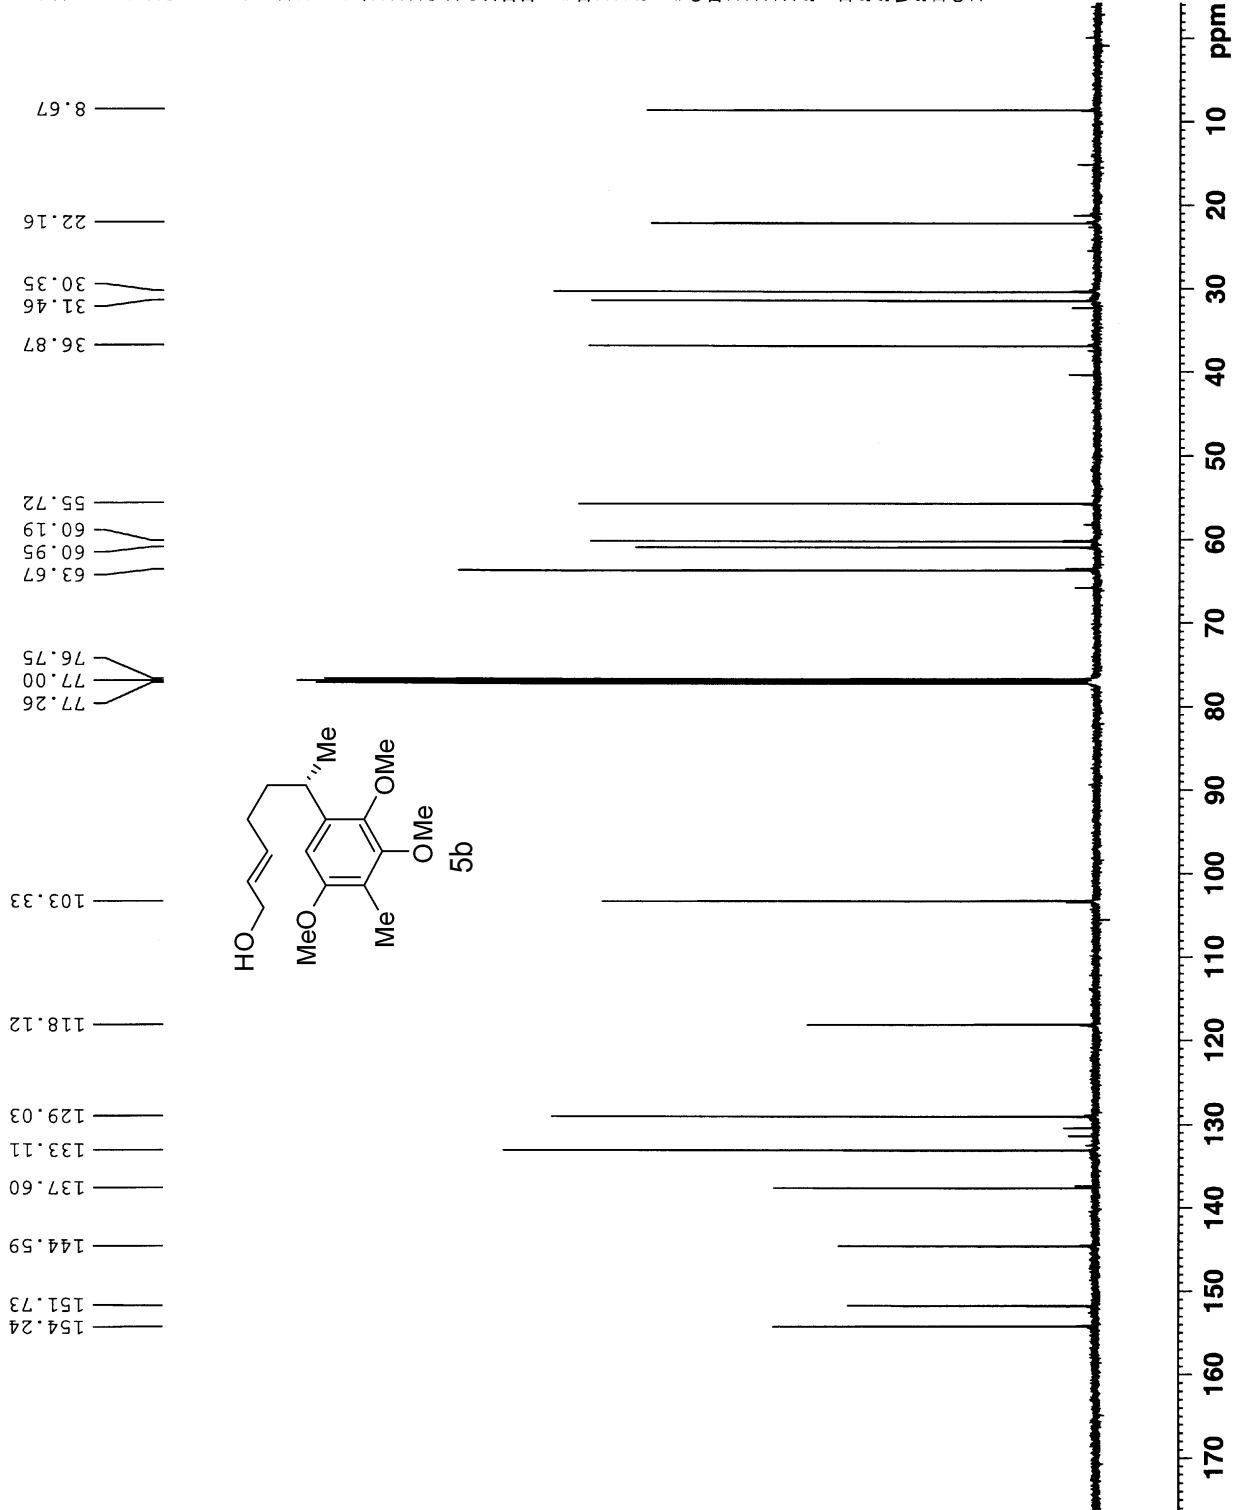

1H NMR

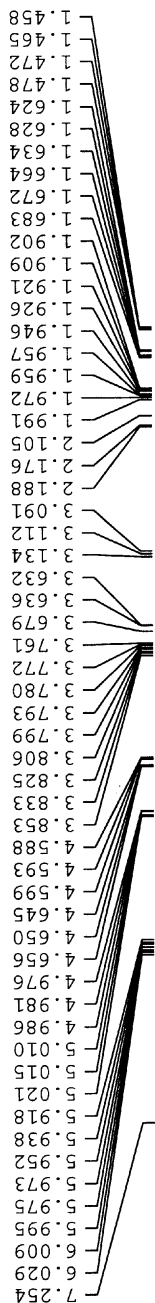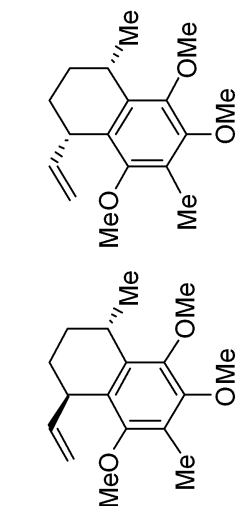

12.5:1

16

Current Data Parameters  
 NAME wy-XI-64-A  
 EXPNO 1  
 PROCNO 1  
 F2 - Acquisition Parameters  
 Date\_ 20090110  
 Time 9.39  
 INSTRUM DRX300  
 PROBHD 5 mm Multinucl  
 PULPROG zg30pad  
 TD 32768  
 SOLVENT CDCl3  
 NS 16  
 DS 2  
 SWH 6172.839 Hz  
 FIDRES 0.188380 Hz  
 AQ 2.6542580 sec  
 RG 101.6  
 DW 81.000 usec  
 DE 6.00 usec  
 TE 300.0 K  
 D1 1.00000000 sec  
 D31 0.00000000 sec  
 ===== CHANNEL f1 =====  
 NUC1 1H  
 P1 7.05 usec  
 PL1 0.00 dB  
 SFO1 300.1318534 MHz  
 F2 - Processing parameters  
 SI 32768  
 SF 300.1300081 MHz  
 WDW EM  
 SSB 0  
 LB 0.30 Hz  
 GB 0  
 PC 1.40

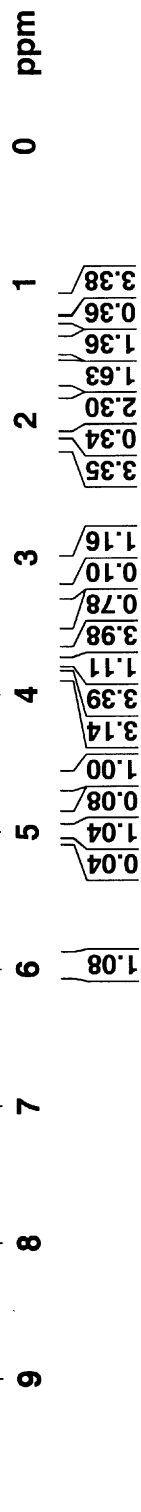

13C NMR

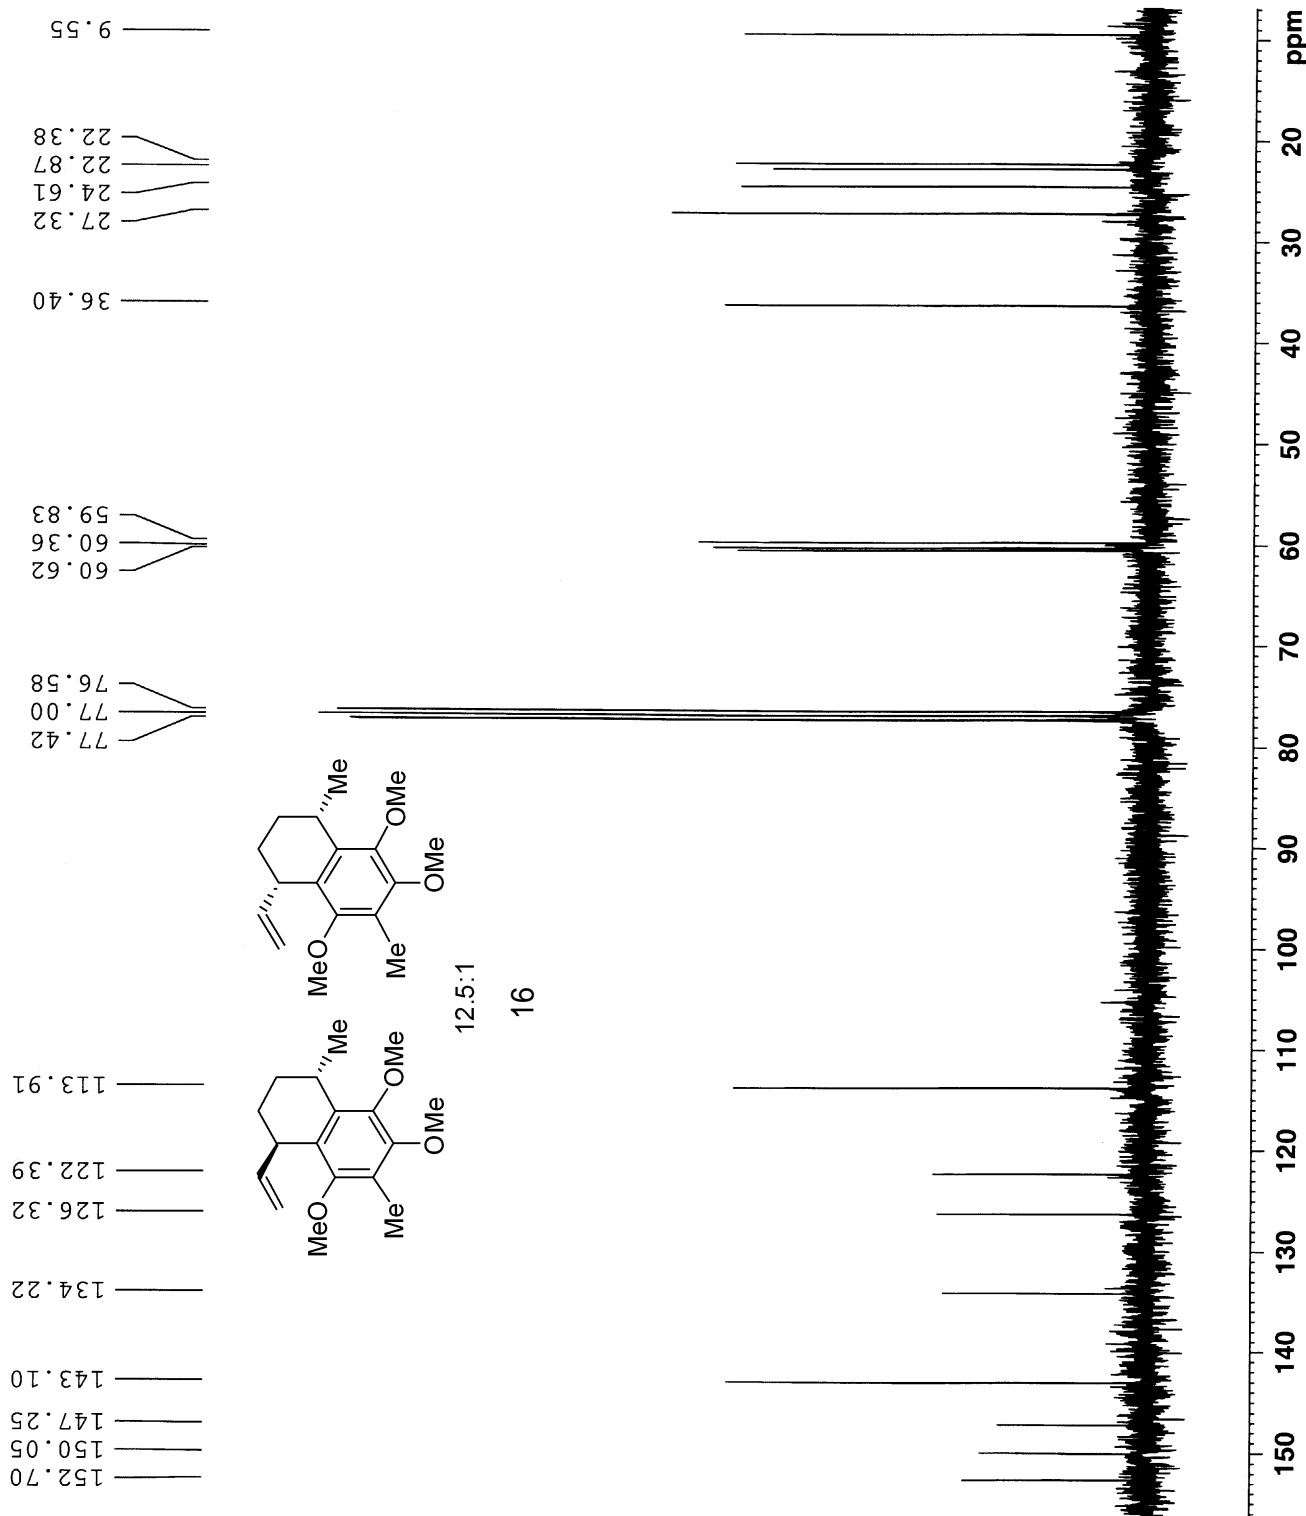

1H NMR

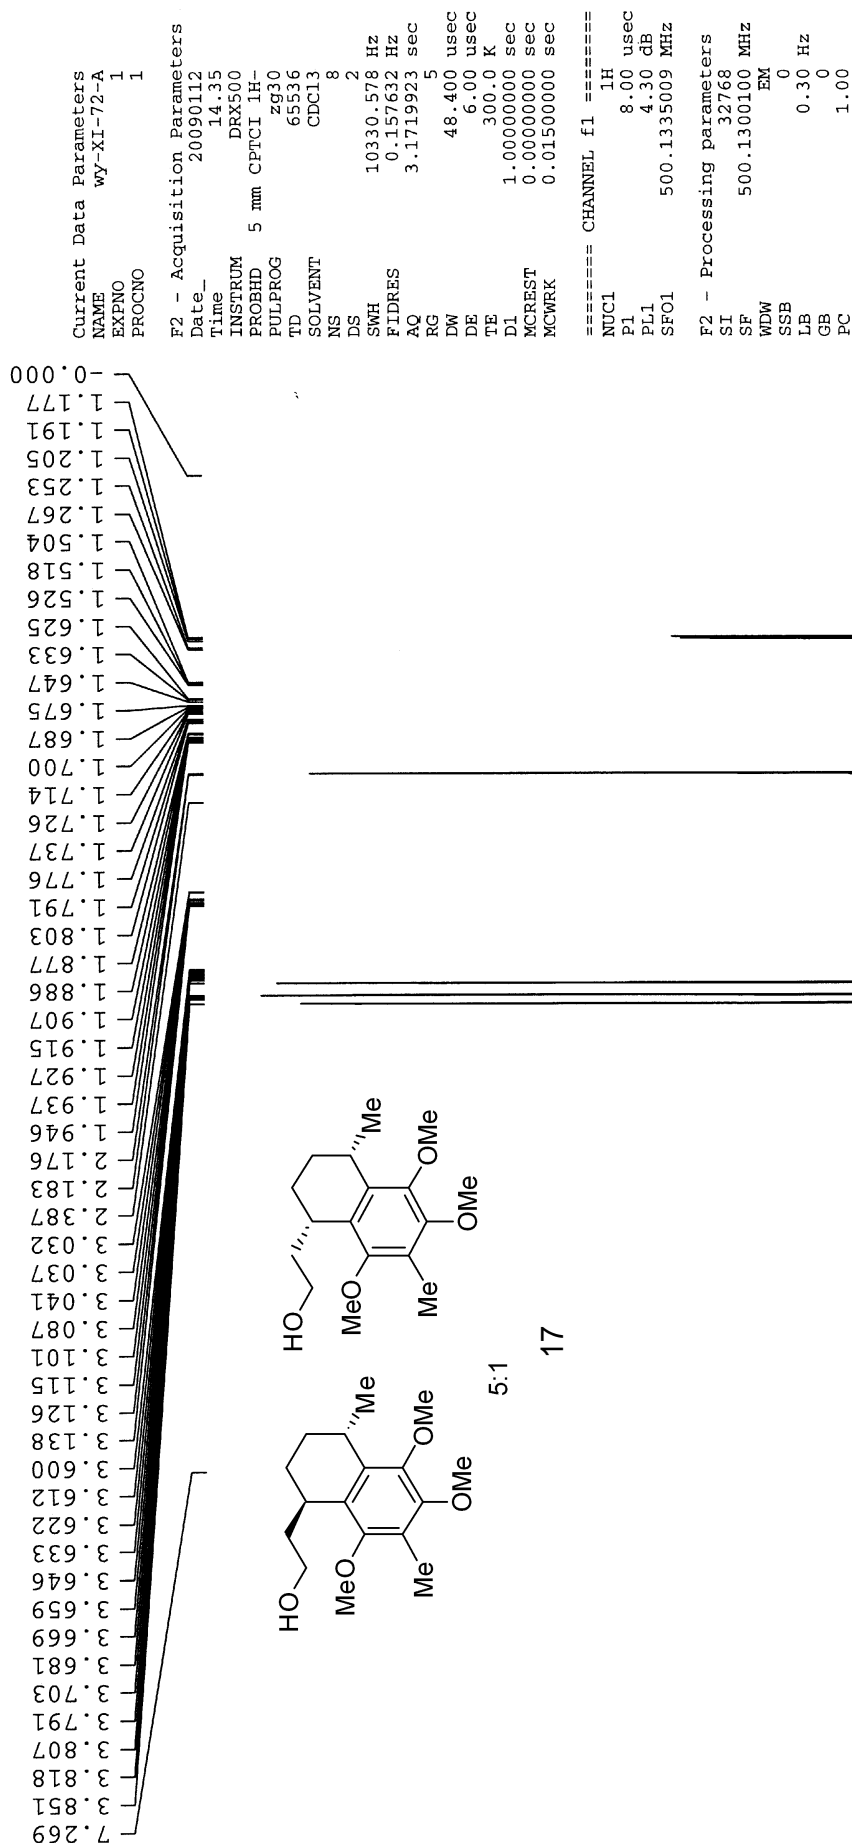

<sup>13</sup>C NMR

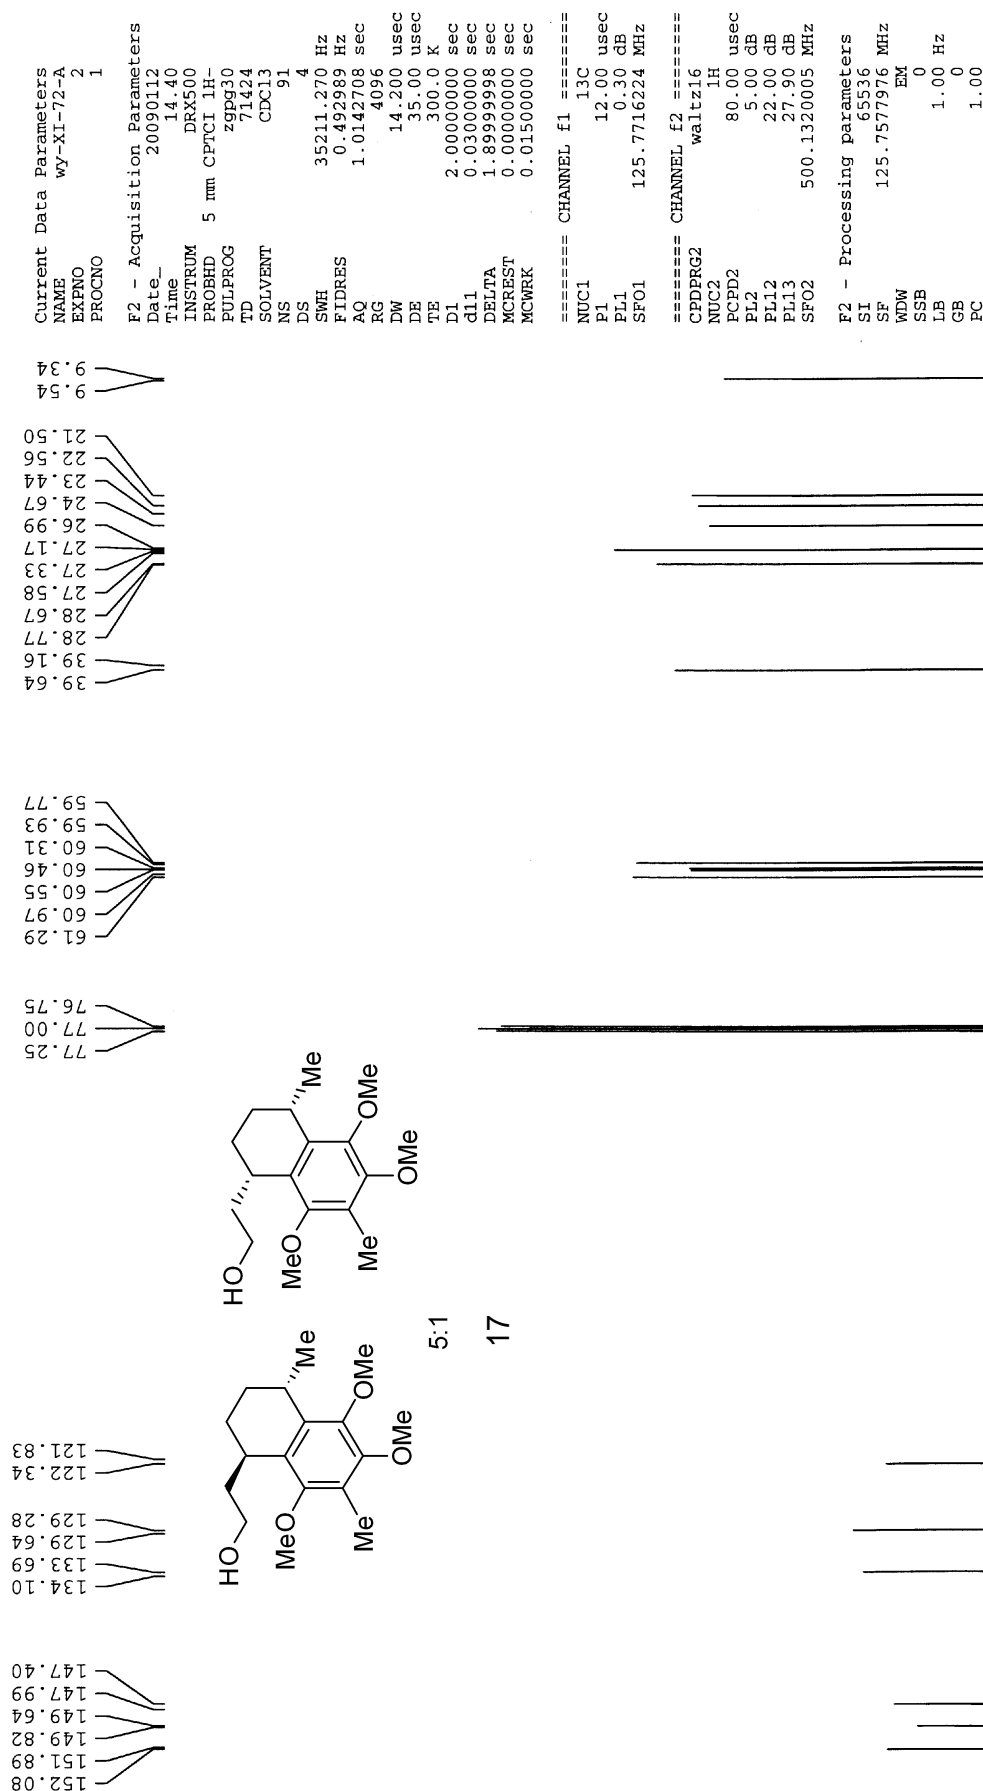

1H NMR

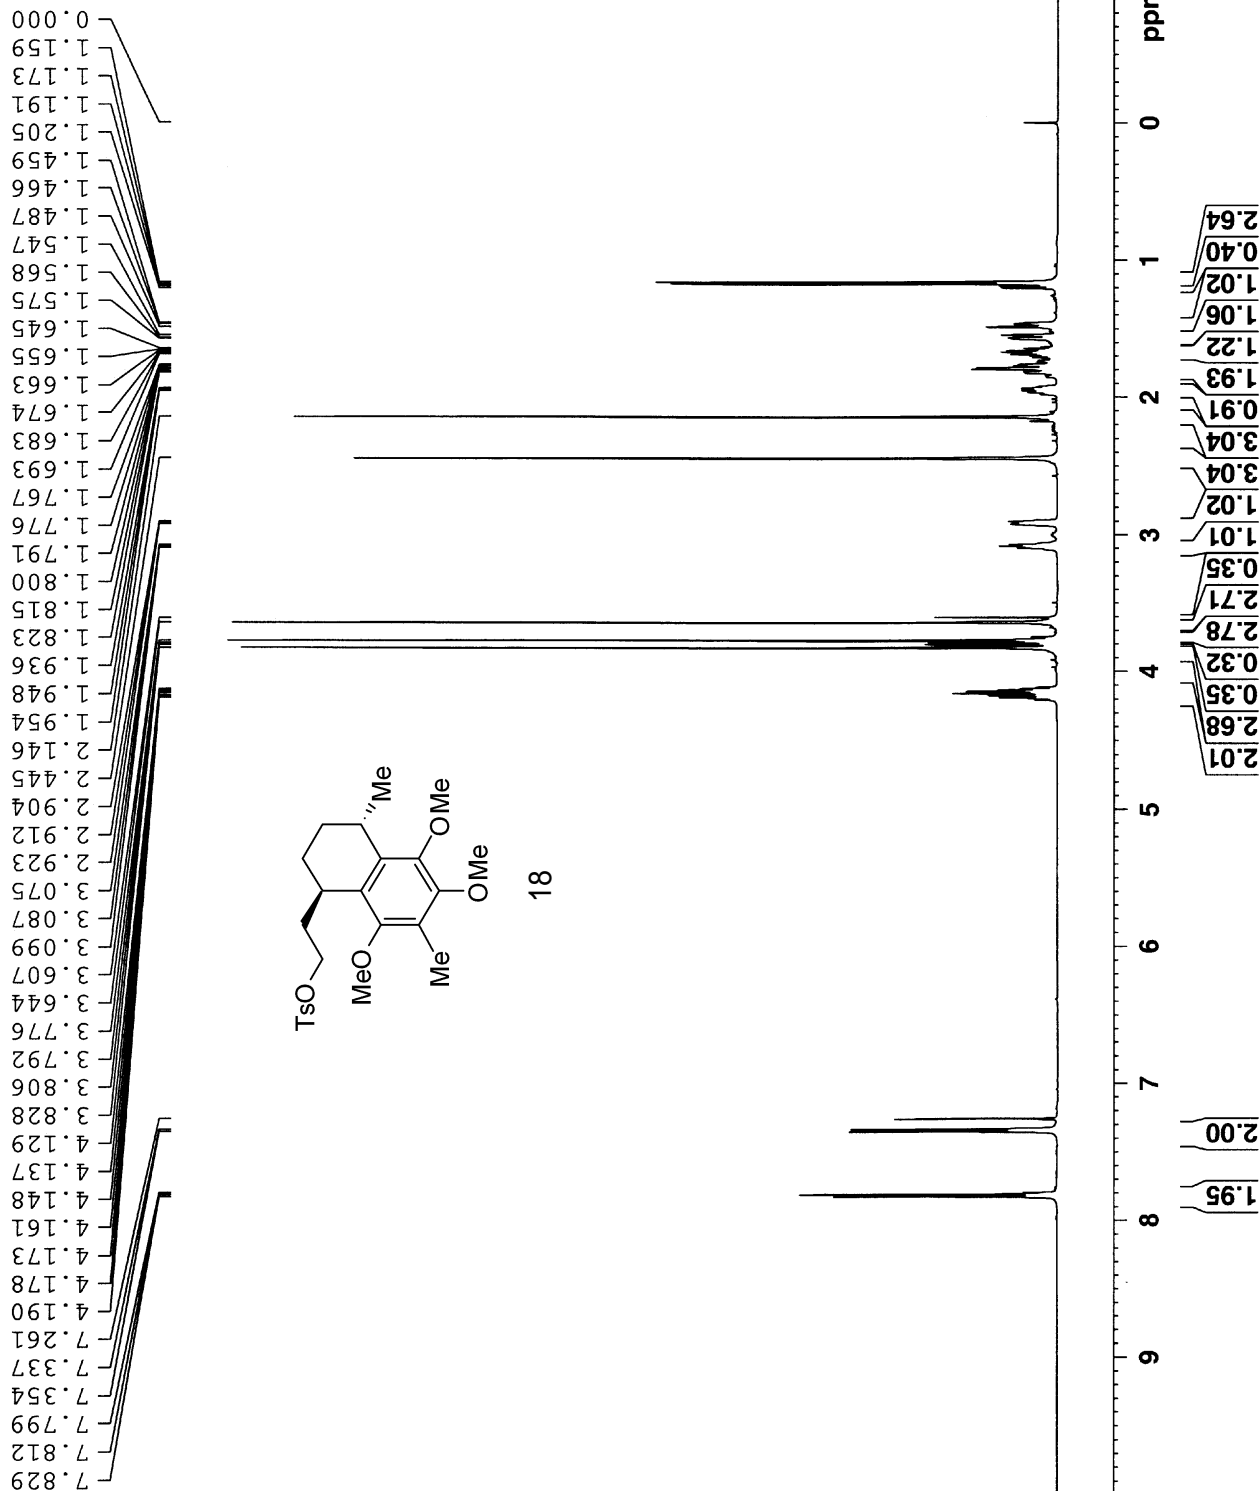

Current Data Parameters  
 NAME wy-XI-84-A  
 EXPNO 1  
 PROCNO 1

F2 - Acquisition Parameters  
 Date\_ 20090126  
 Time 15.52  
 INSTRUM DRX500  
 PROBD 5 mm CPTCI 1H-  
 PULPROG zg30  
 TD 65536  
 SOLVENT CDCl3  
 NS 8  
 DS 2  
 SWH 10330.578 Hz  
 FIDRES 0.157632 Hz  
 AQ 3.1719923 sec  
 RG 5  
 DW 48.400 usec  
 DE 6.00 usec  
 TE 300.0 K  
 D1 1.00000000 sec  
 MCREST 0.00000000 sec  
 MCWRK 0.01500000 sec

===== CHANNEL f1 =====  
 NUC1 1H  
 P1 8.00 usec  
 PL1 4.30 dB  
 SF01 500.1335009 MHz

F2 - Processing parameters  
 SI 32768  
 SF 500.1300138 MHz  
 EM  
 SSB 0  
 LB 0.30 Hz  
 GB 0  
 PC 1.00

13C NMR

Current Data Parameters  
 NAME wy-XI-84-A  
 EXPNO 2  
 PROCNO 1

F2 - Acquisition Parameters  
 Date\_ 20090126  
 Time 15.56  
 INSTRUM DRX500  
 PROBHD 5 mm CPTCI 1H-  
 PULPROG zgpg30  
 TD 71424  
 SOLVENT CDC13  
 NS 72  
 DS 4  
 SWH 35211.270 Hz  
 FIDRES 0.492989 Hz  
 AQ 1.0142708 sec  
 RG 4096  
 DW 14.200 usec  
 DE 35.00 usec  
 TE 300.0 K  
 D1 2.0000000 sec  
 d11 0.0300000 sec  
 DELTA 1.89999998 sec  
 MCREST 0.0000000 sec  
 MCWRK 0.01500000 sec

===== CHANNEL f1 =====  
 NUC1 13C  
 P1 12.00 usec  
 PL1 0.30 dB  
 SFO1 125.7716224 MHz

===== CHANNEL f2 =====  
 CPDPRG2 waltz16  
 NUC2 1H  
 PCPD2 80.00 usec  
 PL2 5.00 dB  
 PL12 22.00 dB  
 PL13 27.90 dB  
 SFO2 500.1320005 MHz

F2 - Processing parameters  
 SI 65536  
 SF 125.7578009 MHz  
 WDW EM  
 SSB 0  
 LB 1.00 Hz  
 GB 0  
 PC 1.00

9.31  
 9.42  
 20.31  
 21.55  
 22.14  
 22.30  
 24.50  
 25.00  
 27.05  
 27.61  
 27.74  
 28.99  
 29.38  
 34.35  
 35.34

59.73  
 59.75  
 59.98  
 60.02  
 60.25  
 69.57  
 69.79  
 76.75  
 77.00  
 77.20  
 77.25

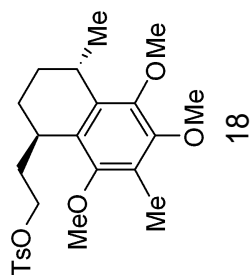

122.43  
 122.71  
 127.84  
 128.67  
 128.80  
 129.70  
 133.28  
 133.61  
 134.36  
 144.49  
 147.08  
 147.35  
 149.82  
 149.90  
 152.27

ppm

1H NMR

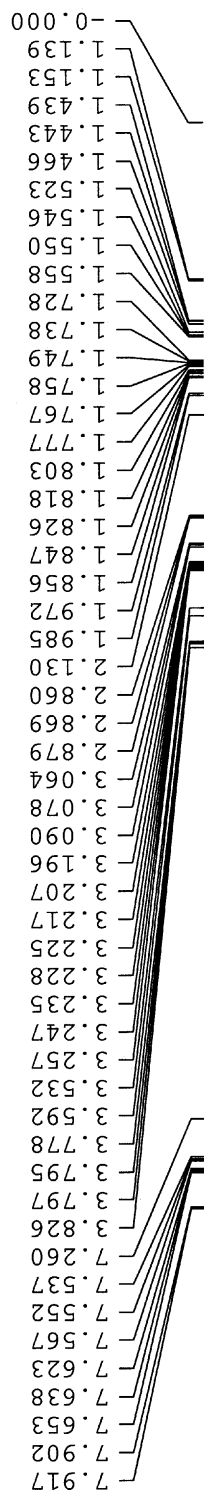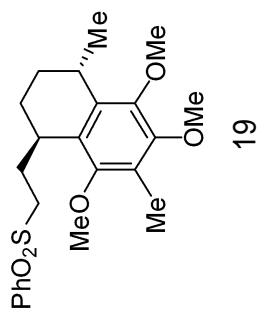

Current Data Parameters  
 NAME wy-XI-82-Crystl  
 EXPNO 1  
 PROCNO 1  
 F2 - Acquisition Parameters  
 Date\_ 20090128  
 Time 14.11  
 INSTRUM DRX500  
 PROBHD 5 mm CPTCI 1H-  
 PULPROG zg30  
 TD 65536  
 SOLVENT CDCl<sub>3</sub>  
 NS 8  
 DS 2  
 SWH 10330.578 Hz  
 FIDRES 0.157632 Hz  
 AQ 3.1719923 sec  
 RG 14.3  
 DW 48.400 usec  
 DE 6.00 usec  
 TE 300.0 K  
 D1 1.00000000 sec  
 MCREST 0.00000000 sec  
 MCWRK 0.01500000 sec  
 ===== CHANNEL f1 =====  
 NUC1 1H  
 P1 8.00 usec  
 PL1 4.30 dB  
 SF01 500.1335009 MHz  
 F2 - Processing parameters  
 SI 32768  
 SF 500.1300144 MHz  
 WDW EM  
 SSB 0  
 LB 0.30 Hz  
 GB 0  
 PC 1.40

13C NMR

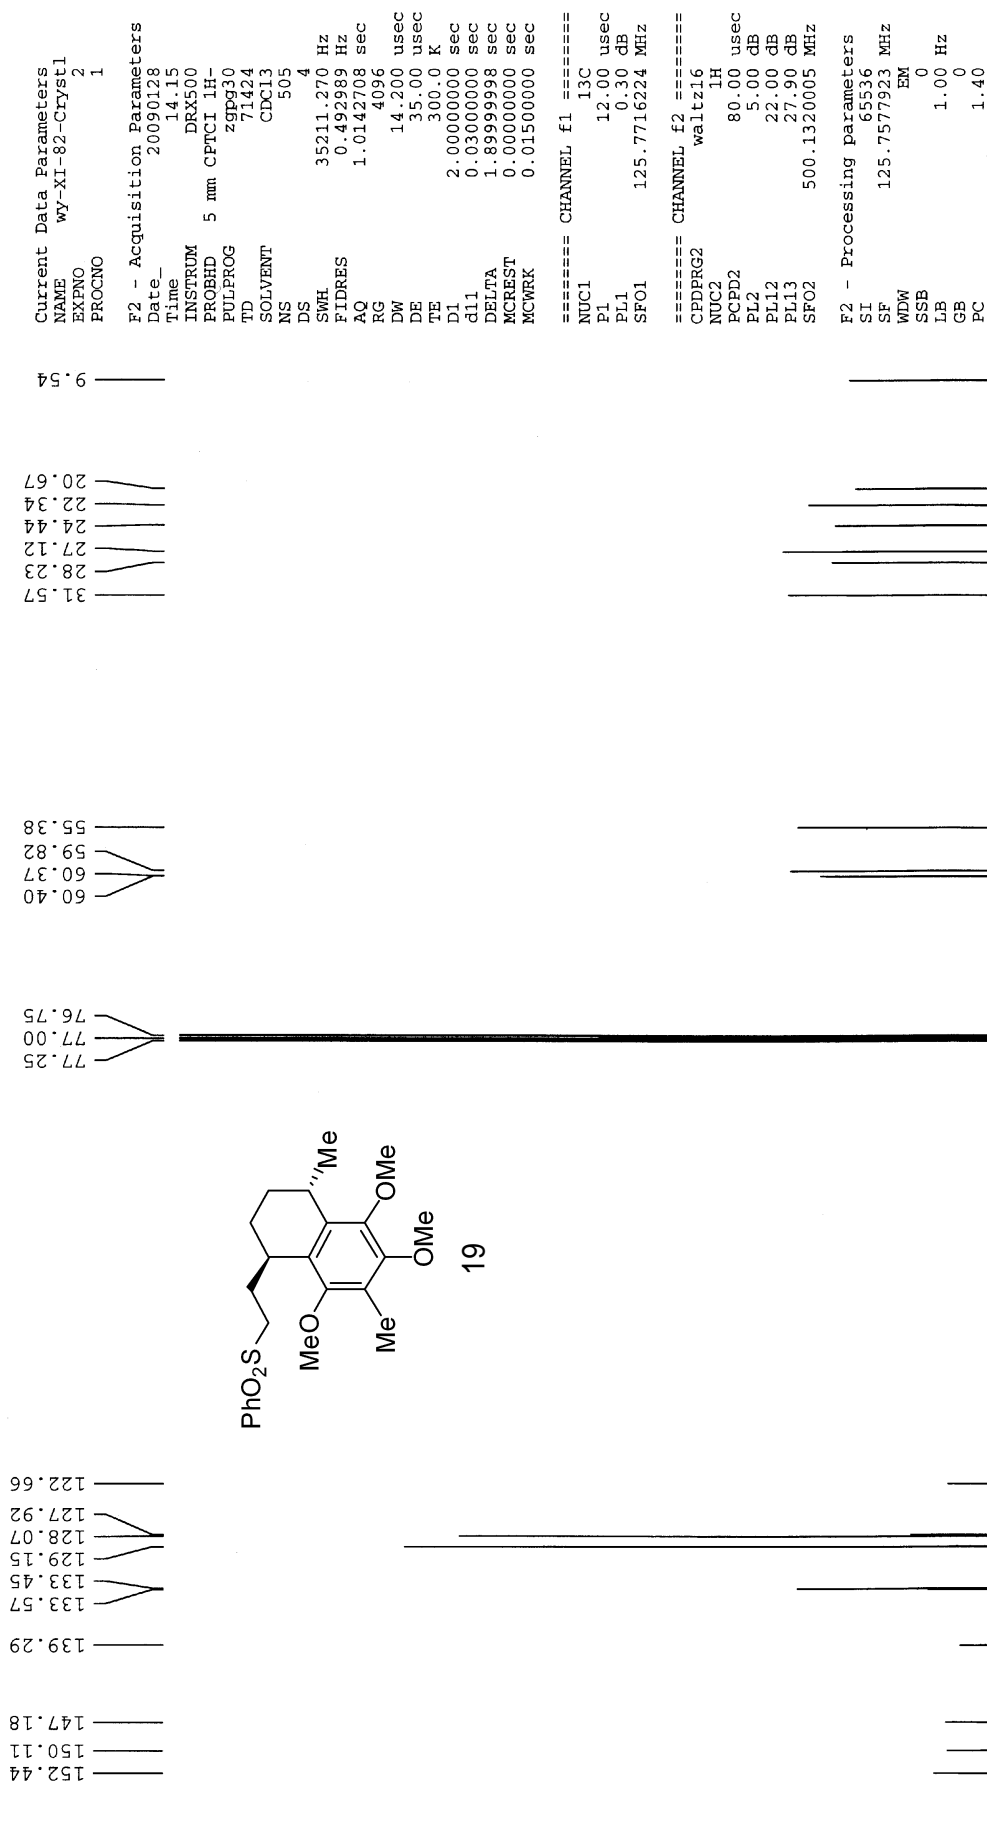

Supplement: NIHMS257222-supplement-01.pdf [file NIHMS257222-supplement-01.pdf]
